# Supplementary material for: Precise Species Identification and Taxonomy Update for the Genus Kluyvera With Reporting Kluyvera sichuanensis sp. nov
Source: Front Microbiol. 2020 Sep 16;11:579306. doi: 10.3389/fmicb.2020.579306 (PMC7524892; doi:10.3389/fmicb.2020.579306)
Supplement: Supplementary file 5 [file Data_Sheet_1.XLSX]

## Sheet: Sheet
BioSample	geographic location	collection date	host	isolation source	SRA	Nucleotide accession no.	Assembly accession no.	Strain	Species labelled	The closest type strain of	ANI, %	isDDH, %	Precise species
SAMEA103980416	Uruguay: Montevideo	1900/1955	N/A	urine	ERR2125838	UGNM00000000	GCA_900452265.1	NCTC 9737	Kluyvera ascorbata	Kluyvera ascorbata	99.7735	99.8	Kluyvera ascorbata
SAMEA104032393	Spain	2013	N/A	Sewage	ERR1950701	N/A	N/A	missing	Kluyvera ascorbata	Kluyvera ascorbata	98.2414	87.2	Kluyvera ascorbata
SAMN00691209	N/A	N/A	N/A	N/A	SRR935003	N/A	N/A	oral taxon 865. F0526	Kluyvera ascorbata	Kluyvera ascorbata	98.2039	87.3	Kluyvera ascorbata
SAMN02743264	USA:North Carolina	N/A	Homo sapiens	human sputum	N/A	JMPL00000000	GCA_000735365.1	ATCC 33433	Kluyvera ascorbata	Kluyvera ascorbata	100	100	Kluyvera ascorbata
SAMN04014985	N/A	N/A	N/A	N/A	SRR3242003	N/A	N/A	FDA-CDC-AR_0144	Kluyvera ascorbata	Kluyvera ascorbata	99.6981	99.6	Kluyvera ascorbata
SAMN10265530	Brazil:Porto Alegre	2016-10-01	Homo sapiens	abdominal collection	N/A	RHFN00000000	GCA_003789135.1	OT2	Kluyvera ascorbata	Kluyvera ascorbata	97.584	81.9	Kluyvera ascorbata
SAMN12774096	United Kingdom: Manchester	2012-11-08	Homo sapiens	clinical sample	SRR10991983	N/A	N/A	NA	Kluyvera ascorbata	Kluyvera ascorbata	99.6936	99.5	Kluyvera ascorbata
SAMD00015933	N/A	N/A	N/A	N/A	DRR015589	N/A	N/A	missing	Kluyvera cryocrescens	Kluyvera cryocrescens	99.16	93.2	Kluyvera cryocrescens
SAMD00046725	N/A	N/A	N/A	N/A	N/A	BCTM00000000	GCA_001571285.1	NBRC 102467	Kluyvera cryocrescens	Kluyvera cryocrescens	100	100	Kluyvera cryocrescens
SAMEA103924398	Japan: Tokyo	1900/1960	N/A	N/A	ERR2125811	UASP00000000	GCA_900452275.1	NCTC 10483	Kluyvera cryocrescens	Kluyvera cryocrescens	99.1199	92.7	Kluyvera cryocrescens
SAMEA104032383	Spain	2012	N/A	Sewage	ERR1950691	N/A	N/A	missing	Kluyvera cryocrescens	Kluyvera cryocrescens	99.7697	99.3	Kluyvera cryocrescens
SAMEA104032394	Spain	2011	N/A	Sewage	ERR1950702	N/A	N/A	missing	Kluyvera cryocrescens	Kluyvera cryocrescens	99.14	93.7	Kluyvera cryocrescens
SAMEA2580319	N/A	1800/2017	N/A	N/A	ERR601557	CAADJD000000000	GCA_900706835.1	NCTC 12993	Kluyvera cryocrescens	Kluyvera cryocrescens	99.7311	90	Kluyvera cryocrescens
SAMEA3470044	N/A	N/A	N/A	N/A	ERR2532114	N/A	N/A	NCTC 10484	Kluyvera cryocrescens	Kluyvera cryocrescens	99.0591	93.8	Kluyvera cryocrescens
SAMN12268149	China:Sichuan	2019-04-01	N/A	hospital sewage	N/A	VKGH00000000	GCA_009765145.1	SCW13	Kluyvera cryocrescens	Kluyvera cryocrescens	99.1655	94.2	Kluyvera cryocrescens
SAMN04482606	China: Chengdu	2015-11-01	N/A	hospital sewage	SRR6878773	LSME00000000	GCA_001682915.1	WCH1410	Kluyvera ascorbata	Kluyvera georgiana	97.9974	82.8	Kluyvera georgiana
SAMD00012204	N/A	N/A	N/A	N/A	DRR015591	N/A	N/A	missing	Kluyvera georgiana	Kluyvera georgiana	99.9698	99.9	Kluyvera georgiana
SAMN04875430	N/A	N/A	Homo sapiens	sputum	N/A	LXEU00000000	GCA_001654985.1	ATCC 51603	Kluyvera georgiana	Kluyvera georgiana	100	100	Kluyvera georgiana
SAMD00004643	N/A	N/A	N/A	N/A	DRR015587	N/A	N/A	missing	Kluyvera intermedia	Kluyvera intermedia	98.725	90.7	Kluyvera intermedia
SAMD00011660	N/A	N/A	N/A	N/A	DRR015712	N/A	N/A	missing	Kluyvera intermedia	Kluyvera intermedia	99.9753	97.6	Kluyvera intermedia
SAMD00046734	N/A	N/A	N/A	N/A	N/A	BCYS00000000	GCA_001598315.1	NBRC 102594	Kluyvera intermedia	Kluyvera intermedia	99.9753	95.3	Kluyvera intermedia
SAMEA2612496	N/A	1800/2017	N/A	N/A	ERR601573	LR134138	GCA_900635475.1	NCTC 12125	Kluyvera intermedia	Kluyvera intermedia	100	100	Kluyvera intermedia
SAMEA3181512	N/A	N/A	N/A	N/A	ERR885451	N/A	N/A	missing	Kluyvera intermedia	Kluyvera intermedia	98.7663	91.2	Kluyvera intermedia
SAMN13135738	China:Guangzhou	2017-04-01	flower	flower shop	N/A	CP045845	GCA_009649915.1	N2-1	Kluyvera intermedia	Kluyvera intermedia	98.8691	91.2	Kluyvera intermedia
SAMN13135960	China:Guangzhou	2017-04-01	N/A	flower	N/A	CP045843	GCA_009650415.1	HR2	Kluyvera intermedia	Kluyvera intermedia	98.8691	91.2	Kluyvera intermedia
SAMN03008042	Malaysia	2013	lettuce	leaves	N/A	LGHZ00000000	GCA_001266615.1	L2	Kluyvera cryocrescens	Kluyvera cryocrescens	89.9258	37.4	Kluyvera Taxon 1
SAMEA5851996	Spain	N/A	Homo sapiens	human gut	N/A	CABMMU000000000	GCA_902387575.1	MGYG-HGUT-02491	Kluyvera ascorbata	Kluyvera georgiana	87.8707	33.3	Kluyvera Taxon 2
SAMN08578632	Spain	2014-04-01	Homo sapiens	Rectal colonization	N/A	PYHO00000000	GCA_003023805.1	KA2	Kluyvera ascorbata	Kluyvera georgiana	87.8707	33.3	Kluyvera Taxon 2
SAMN13951572	India:Manipur	2018-06-24	Oryza sativa	plant	N/A	CP050321	GCA_011765685.1	PO2S7	Kluyvera	Kluyvera georgiana	94.6588	58.2	Kluyvera Taxon 3
SAMEA6368553	Netherlands	N/A	N/A	N/A	ERR3712946	N/A	N/A	missing	Kluyvera georgiana	Kluyvera georgiana	94.5879	58.2	Kluyvera Taxon 3
SAMN07267279	USA: Pittsburgh, PA	2017	Homo sapiens	N/A	N/A	CP022114	GCA_002211745.1	YDC799	Kluyvera georgiana	Kluyvera georgiana	94.5639	58	Kluyvera Taxon 3
SAMEA104428612	N/A	N/A	N/A	N/A	ERR2221354	N/A	N/A	e02842a0-063f-11e6-bb80-3c4a9275d6c8	Kluyvera cryocrescens	Kluyvera intermedia	90.2489	39.2	Kluyvera Taxon 4
SAMEA2393042	N/A	N/A	N/A	N/A	ERR2221162	N/A	N/A	D51-sc-1712206	Kluyvera cryocrescens	Kluyvera intermedia	90.1547	39.1	Kluyvera Taxon 4
SAMEA5852026	USA	N/A	Homo sapiens	human gut	N/A	CABMNU000000000	GCA_902387965.1	MGYG-HGUT-02521	Kluyvera intermedia	Phytobacter ursingii	97.5428	81.8	Phytobacter ursingii
SAMN03733690	USA:Virginia	2009-08-01	Homo sapiens	Perirectal	SRR2965720	N/A	N/A	CAV1140	Kluyvera intermedia	Phytobacter ursingii	97.6507	82	Phytobacter ursingii
SAMN03733693	USA:Virginia	2009-09-01	Homo sapiens	Perirectal	SRR3066288	N/A	N/A	CAV1286	Kluyvera intermedia	Phytobacter ursingii	97.6638	82.1	Phytobacter ursingii
SAMN03733694	USA:Virginia	2009-09-01	Homo sapiens	Perirectal	SRR2965723	N/A	N/A	CAV1149	Kluyvera intermedia	Phytobacter ursingii	97.6801	82.1	Phytobacter ursingii
SAMN03733695	USA:Virginia	2009-09-01	Homo sapiens	Perirectal	SRR2965725	N/A	N/A	CAV1150	Kluyvera intermedia	Phytobacter ursingii	97.6134	82	Phytobacter ursingii
SAMN03733696	USA:Virginia	2009-09-01	Homo sapiens	Perirectal	SRR2965726	N/A	N/A	CAV1297	Kluyvera intermedia	Phytobacter ursingii	97.6188	82.1	Phytobacter ursingii
SAMN03733860	USA:Virginia	2012-08-01	Homo sapiens	Perirectal	SRR2965727	N/A	N/A	CAV1687	Kluyvera intermedia	Phytobacter ursingii	97.6059	82.1	Phytobacter ursingii
SAMN06458494	Denmark	2016-03-24	Homo sapiens	intraabdominal pancreas cyst	N/A	MWPR00000000	GCA_002092975.1	FOSA7093	Kluyvera intermedia	Phytobacter ursingii	97.6356	81.6	Phytobacter ursingii
SAMN07692490	USA:Virginia	2015-03-01	Homo sapiens	Perirectal	SRR6061968	N/A	N/A	CAVp243	Kluyvera intermedia	Phytobacter ursingii	97.6584	82	Phytobacter ursingii
SAMN07692497	USA:Virginia	2015-10-01	Homo sapiens	Perirectal	SRR6061960	N/A	N/A	CAVp300	Kluyvera intermedia	Phytobacter ursingii	97.6372	82.1	Phytobacter ursingii
SAMN07692521	USA:Virginia	2015-04-01	Homo sapiens	Perirectal	SRR6061987	N/A	N/A	CAVp249	Kluyvera intermedia	Phytobacter ursingii	97.6474	82.1	Phytobacter ursingii
SAMN07692533	USA:Virginia	2014-01-01	Homo sapiens	Perirectal	SRR6061991	N/A	N/A	CAVp5	Kluyvera intermedia	Phytobacter ursingii	97.6773	82.2	Phytobacter ursingii
SAMN09210803	USA:Virginia	2014-07-01	N/A	Hosptial waste water	SRR6128592	N/A	N/A	CAV2698	Kluyvera intermedia	Phytobacter ursingii	97.6858	82.1	Phytobacter ursingii
SAMN01828457	N/A	N/A	N/A	N/A	SRR960606	N/A	N/A	UC1 BHI B	Kluyvera sp	Klebsiella aerogenes	98.6727	89.1	Klebsiella aerogenes
