# Supplementary material for: Precise Species Identification and Taxonomy Update for the Genus Kluyvera With Reporting Kluyvera sichuanensis sp. nov
Source: Front Microbiol. 2020 Sep 16;11:579306. doi: 10.3389/fmicb.2020.579306 (PMC7524892; doi:10.3389/fmicb.2020.579306)
Supplement: Supplementary file 6 [file Data_Sheet_2.XLSX]

## Sheet: Sheet1
Contig accession no.	Locus tag of gene	Gene name	Predicted product	number_genomes	average_dose	min_length(bp)	max_length(bp)	average_length(bp)
JABBJF010000004.1	HII27_06720	ispA	(2E%2C6E)-farnesyl diphosphate synthase	170	1	234	930	882.61
JABBJF010000023.1	HII27_19505	ispU	(2E%2C6E)-farnesyl-diphosphate-specific ditrans%2Cpolycis-undecaprenyl-diphosphate synthase	170	1	279	861	736.63
JABBJF010000002.1	HII27_03500	cmk	(d)CMP kinase	170	1	141	726	677.25
JABBJF010000003.1	HII27_05845	hisA	1-(5-phosphoribosyl)-5-[(5-phosphoribosylamino)methylideneamino]imidazole-4-carboxamide isomerase	170	1	150	741	733.89
JABBJF010000013.1	HII27_14685	rsmA	16S rRNA (adenine(1518)-N(6)/adenine(1519)-N(6))-dimethyltransferase RsmA	170	1	249	876	812.84
JABBJF010000013.1	HII27_14540	rsmH	16S rRNA (cytosine(1402)-N(4))-methyltransferase RsmH	170	1	612	945	940.57
JABBJF010000005.1	HII27_07905	rsmJ	16S rRNA (guanine(1516)-N(2))-methyltransferase RsmJ	170	1	156	858	754.79
JABBJF010000009.1	HII27_12490	rsmG	16S rRNA (guanine(527)-N(7))-methyltransferase RsmG	170	1	351	672	624.74
JABBJF010000005.1	HII27_07780	rsmD	16S rRNA (guanine(966)-N(2))-methyltransferase	170	1	294	627	591.85
JABBJF010000011.1	HII27_13310	rsmE	16S rRNA (uracil(1498)-N(3))-methyltransferase	170	1	273	1692	835.18
JABBJF010000003.1	HII27_05075	rsuA	16S rRNA pseudouridine(516) synthase RsuA	170	1	300	789	704.88
JABBJF010000011.1	HII27_13605	plsC	1-acylglycerol-3-phosphate O-acyltransferase	170	1	372	768	737.84
JABBJF010000023.1	HII27_19510	ispC	1-deoxy-D-xylulose-5-phosphate reductoisomerase	170	1	372	1281	1185.75
JABBJF010000023.1	HII27_19545	dapD	2%2C3%2C4%2C5-tetrahydropyridine-2%2C6-dicarboxylate N-succinyltransferase	170	1	165	840	819.95
JABBJF010000002.1	HII27_04340	gpmA	2%2C3-diphosphoglycerate-dependent phosphoglycerate mutase	170	1	129	753	748.33
JABBJF010000002.1	HII27_04100	rlmF	23S rRNA (adenine(1618)-N(6))-methyltransferase RlmF	170	1	171	1164	920.53
JABBJF010000005.1	HII27_07930	rlmJ	23S rRNA (adenine(2030)-N(6))-methyltransferase RlmJ	170	1	273	963	839.25
JABBJF010000008.1	HII27_11275	rlmM	23S rRNA (cytidine(2498)-2'-O)-methyltransferase RlmM	170	1	204	1104	1086.84
JABBJF010000007.1	HII27_10680	rlmG	23S rRNA (guanine(1835)-N(2))-methyltransferase RlmG	170	1	330	1176	1128.39
JABBJF010000025.1	HII27_20655	rlmB	23S rRNA (guanosine(2251)-2'-O)-methyltransferase RlmB	170	1	174	741	728.26
JABBJF010000036.1	HII27_23780	rlmH	23S rRNA (pseudouridine(1915)-N(3))-methyltransferase RlmH	170	1	303	471	459.32
JABBJF010000008.1	HII27_11340	rlmD	23S rRNA (uracil(1939)-C(5))-methyltransferase RlmD	170	1	183	1401	1272.97
JABBJF010000002.1	HII27_03745	rlmC	23S rRNA (uracil(747)-C(5))-methyltransferase RlmC	170	1	225	1146	1097.91
JABBJF010000007.1	HII27_10270	rlmE	23S rRNA (uridine(2552)-2'-O)-methyltransferase RlmE	170	1	561	630	628.75
JABBJF010000002.1	HII27_02540	yceD	23S rRNA accumulation protein YceD	170	1	390	525	520.61
JABBJF010000015.1	HII27_15760	rluD	23S rRNA pseudouridine(1911/1915/1917) synthase RluD	170	1	372	993	965
JABBJF010000042.1	HII27_24995	rluE	23S rRNA pseudouridine(2457) synthase RluE	170	1	270	741	644.37
JABBJF010000023.1	HII27_19680	folK	2-amino-4-hydroxy-6-hydroxymethyldihydropteridine diphosphokinase	170	1	183	606	479.17
JABBJF010000008.1	HII27_11455	ispF	2-C-methyl-D-erythritol 2%2C4-cyclodiphosphate synthase	170	1	255	483	478.54
JABBJF010000020.1	HII27_18160	ridA	2-iminobutanoate/2-iminopropanoate deaminase	170	1	384	405	387.28
JABBJF010000013.1	HII27_14575	leuA	2-isopropylmalate synthase	170	1	381	1596	1562.74
JABBJF010000036.1	HII27_23690	ubiF	2-octaprenyl-3-methyl-6-methoxy-1%2C4-benzoquinol hydroxylase	170	1	288	1191	1162.6
JABBJF010000026.1	HII27_20775	odhB	2-oxoglutarate dehydrogenase complex dihydrolipoyllysine-residue succinyltransferase	170	1	237	1239	1197.82
JABBJF010000011.1	HII27_13730	ribB	3%2C4-dihydroxy-2-butanone-4-phosphate synthase	170	1	651	660	654.05
JABBJF010000011.1	HII27_13690	cpdA	3'%2C5'-cyclic-AMP phosphodiesterase	170	1	195	882	810.54
JABBJF010000020.1	HII27_17890	cysQ	3'(2')%2C5'-bisphosphate nucleotidase CysQ	170	1	465	855	741.81
JABBJF010000018.1	HII27_16935	rpsL	30S ribosomal protein S12	170	1	129	375	373.04
JABBJF010000007.1	HII27_10345	rpsO	30S ribosomal protein S15	170	1	270	270	270
JABBJF010000015.1	HII27_15695	rpsP	30S ribosomal protein S16	170	1	249	249	249
JABBJF010000020.1	HII27_17820	rpsR	30S ribosomal protein S18	170	1	216	228	227.93
JABBJF010000023.1	HII27_19530	rpsB	30S ribosomal protein S2	170	1	726	726	726
JABBJF010000020.1	HII27_17810	rpsF	30S ribosomal protein S6	170	1	186	402	394.22
JABBJF010000018.1	HII27_16930	rpsG	30S ribosomal protein S7	170	1	471	471	471
JABBJF010000007.1	HII27_10335	rbfA	30S ribosome-binding factor RbfA	170	1	186	411	401.21
JABBJF010000018.1	HII27_17130	aroB	3-dehydroquinate synthase	170	1	906	1098	1085.1
JABBJF010000033.1	HII27_23080	kdsA	3-deoxy-8-phosphooctulonate synthase	170	1	315	855	845.53
JABBJF010000005.1	HII27_08455	waaA	3-deoxy-D-manno-octulosonic acid transferase	170	1	255	1401	1263.14
JABBJF010000007.1	HII27_10175	kdsC	3-deoxy-manno-octulosonate-8-phosphatase KdsC	170	1	432	579	565.92
JABBJF010000023.1	HII27_19475	fabZ	3-hydroxyacyl-ACP dehydratase FabZ	170	1	456	456	456
JABBJF010000013.1	HII27_14585	leuC	3-isopropylmalate dehydratase large subunit	170	1	393	1722	1372.47
JABBJF010000013.1	HII27_14590	leuD	3-isopropylmalate dehydratase small subunit	170	1	171	606	598.52
JABBJF010000013.1	HII27_14580	leuB	3-isopropylmalate dehydrogenase	170	1	417	1092	1073.18
JABBJF010000002.1	HII27_02515	fabG	3-oxoacyl-ACP reductase FabG	170	1	243	735	730.77
JABBJF010000002.1	HII27_03510	serC	3-phosphoserine/phosphohydroxythreonine transaminase	170	1	477	1089	1070.12
JABBJF010000002.1	HII27_03505	aroA	3-phosphoshikimate 1-carboxyvinyltransferase	170	1	345	1302	1254.66
JABBJF010000011.1	HII27_13720	ygiD	4%2C5-DOPA dioxygenase extradiol	170	1	354	816	781.01
JABBJF010000033.1	HII27_23045	ispE	4-(cytidine 5'-diphospho)-2-C-methyl-D-erythritol kinase	170	1	675	909	860.49
JABBJF010000010.1	HII27_13215	ispH	4-hydroxy-3-methylbut-2-enyl diphosphate reductase	170	1	435	1401	947.65
JABBJF010000034.1	HII27_23260	ubiD	4-hydroxy-3-polyprenylbenzoate decarboxylase	170	1	267	1539	1443.98
JABBJF010000013.1	HII27_14765	dapB	4-hydroxy-tetrahydrodipicolinate reductase	170	1	180	846	812.18
JABBJF010000017.1	HII27_16675	dapA	4-hydroxy-tetrahydrodipicolinate synthase	170	1	264	891	872.07
JABBJF010000013.1	HII27_14680	pdxA	4-hydroxythreonine-4-phosphate dehydrogenase PdxA	170	1	981	1011	989.33
JABBJF010000003.1	HII27_04460	pdxB	4-phosphoerythronate dehydrogenase PdxB	170	1	222	1260	1114.12
JABBJF010000004.1	HII27_06145	purE	5-(carboxyamino)imidazole ribonucleotide mutase	170	1	183	525	503.98
JABBJF010000004.1	HII27_06150	purK	5-(carboxyamino)imidazole ribonucleotide synthase	170	1	213	1098	1051.64
JABBJF010000008.1	HII27_11465	surE	5'/3'-nucleotidase SurE	170	1	705	849	762.71
JABBJF010000035.1	HII27_23505	prmA	50S ribosomal protein L11 methyltransferase	170	1	198	891	870.92
JABBJF010000007.1	HII27_10090	rplM	50S ribosomal protein L13	170	1	429	504	438.71
JABBJF010000015.1	HII27_15710	rplS	50S ribosomal protein L19	170	1	273	357	347.79
JABBJF010000005.1	HII27_08475	rpmB	50S ribosomal protein L28	170	1	237	237	237
JABBJF010000029.1	HII27_21965	prmB	50S ribosomal protein L3 N(5)-glutamine methyltransferase	170	1	933	1071	959.68
JABBJF010000034.1	HII27_23395	yigB	5-amino-6-(5-phospho-D-ribitylamino)uracil phosphatase YigB	170	1	414	720	715.24
JABBJF010000004.1	HII27_06750	ribE	6%2C7-dimethyl-8-ribityllumazine synthase	170	1	336	471	469.55
JABBJF010000004.1	HII27_06565	queC	7-cyano-7-deazaguanine synthase QueC	170	1	213	813	689.98
JABBJF010000005.1	HII27_07810	yhhQ	7-cyano-7-deazaguanine/7-aminomethyl-7-deazaguanine transporter	170	1	156	714	661.11
JABBJF010000013.1	HII27_14455	mutT	8-oxo-dGTP diphosphatase MutT	170	1	183	423	390.47
JABBJF010000011.1	HII27_13400	mutY	A/G-specific adenine glycosylase	170	1	273	1218	1046.01
JABBJF010000002.1	HII27_03360	uup	ABC transporter ATP-binding protein	170	1	546	1926	1894.98
JABBJF010000018.1	HII27_16990	yheS	ABC transporter ATP-binding protein	170	1	294	1929	1861.47
JABBJF010000023.1	HII27_19715	yadG	ABC transporter ATP-binding protein	170	1	135	948	913.52
JABBJF010000023.1	HII27_19710	yadH	ABC transporter permease	170	1	144	771	760.74
JABBJF010000002.1	HII27_04025	ybiT	ABC-F family ATPase	170	1	258	1728	1552.11
JABBJF010000011.1	HII27_13735	ubiK	accessory factor UbiK family protein	170	1	252	462	296.84
JABBJF010000003.1	HII27_04605	ackA	acetate kinase	170	1	297	1203	1180.06
JABBJF010000031.1	HII27_22560	ilvG	acetolactate synthase 2 catalytic subunit	170	1	552	1695	1629.07
JABBJF010000031.1	HII27_22555	ilvM	acetolactate synthase 2 small subunit	170	1	258	279	263.68
JABBJF010000013.1	HII27_14555	ilvN	acetolactate synthase small subunit	170	1	246	522	489.95
JABBJF010000023.1	HII27_19450	accA	acetyl-CoA carboxylase carboxyl transferase subunit alpha	170	1	252	960	953.89
JABBJF010000003.1	HII27_04480	accD	acetyl-CoA carboxylase%2C carboxyltransferase subunit beta	170	1	126	1092	915.99
JABBJF010000004.1	HII27_06810	acpH	ACP phosphodiesterase	170	1	219	660	576.89
JABBJF010000002.1	HII27_02520	fabD	ACP S-malonyltransferase	170	1	225	1428	916.53
JABBJF010000002.1	HII27_02510	acpP	acyl carrier protein	170	1	234	387	268.22
JABBJF010000023.1	HII27_19470	lpxA	acyl-ACP--UDP-N-acetylglucosamine O-acyltransferase	170	1	693	792	788.45
JABBJF010000004.1	HII27_06305	apt	adenine phosphoribosyltransferase	170	1	141	612	546.74
JABBJF010000018.1	HII27_17120	dam	adenine-specific DNA-methyltransferase	170	1	396	867	817.25
JABBJF010000002.1	HII27_04250	bioA	adenosylmethionine--8-amino-7-oxononanoate transaminase	170	1	267	1335	1261.15
JABBJF010000004.1	HII27_06255	adk	adenylate kinase	170	1	444	837	645.28
JABBJF010000025.1	HII27_20640	purA	adenylosuccinate synthase	170	1	174	1383	1266.86
JABBJF010000018.1	HII27_17170	nudE	ADP compounds hydrolase NudE	170	1	438	675	564.39
JABBJF010000026.1	HII27_20770	sucC	ADP-forming succinate--CoA ligase subunit beta	170	1	204	1272	1164.79
JABBJF010000005.1	HII27_08410	rfaD	ADP-glyceromanno-heptose 6-epimerase	170	1	198	1209	917.81
JABBJF010000005.1	HII27_08415	rfaF	ADP-heptose--LPS heptosyltransferase RfaF	170	1	228	1068	1029.21
JABBJF010000003.1	HII27_04635	alaA	alanine transaminase AlaA	170	1	237	1494	1196.1
JABBJF010000003.1	HII27_04500	purF	amidophosphoribosyltransferase	170	1	369	1518	1491.97
JABBJF010000008.1	HII27_11130	amiC	AMIN domain-containing protein	170	1	177	1359	1218.67
JABBJF010000008.1	HII27_11125	argA	amino-acid N-acetyltransferase	170	1	138	1332	1287.24
JABBJF010000033.1	HII27_23010	pth	aminoacyl-tRNA hydrolase	170	1	582	663	586.39
JABBJF010000002.1	HII27_03390	pepN	aminopeptidase N	170	1	363	2805	2582.88
JABBJF010000004.1	HII27_06525	amtB	ammonium transporter AmtB	170	1	312	1332	1241.95
JABBJF010000001.1	HII27_01290	anmK	anhydro-N-acetylmuramic acid kinase	170	1	216	1155	1110.42
JABBJF010000045.1	HII27_25540	rseA	anti-sigma-E factor RseA	170	1	564	720	653.59
JABBJF010000036.1	HII27_23715	lnt	apolipoprotein N-acyltransferase	170	1	189	1590	1528
JABBJF010000007.1	HII27_10180	kdsD	arabinose-5-phosphate isomerase KdsD	170	1	360	1977	982.19
JABBJF010000002.1	HII27_03720	artP	arginine ABC transporter ATP-binding protein ArtP	170	1	282	888	729.49
JABBJF010000002.1	HII27_03735	artM	arginine ABC transporter permease ArtM	170	1	282	672	664.96
JABBJF010000002.1	HII27_03730	artQ	arginine ABC transporter permease ArtQ	170	1	246	741	711.49
JABBJF010000002.1	HII27_03725	artJ	arginine ABC transporter substrate-binding protein	170	1	279	780	713.47
JABBJF010000037.1	HII27_24080	argO	arginine exporter ArgO	170	1	336	690	624.71
JABBJF010000006.1	HII27_08890	argS	arginine--tRNA ligase	170	1	165	1869	1705.46
JABBJF010000038.1	HII27_24135	yffB	ArsC family reductase	170	1	165	387	355.47
JABBJF010000026.1	HII27_20975	asnB	asparagine synthase B	170	1	129	1671	1640.23
JABBJF010000002.1	HII27_03400	asnS	asparagine--tRNA ligase	170	1	237	1410	1375.47
JABBJF010000002.1	HII27_03410	aspC	aspartate/tyrosine/aromatic aminotransferase	170	1	420	1302	1184.56
JABBJF010000005.1	HII27_07640	asd	aspartate-semialdehyde dehydrogenase	170	1	192	1155	1100.3
JABBJF010000003.1	HII27_04465	usg	aspartate-semialdehyde dehydrogenase	170	1	420	1017	1002.1
JABBJF010000006.1	HII27_08930	aspS	aspartate--tRNA ligase	170	1	435	1989	1715.61
JABBJF010000003.1	HII27_05870	hisG	ATP phosphoribosyltransferase	170	1	207	900	884.24
JABBJF010000009.1	HII27_12520	ravA	ATPase RavA	170	1	258	1704	1462.16
JABBJF010000004.1	HII27_06600	clpP	ATP-dependent Clp endopeptidase proteolytic subunit ClpP	170	1	225	648	618.82
JABBJF010000002.1	HII27_03620	clpS	ATP-dependent Clp protease adapter ClpS	170	1	138	345	316.06
JABBJF010000031.1	HII27_22410	rhlB	ATP-dependent RNA helicase RhlB	170	1	246	1296	1235.57
JABBJF010000002.1	HII27_04135	rhlE	ATP-dependent RNA helicase RhlE	170	1	153	1518	1369.05
JABBJF010000007.1	HII27_10275	ftsH	ATP-dependent zinc metalloprotease FtsH	170	1	327	1959	1906.08
JABBJF010000003.1	HII27_04430	fabB	beta-ketoacyl-ACP synthase I	170	1	135	1221	1194.75
JABBJF010000002.1	HII27_02505	fabF	beta-ketoacyl-ACP synthase II	170	1	174	1242	1197.39
JABBJF010000003.1	HII27_04955	ubiG	bifunctional 2-polyprenyl-6-hydroxyphenol methylase/3-demethylubiquinol 3-O-methyltransferase UbiG	170	1	192	768	724.49
JABBJF010000002.1	HII27_03335	fabA	bifunctional 3-hydroxydecanoyl-ACP dehydratase/trans-2-decenoyl-ACP isomerase	170	1	414	627	522.21
JABBJF010000015.1	HII27_15745	pheA	bifunctional chorismate mutase/prephenate dehydratase	170	1	1152	1242	1162.85
JABBJF010000034.1	HII27_23300	ubiE	bifunctional demethylmenaquinone methyltransferase/2-methoxy-6-polyprenyl-1%2C4-benzoquinol methylase UbiE	170	1	198	771	746.69
JABBJF010000011.1	HII27_13755	hldE	bifunctional D-glycero-beta-D-manno-heptose-7-phosphate kinase/D-glycero-beta-D-manno-heptose 1-phosphate adenylyltransferase HldE	170	1	339	1437	1414.94
JABBJF010000011.1	HII27_13785	folB	bifunctional dihydroneopterin aldolase/7%2C8-dihydroneopterin epimerase	170	1	288	543	368.7
JABBJF010000005.1	HII27_08465	mutM	bifunctional DNA-formamidopyrimidine glycosylase/DNA-(apurinic or apyrimidinic site) lyase	170	1	657	879	809.72
JABBJF010000003.1	HII27_05855	hisB	bifunctional histidinol-phosphatase/imidazoleglycerol-phosphate dehydratase HisB	170	1	144	1068	1054.53
JABBJF010000004.1	HII27_06115	folD	bifunctional methylenetetrahydrofolate dehydrogenase/methenyltetrahydrofolate cyclohydrolase FolD	170	1	213	867	860.42
JABBJF010000003.1	HII27_05115	mepS	bifunctional murein DD-endopeptidase/murein LD-carboxypeptidase	170	1	390	588	558.86
JABBJF010000005.1	HII27_08485	coaBC	bifunctional phosphopantothenoylcysteine decarboxylase/phosphopantothenate--cysteine ligase CoaBC	170	1	393	1614	835.69
JABBJF010000037.1	HII27_23950	dsbC	bifunctional protein-disulfide isomerase/oxidoreductase DsbC	170	1	249	756	695.21
JABBJF010000010.1	HII27_13195	ribF	bifunctional riboflavin kinase/FAD synthetase	170	1	264	1128	930.09
JABBJF010000003.1	HII27_04485	folC	bifunctional tetrahydrofolate synthase/dihydrofolate synthase	170	1	228	1407	1254.07
JABBJF010000003.1	HII27_04425	mnmC	bifunctional tRNA (5-methylaminomethyl-2-thiouridine)(34)-methyltransferase MnmD/FAD-dependent 5-carboxymethylaminomethyl-2-thiouridine(34) oxidoreductase MnmC	170	1	354	2073	1907.03
JABBJF010000017.1	HII27_16460	trmG/rlmN	bifunctional tRNA (adenosine(37)-C2)-methyltransferase TrmG/ribosomal RNA large subunit methyltransferase RlmN	170	1	375	1278	1148.62
JABBJF010000013.1	HII27_14660	rluA	bifunctional tRNA pseudouridine(32) synthase/23S rRNA pseudouridine(746) synthase RluA	170	1	177	717	648.69
JABBJF010000023.1	HII27_19540	glnD	bifunctional uridylyltransferase/uridylyl-removing protein GlnD	170	1	741	2742	2622.94
JABBJF010000002.1	HII27_04245	bioB	biotin synthase BioB	170	1	201	1041	1018.44
JABBJF010000007.1	HII27_10215	ibaG	BolA family iron metabolism protein IbaG	170	1	153	318	262.68
JABBJF010000004.1	HII27_06875	brnQ	branched-chain amino acid transporter carrier protein BrnQ	170	1	654	1476	1313.82
JABBJF010000031.1	HII27_22550	ilvE	branched-chain-amino-acid transaminase	170	1	267	939	917.02
JABBJF010000018.1	HII27_17060	crp	cAMP-activated global transcriptional regulator CRP	170	1	633	633	633
JABBJF010000006.1	HII27_08910	cmoA	carboxy-S-adenosyl-L-methionine synthase CmoA	170	1	729	813	744.62
JABBJF010000013.1	HII27_14550	cra	catabolite repressor/activator	170	1	273	1056	994.71
JABBJF010000027.1	HII27_21255	pgsA	CDP-diacylglycerol--glycerol-3-phosphate 3-phosphatidyltransferase	170	1	549	558	549.3
JABBJF010000045.1	HII27_25480	pssA	CDP-diacylglycerol--serine O-phosphatidyltransferase	170	1	372	1431	1338.33
JABBJF010000005.1	HII27_07770	ftsE	cell division ATP-binding protein FtsE	170	1	186	675	663.21
JABBJF010000026.1	HII27_20710	cpoB	cell division protein CpoB	170	1	204	813	786.7
JABBJF010000013.1	HII27_14535	ftsL	cell division protein FtsL	170	1	318	372	363.81
JABBJF010000011.1	HII27_13600	ftsP	cell division protein FtsP	170	1	210	1440	1386.9
JABBJF010000013.1	HII27_14485	ftsQ	cell division protein FtsQ	170	1	219	870	826.03
JABBJF010000013.1	HII27_14505	ftsW	cell division protein FtsW	170	1	267	1275	1240.47
JABBJF010000005.1	HII27_07765	ftsX	cell division protein FtsX	170	1	144	1164	1039.6
JABBJF010000013.1	HII27_14475	ftsZ	cell division protein FtsZ	170	1	123	1161	1144.53
JABBJF010000002.1	HII27_02495	yceG	cell division protein YceG	170	1	168	1035	997.5
JABBJF010000037.1	HII27_24040	zapA	cell division protein ZapA	170	1	192	465	331.91
JABBJF010000002.1	HII27_03375	zapC	cell division protein ZapC	170	1	174	558	540.21
JABBJF010000013.1	HII27_14445	zapD	cell division protein ZapD	170	1	588	762	743.24
JABBJF010000006.1	HII27_09595	minE	cell division topological specificity factor MinE	170	1	267	279	269.21
JABBJF010000025.1	HII27_20470	groL	chaperonin GroEL	170	1	483	1656	1626.85
JABBJF010000002.1	HII27_03440	mukF	chromosome partition protein MukF	170	1	492	1323	1315.47
JABBJF010000026.1	HII27_20805	gltA	citrate synthase	170	1	168	1302	1256.26
JABBJF010000020.1	HII27_17990	fbp	class 1 fructose-bisphosphatase	170	1	753	1080	998.19
JABBJF010000034.1	HII27_23425	cyaA	class I adenylate cyclase	170	1	459	2736	2492.53
JABBJF010000037.1	HII27_24090	fbaA	class II fructose-bisphosphate aldolase	170	1	336	1086	1072.32
JABBJF010000007.1	HII27_10105	sspB	ClpXP protease specificity-enhancing factor	170	1	405	507	497.86
JABBJF010000036.1	HII27_23710	corC	CNNM family magnesium/cobalt transport protein CorC	170	1	849	975	899.51
JABBJF010000013.1	HII27_14690	apaG	Co2+/Mg2+ efflux protein ApaG	170	1	180	378	376.39
JABBJF010000006.1	HII27_09510	nudL	CoA pyrophosphatase	170	1	249	609	576.33
JABBJF010000013.1	HII27_14665	djlA	co-chaperone DjlA	170	1	228	882	809.91
JABBJF010000025.1	HII27_20465	groS	co-chaperone GroES	170	1	291	297	294
JABBJF010000004.1	HII27_06185	cnoX	co-chaperone YbbN	170	1	255	861	838.68
JABBJF010000006.1	HII27_08945	ruvC	crossover junction endodeoxyribonuclease RuvC	170	1	135	525	512.57
JABBJF010000004.1	HII27_06210	cueR	Cu(I)-responsive transcriptional regulator	170	1	333	471	412.8
JABBJF010000002.1	HII27_04185	moaC	cyclic pyranopterin monophosphate synthase MoaC	170	1	444	519	484.25
JABBJF010000017.1	HII27_16395	iscS	cysteine desulfurase	170	1	417	1302	1213.59
JABBJF010000008.1	HII27_11260	csdA	cysteine desulfurase CsdA	170	1	246	1296	1189.69
JABBJF010000038.1	HII27_24280	cysK	cysteine synthase A	170	1	186	972	955.06
JABBJF010000038.1	HII27_24235	cysM	cysteine synthase CysM	170	1	186	1032	897.83
JABBJF010000004.1	HII27_06225	ybaK	Cys-tRNA(Pro)/Cys-tRNA(Cys) deacylase YbaK	170	1	432	534	480.25
JABBJF010000026.1	HII27_20755	cydB	cytochrome d ubiquinol oxidase subunit II	170	1	126	1140	1126.55
JABBJF010000004.1	HII27_06635	cyoC	cytochrome o ubiquinol oxidase subunit III	170	1	285	624	608.72
JABBJF010000017.1	HII27_16465	rodZ	cytoskeleton protein RodZ	170	1	192	1035	992.58
JABBJF010000003.1	HII27_05645	dcd	dCTP deaminase	170	1	549	606	581.95
JABBJF010000003.1	HII27_04475	dedA	DedA family protein	170	1	219	675	656.19
JABBJF010000005.1	HII27_07595	glpR	DeoR/GlpR family transcriptional regulator	170	1	195	804	743.41
JABBJF010000003.1	HII27_05190	nfo	deoxyribonuclease IV	170	1	516	876	856.06
JABBJF010000010.1	HII27_12940	deoC	deoxyribose-phosphate aldolase	170	1	330	903	771.19
JABBJF010000013.1	HII27_14440	coaE	dephospho-CoA kinase	170	1	195	624	615.47
JABBJF010000001.1	HII27_00115	yeaD	D-hexose-6-phosphate mutarotase	170	1	315	966	879.81
JABBJF010000034.1	HII27_23410	dapF	diaminopimelate epimerase	170	1	351	828	812.77
JABBJF010000013.1	HII27_14355	lpdA	dihydrolipoyl dehydrogenase	170	1	501	1428	1414.61
JABBJF010000005.1	HII27_08390	NA	divergent polysaccharide deacetylase family protein	170	1	222	1059	901.62
JABBJF010000013.1	HII27_14545	mraZ	division/cell wall cluster transcriptional repressor MraZ	170	1	156	540	458.27
JABBJF010000013.1	HII27_14450	yacG	DNA gyrase inhibitor YacG	170	1	192	207	195.88
JABBJF010000034.1	HII27_23390	uvrD	DNA helicase II	170	1	732	2199	2136.78
JABBJF010000002.1	HII27_03295	helD	DNA helicase IV	170	1	282	2139	1989.22
JABBJF010000008.1	HII27_11050	mutH	DNA mismatch repair endonuclease MutH	170	1	144	936	670.11
JABBJF010000009.1	HII27_12340	dnaN	DNA polymerase III subunit beta	170	1	372	1104	1094.21
JABBJF010000020.1	HII27_18215	holC	DNA polymerase III subunit chi	170	1	444	558	456.85
JABBJF010000036.1	HII27_23760	holA	DNA polymerase III subunit delta	170	1	204	1035	1021.86
JABBJF010000011.1	HII27_13805	dnaG	DNA primase	170	1	270	1764	1705.98
JABBJF010000010.1	HII27_12980	radA	DNA repair protein RadA	170	1	297	1392	1352.53
JABBJF010000015.1	HII27_15665	recN	DNA repair protein RecN	170	1	339	1668	1631.48
JABBJF010000045.1	HII27_25575	recO	DNA repair protein RecO	170	1	171	747	714.53
JABBJF010000009.1	HII27_12335	recF	DNA replication/repair protein RecF	170	1	960	1143	1074.88
JABBJF010000002.1	HII27_04080	dps	DNA starvation/stationary phase protection protein Dps	170	1	504	507	504.05
JABBJF010000009.1	HII27_12330	gyrB	DNA topoisomerase (ATP-hydrolyzing) subunit B	170	1	372	2421	2304.2
JABBJF010000011.1	HII27_13680	parE	DNA topoisomerase IV subunit B	170	1	399	1974	1879.92
JABBJF010000023.1	HII27_19660	sfsA	DNA/RNA nuclease SfsA	170	1	240	729	698.58
JABBJF010000005.1	HII27_08145	tag	DNA-3-methyladenine glycosylase I	170	1	396	618	576.16
JABBJF010000017.1	HII27_16640	hda	DnaA inactivator Hda	170	1	525	828	666.79
JABBJF010000037.1	HII27_24070	argP	DNA-binding transcriptional regulator ArgP	170	1	516	906	890.19
JABBJF010000005.1	HII27_08535	rpoZ	DNA-directed RNA polymerase subunit omega	170	1	276	276	276
JABBJF010000032.1	HII27_22835	lpcA	D-sedoheptulose 7-phosphate isomerase	170	1	240	663	579.86
JABBJF010000031.1	HII27_22360	rffA	dTDP-4-amino-4%2C6-dideoxygalactose transaminase	170	1	180	1170	1109.76
JABBJF010000002.1	HII27_02490	tmk	dTMP kinase	170	1	195	654	637.29
JABBJF010000045.1	HII27_25490	NA	DTW domain-containing protein	170	1	666	837	705.88
JABBJF010000007.1	HII27_10075	yhcB	DUF1043 family protein	170	1	393	414	399.53
JABBJF010000020.1	HII27_17900	NA	DUF1107 domain-containing protein	170	1	204	207	206.95
JABBJF010000005.1	HII27_07785	NA	DUF1145 family protein	170	1	264	288	276.76
JABBJF010000011.1	HII27_13695	NA	DUF1249 family protein	170	1	186	432	421.18
JABBJF010000010.1	HII27_12910	NA	DUF1328 domain-containing protein	170	1	162	249	178.96
JABBJF010000011.1	HII27_13385	NA	DUF2884 domain-containing protein	170	1	123	729	710.44
JABBJF010000023.1	HII27_19550	NA	DUF3461 family protein	170	1	147	402	384.54
JABBJF010000003.1	HII27_04610	NA	DUF412 domain-containing protein	170	1	240	495	454.08
JABBJF010000008.1	HII27_11270	NA	DUF423 domain-containing protein	170	1	171	399	393.14
JABBJF010000034.1	HII27_23405	NA	DUF484 domain-containing protein	170	1	165	720	693.73
JABBJF010000048.1	HII27_25875	NA	DUF496 family protein	170	1	306	417	332.17
JABBJF010000001.1	HII27_01330	rsxE	electron transport complex subunit E	170	1	615	714	694.01
JABBJF010000001.1	HII27_01355	rsxA	electron transport complex subunit RsxA	170	1	147	1164	581.67
JABBJF010000001.1	HII27_01340	rsxD	electron transport complex subunit RsxD	170	1	123	1086	1038.38
JABBJF010000001.1	HII27_01335	rsxG	electron transport complex subunit RsxG	170	1	141	642	615.16
JABBJF010000029.1	HII27_21985	epmC	elongation factor P hydroxylase	170	1	219	636	546.42
JABBJF010000025.1	HII27_20540	epmA	elongation factor P--(R)-beta-lysine ligase	170	1	375	981	974.47
JABBJF010000003.1	HII27_05140	yeiP	elongation factor P-like protein YeiP	170	1	150	702	568.93
JABBJF010000023.1	HII27_19525	tsf	elongation factor Ts	170	1	297	924	853.07
JABBJF010000001.1	HII27_01325	nth	endonuclease III	170	1	633	642	636.07
JABBJF010000032.1	HII27_22950	NA	endonuclease/exonuclease/phosphatase family protein	170	1	177	879	783.25
JABBJF010000010.1	HII27_13030	ettA	energy-dependent translational throttle protein EttA	170	1	264	1887	1661.2
JABBJF010000026.1	HII27_20910	ybfF	esterase	170	1	618	873	786.79
JABBJF010000011.1	HII27_13685	yqiA	esterase YqiA	170	1	576	1038	580.64
JABBJF010000002.1	HII27_04220	uvrB	excinuclease ABC subunit B	170	1	153	2031	1971.93
JABBJF010000027.1	HII27_21250	uvrC	excinuclease ABC subunit UvrC	170	1	381	1860	1817.51
JABBJF010000008.1	HII27_11115	recB	exodeoxyribonuclease V subunit beta	170	1	507	3564	3361.72
JABBJF010000017.1	HII27_16540	xseA	exodeoxyribonuclease VII large subunit	170	1	345	1404	1348.63
JABBJF010000004.1	HII27_06890	sbcD	exonuclease subunit SbcD	170	1	144	1269	1179.45
JABBJF010000009.1	HII27_12480	atpB	F0F1 ATP synthase subunit A	170	1	132	822	799.54
JABBJF010000009.1	HII27_12460	atpA	F0F1 ATP synthase subunit alpha	170	1	495	1542	1529.82
JABBJF010000009.1	HII27_12470	atpF	F0F1 ATP synthase subunit B	170	1	471	471	471
JABBJF010000009.1	HII27_12450	atpD	F0F1 ATP synthase subunit beta	170	1	237	1398	1365.02
JABBJF010000009.1	HII27_12465	atpH	F0F1 ATP synthase subunit delta	170	1	444	534	533.47
JABBJF010000009.1	HII27_12445	atpC	F0F1 ATP synthase subunit epsilon	170	1	150	423	417.61
JABBJF010000009.1	HII27_12455	atpG	F0F1 ATP synthase subunit gamma	170	1	171	873	850.15
JABBJF010000037.1	HII27_23970	sdhE	FAD assembly factor SdhE	170	1	264	282	267.07
JABBJF010000037.1	HII27_24020	ubiI	FAD-dependent 2-octaprenylphenol hydroxylase	170	1	285	1269	1178.64
JABBJF010000026.1	HII27_20925	fur	ferric iron uptake transcriptional regulator	170	1	444	522	452.15
JABBJF010000004.1	HII27_06250	hemH	ferrochelatase	170	1	156	1005	952.54
JABBJF010000017.1	HII27_16390	iscR	Fe-S cluster assembly transcriptional regulator IscR	170	1	267	591	490.62
JABBJF010000018.1	HII27_16960	fkpA	FKBP-type peptidyl-prolyl cis-trans isomerase	170	1	192	912	820.01
JABBJF010000008.1	HII27_11280	xni	flap endonuclease Xni	170	1	705	846	761.1
JABBJF010000026.1	HII27_20920	fldA	flavodoxin FldA	170	1	516	633	531.46
JABBJF010000037.1	HII27_23960	fldB	flavodoxin FldB	170	1	381	582	521.75
JABBJF010000017.1	HII27_16470	ispG	flavodoxin-dependent (E)-4-hydroxy-3-methylbut-2-enyl-diphosphate synthase	170	1	228	1125	1112.75
JABBJF010000009.1	HII27_12500	mioC	FMN-binding protein MioC	170	1	156	486	445.25
JABBJF010000025.1	HII27_20625	hflK	FtsH protease activity modulator HflK	170	1	507	1281	1243.41
JABBJF010000002.1	HII27_04335	galM	galactose-1-epimerase	170	1	252	1104	1034.12
JABBJF010000005.1	HII27_07660	gntR	gluconate operon transcriptional repressor GntR	170	1	939	1098	999.21
JABBJF010000026.1	HII27_20950	nagB	glucosamine-6-phosphate deaminase	170	1	639	876	800.49
JABBJF010000006.1	HII27_09000	zwf	glucose-6-phosphate dehydrogenase	170	1	192	1488	1441.34
JABBJF010000032.1	HII27_22750	proB	glutamate 5-kinase	170	1	249	1224	1097.95
JABBJF010000007.1	HII27_10110	gltD	glutamate synthase subunit GltD	170	1	387	1419	1400.83
JABBJF010000023.1	HII27_19620	hemL	glutamate-1-semialdehyde 2%2C1-aminomutase	170	1	168	1290	1253.15
JABBJF010000032.1	HII27_22745	proA	glutamate-5-semialdehyde dehydrogenase	170	1	426	1323	1245.97
JABBJF010000015.1	HII27_15335	gshA	glutamate--cysteine ligase	170	1	195	1698	1516.16
JABBJF010000013.1	HII27_14760	carA	glutamine-hydrolyzing carbamoyl-phosphate synthase small subunit	170	1	189	1185	1141.96
JABBJF010000026.1	HII27_20940	glnS	glutamine--tRNA ligase	170	1	183	1674	1646.84
JABBJF010000033.1	HII27_23055	hemA	glutamyl-tRNA reductase	170	1	408	1416	1251.09
JABBJF010000018.1	HII27_16985	kefG	glutathione-regulated potassium-efflux system ancillary protein KefG	170	1	162	618	546.61
JABBJF010000001.1	HII27_00120	gapA	glyceraldehyde-3-phosphate dehydrogenase	170	1	996	999	996.09
JABBJF010000011.1	HII27_13790	plsY	glycerol-3-phosphate 1-O-acyltransferase PlsY	170	1	168	873	613.25
JABBJF010000005.1	HII27_07610	glpD	glycerol-3-phosphate dehydrogenase	170	1	339	1560	1481.5
JABBJF010000037.1	HII27_24015	gcvT	glycine cleavage system aminomethyltransferase GcvT	170	1	168	1260	1077.43
JABBJF010000037.1	HII27_24010	gcvH	glycine cleavage system protein GcvH	170	1	150	405	388.5
JABBJF010000008.1	HII27_11265	gcvA	glycine cleavage system transcriptional regulator GcvA	170	1	189	999	895.17
JABBJF010000017.1	HII27_16670	gcvR	glycine cleavage system transcriptional repressor	170	1	420	648	571.98
JABBJF010000005.1	HII27_08200	glyQ	glycine--tRNA ligase subunit alpha	170	1	129	1059	892.91
JABBJF010000005.1	HII27_08195	glyS	glycine--tRNA ligase subunit beta	170	1	336	2073	2029.79
JABBJF010000038.1	HII27_24190	ypeA	GNAT family acetyltransferase	170	1	255	534	426.83
JABBJF010000003.1	HII27_05245	folE	GTP cyclohydrolase I FolE	170	1	276	726	663.11
JABBJF010000045.1	HII27_25570	era	GTPase Era	170	1	267	927	894.92
JABBJF010000025.1	HII27_20620	hflX	GTPase HflX	170	1	186	1350	1258.49
JABBJF010000031.1	HII27_22415	gppA	guanosine-5'-triphosphate%2C3'-diphosphate diphosphatase	170	1	237	1572	1447.41
JABBJF010000023.1	HII27_19590	clcA	H(+)/Cl(-) exchange transporter ClcA	170	1	177	1071	994.26
JABBJF010000002.1	HII27_03280	hspQ	heat shock protein HspQ	170	1	255	486	319.25
JABBJF010000037.1	HII27_23980	NA	hemolysin III family protein	170	1	345	741	656.04
JABBJF010000042.1	HII27_24945	hflD	high frequency lysogenization protein HflD	170	1	273	654	631.74
JABBJF010000017.1	HII27_16475	hisS	histidine--tRNA ligase	170	1	177	1353	1255.86
JABBJF010000003.1	HII27_05865	hisD	histidinol dehydrogenase	170	1	429	1428	1278.28
JABBJF010000003.1	HII27_05860	hisC	histidinol-phosphate transaminase	170	1	282	1152	1054.36
JABBJF010000015.1	HII27_15680	NA	HlyC/CorC family transporter	170	1	165	1296	1246.73
JABBJF010000020.1	HII27_17905	NA	HlyC/CorC family transporter	170	1	1266	1425	1339.34
JABBJF010000006.1	HII27_08960	ruvB	Holliday junction branch migration DNA helicase RuvB	170	1	213	1017	984.62
JABBJF010000006.1	HII27_08955	ruvA	Holliday junction branch migration protein RuvA	170	1	150	618	605.35
JABBJF010000011.1	HII27_13325	ruvX	Holliday junction resolvase RuvX	170	1	294	423	416.66
JABBJF010000010.1	HII27_13105	thrB	homoserine kinase	170	1	255	933	908.64
JABBJF010000018.1	HII27_17190	hslO	Hsp33 family molecular chaperone HslO	170	1	225	906	872.88
JABBJF010000031.1	HII27_22455	ilvY	HTH-type transcriptional activator IlvY	170	1	210	1026	884.98
JABBJF010000008.1	HII27_11020	galR	HTH-type transcriptional regulator GalR	170	1	153	1176	999.9
JABBJF010000034.1	HII27_23430	hemC	hydroxymethylbilane synthase	170	1	303	966	940.08
JABBJF010000006.1	HII27_09610	ycgL	hypothetical protein	170	1	189	417	280.66
JABBJF010000023.1	HII27_19725	hpt	hypoxanthine phosphoribosyltransferase	170	1	369	684	543.02
JABBJF010000003.1	HII27_05840	hisF	imidazole glycerol phosphate synthase subunit HisF	170	1	282	858	768.31
JABBJF010000003.1	HII27_05850	hisH	imidazole glycerol phosphate synthase subunit HisH	170	1	570	603	590.95
JABBJF010000017.1	HII27_16545	guaB	IMP dehydrogenase	170	1	231	1578	1444.23
JABBJF010000015.1	HII27_15685	ypjD	inner membrane protein YpjD	170	1	162	933	797.06
JABBJF010000020.1	HII27_17960	ppa	inorganic diphosphatase	170	1	129	687	525.59
JABBJF010000010.1	HII27_13045	yjjX	inosine/xanthosine triphosphatase	170	1	252	549	517.08
JABBJF010000017.1	HII27_16380	suhB	inositol-1-monophosphatase	170	1	135	807	798.18
JABBJF010000002.1	HII27_03490	ihfB	integration host factor subunit beta	170	1	285	318	286.55
JABBJF010000002.1	HII27_03350	pqiB	intermembrane transport protein PqiB	170	1	168	1659	1603.57
JABBJF010000003.1	HII27_05475	apbC	iron-sulfur cluster carrier protein ApbC	170	1	174	1116	1092.02
JABBJF010000023.1	HII27_19585	erpA	iron-sulfur cluster insertion protein ErpA	170	1	345	348	345.32
JABBJF010000005.1	HII27_08125	eptB	kdo(2)-lipid A phosphoethanolamine 7''-transferase	170	1	243	1770	1607.61
JABBJF010000002.1	HII27_02525	fabH	ketoacyl-ACP synthase III	170	1	336	954	944.89
JABBJF010000031.1	HII27_22450	ilvC	ketol-acid reductoisomerase	170	1	633	1542	1467.26
JABBJF010000036.1	HII27_23750	leuS	leucine--tRNA ligase	170	1	261	2670	2508.57
JABBJF010000020.1	HII27_18220	pepA	leucyl aminopeptidase	170	1	1512	1512	1512
JABBJF010000002.1	HII27_03600	aat	leucyl/phenylalanyl-tRNA--protein transferase	170	1	276	768	696.31
JABBJF010000026.1	HII27_20915	ybfE	LexA regulated protein	170	1	282	366	297.81
JABBJF010000007.1	HII27_10195	mlaE	lipid asymmetry maintenance ABC transporter permease subunit MlaE	170	1	246	786	778.12
JABBJF010000023.1	HII27_19465	lpxB	lipid-A-disaccharide synthase	170	1	399	1182	1139.07
JABBJF010000007.1	HII27_10165	lptA	lipopolysaccharide ABC transporter substrate-binding protein LptA	170	1	255	579	552.04
JABBJF010000031.1	HII27_22340	rffM	lipopolysaccharide N-acetylmannosaminouronosyltransferase	170	1	285	765	732.87
JABBJF010000004.1	HII27_06615	NA	lipoprotein	170	1	459	708	582.41
JABBJF010000007.1	HII27_10355	nlpI	lipoprotein NlpI	170	1	279	894	879.25
JABBJF010000002.1	HII27_02425	lolC	lipoprotein-releasing ABC transporter permease subunit LolC	170	1	405	1371	1190.23
JABBJF010000002.1	HII27_02415	lolE	lipoprotein-releasing ABC transporter permease subunit LolE	170	1	1182	1254	1244.68
JABBJF010000036.1	HII27_23820	lipA	lipoyl synthase	170	1	225	966	943.95
JABBJF010000036.1	HII27_23810	lipB	lipoyl(octanoyl) transferase LipB	170	1	180	705	631.75
JABBJF010000006.1	HII27_09585	fadD	long-chain-fatty-acid--CoA ligase FadD	170	1	255	1752	1637.31
JABBJF010000036.1	HII27_23755	lptE	LPS assembly lipoprotein LptE	170	1	264	627	578.08
JABBJF010000007.1	HII27_10160	lptB	LPS export ABC transporter ATP-binding protein	170	1	279	726	717.35
JABBJF010000007.1	HII27_10170	lptC	LPS export ABC transporter periplasmic protein LptC	170	1	537	585	575.74
JABBJF010000020.1	HII27_18225	lptF	LPS export ABC transporter permease LptF	170	1	450	1266	1089.58
JABBJF010000020.1	HII27_18230	lptG	LPS export ABC transporter permease LptG	170	1	261	1086	1065.02
JABBJF010000004.1	HII27_06545	decR	Lrp/AsnC family transcriptional regulator	170	1	456	606	461.51
JABBJF010000018.1	HII27_16965	slyX	lysis protein	170	1	204	234	219.23
JABBJF010000034.1	HII27_23345	pldB	lysophospholipase L2	170	1	204	1068	982.92
JABBJF010000008.1	HII27_11030	lplT	lysophospholipid transporter LplT	170	1	246	1224	1166.24
JABBJF010000002.1	HII27_03415	gloC	MBL fold metallo-hydrolase	170	1	156	684	641.35
JABBJF010000011.1	HII27_13410	mltC	membrane-bound lytic murein transglycosylase MltC	170	1	180	1239	1066.18
JABBJF010000017.1	HII27_16290	mltF	membrane-bound lytic murein transglycosylase MltF	170	1	291	1665	1533.68
JABBJF010000034.1	HII27_23225	hemG	menaquinone-dependent protoporphyrinogen IX dehydrogenase	170	1	504	582	540.25
JABBJF010000002.1	HII27_02480	ycfH	metal-dependent hydrolase	170	1	720	837	794.93
JABBJF010000010.1	HII27_12920	yjjV	metal-dependent hydrolase	170	1	318	807	776.04
JABBJF010000020.1	HII27_18010	pmbA	metalloprotease PmbA	170	1	411	1662	1327.61
JABBJF010000035.1	HII27_23585	tldD	metalloprotease TldD	170	1	168	1467	1421.78
JABBJF010000023.1	HII27_19390	metQ	methionine ABC transporter substrate-binding lipoprotein MetQ	170	1	336	819	810.53
JABBJF010000011.1	HII27_13290	metK	methionine adenosyltransferase	170	1	285	1263	1134.26
JABBJF010000003.1	HII27_05470	metG	methionine--tRNA ligase	170	1	315	2160	2003.55
JABBJF010000002.1	HII27_02775	ycdY	molecular chaperone	170	1	423	600	555.25
JABBJF010000010.1	HII27_13165	dnaK	molecular chaperone DnaK	170	1	210	1926	1881.31
JABBJF010000023.1	HII27_19485	skp	molecular chaperone Skp	170	1	447	597	492.39
JABBJF010000002.1	HII27_04315	modF	molybdate ABC transporter ATP-binding protein ModF	170	1	264	1524	1428.72
JABBJF010000010.1	HII27_13140	mog	molybdopterin adenylyltransferase	170	1	150	594	574.78
JABBJF010000002.1	HII27_03975	moeA	molybdopterin molybdotransferase MoeA	170	1	165	1242	1210.23
JABBJF010000002.1	HII27_04175	moaE	molybdopterin synthase catalytic subunit MoaE	170	1	450	492	453.97
JABBJF010000002.1	HII27_04180	moaD	molybdopterin synthase sulfur carrier subunit	170	1	243	255	246.39
JABBJF010000007.1	HII27_10130	mtgA	monofunctional biosynthetic peptidoglycan transglycosylase	170	1	210	735	721.12
JABBJF010000008.1	HII27_11245	mltA	murein transglycosylase A	170	1	969	1224	1099.18
JABBJF010000004.1	HII27_06620	ampG	muropeptide MFS transporter AmpG	170	1	177	1500	1458
JABBJF010000026.1	HII27_20955	nagA	N-acetylglucosamine-6-phosphate deacetylase	170	1	429	1233	1145.47
JABBJF010000007.1	HII27_10395	eis	N-acetyltransferase	170	1	336	507	501.65
JABBJF010000015.1	HII27_15670	nadK	NAD(+) kinase	170	1	249	915	864.54
JABBJF010000001.1	HII27_00185	ydjA	NAD(P)H nitroreductase	170	1	129	552	535.94
JABBJF010000034.1	HII27_23255	fre	NAD(P)H-flavin reductase	170	1	204	804	697.1
JABBJF010000038.1	HII27_24295	ligA	NAD-dependent DNA ligase LigA	170	1	207	2037	1890.95
JABBJF010000002.1	HII27_02405	cobB	NAD-dependent protein deacylase	170	1	207	888	811.92
JABBJF010000003.1	HII27_04685	nuoJ	NADH-quinone oxidoreductase subunit J	170	1	123	855	427.85
JABBJF010000003.1	HII27_04700	nuoM	NADH-quinone oxidoreductase subunit M	170	1	198	1536	1492.97
JABBJF010000003.1	HII27_04645	nuoA	NADH-quinone oxidoreductase subunit NuoA	170	1	306	489	437.19
JABBJF010000003.1	HII27_04660	nuoE	NADH-quinone oxidoreductase subunit NuoE	170	1	219	552	496.01
JABBJF010000003.1	HII27_04705	nuoN	NADH-quinone oxidoreductase subunit NuoN	170	1	330	1488	1433.27
JABBJF010000008.1	HII27_11770	pncC	nicotinamide-nucleotide amidase	170	1	480	510	498.9
JABBJF010000002.1	HII27_03395	pncB	nicotinate phosphoribosyltransferase	170	1	384	1251	1198.6
JABBJF010000036.1	HII27_23765	nadD	nicotinate-nucleotide adenylyltransferase	170	1	183	705	649.84
JABBJF010000033.1	HII27_23130	psd	nitrate reductase	170	1	192	1143	958.21
JABBJF010000017.1	HII27_16315	glnB	nitrogen regulatory protein P-II	170	1	339	396	339.78
JABBJF010000005.1	HII27_08495	slmA	nucleoid occlusion factor SlmA	170	1	165	600	589.93
JABBJF010000008.1	HII27_11350	mazG	nucleoside triphosphate pyrophosphohydrolase	170	1	246	870	782.9
JABBJF010000017.1	HII27_16455	ndk	nucleoside-diphosphate kinase	170	1	378	513	432.09
JABBJF010000008.1	HII27_11295	ppnN	nucleotide 5'-monophosphate nucleosidase	170	1	381	1368	1349.49
JABBJF010000015.1	HII27_15675	grpE	nucleotide exchange factor GrpE	170	1	195	702	589.72
JABBJF010000004.1	HII27_07275	nudF	NUDIX domain-containing protein	170	1	312	759	629.33
JABBJF010000042.1	HII27_24955	nudJ	NUDIX hydrolase	170	1	435	477	460.46
JABBJF010000003.1	HII27_04595	yfcD	NUDIX hydrolase YfcD	170	1	141	615	548.82
JABBJF010000031.1	HII27_22345	wzyE	O-antigen assembly polymerase	170	1	207	1389	1326.87
JABBJF010000007.1	HII27_10250	cgtA	Obg family GTPase CgtA	170	1	129	1182	1159.67
JABBJF010000007.1	HII27_10230	ispB	octaprenyl diphosphate synthase	170	1	270	1497	939.08
JABBJF010000005.1	HII27_07910	prlC	oligopeptidase A	170	1	219	2055	1969.74
JABBJF010000025.1	HII27_20565	orn	oligoribonuclease	170	1	480	627	547.59
JABBJF010000020.1	HII27_18185	argF	ornithine carbamoyltransferase	170	1	138	1071	992.79
JABBJF010000005.1	HII27_08500	pyrE	orotate phosphoribosyltransferase	170	1	141	693	634.55
JABBJF010000011.1	HII27_13705	tolC	outer membrane channel protein TolC	170	1	297	1533	1453.81
JABBJF010000007.1	HII27_10200	mlaD	outer membrane lipid asymmetry maintenance protein MlaD	170	1	342	603	550.98
JABBJF010000002.1	HII27_03570	lolA	outer membrane lipoprotein chaperone LolA	170	1	207	735	609.86
JABBJF010000003.1	HII27_05290	sanA	outer membrane permeability protein SanA	170	1	207	897	709.73
JABBJF010000023.1	HII27_19490	bamA	outer membrane protein assembly factor BamA	170	1	336	2439	2360.57
JABBJF010000017.1	HII27_16485	bamB	outer membrane protein assembly factor BamB	170	1	204	1200	1166.02
JABBJF010000017.1	HII27_16680	bamC	outer membrane protein assembly factor BamC	170	1	255	1074	1026.91
JABBJF010000015.1	HII27_15660	bamE	outer membrane protein assembly factor BamE	170	1	153	444	339.72
JABBJF010000037.1	HII27_24075	NA	oxidative stress defense protein	170	1	129	861	750.52
JABBJF010000005.1	HII27_08460	coaD	pantetheine-phosphate adenylyltransferase	170	1	456	504	482.77
JABBJF010000033.1	HII27_23060	prfA	peptide chain release factor 1	170	1	885	1182	1083
JABBJF010000037.1	HII27_23940	prfB	peptide chain release factor 2	170	1	495	1050	890.12
JABBJF010000033.1	HII27_23065	prmC	peptide chain release factor N(5)-glutamine methyltransferase	170	1	429	858	838.71
JABBJF010000001.1	HII27_00125	msrB	peptide-methionine (R)-S-oxide reductase MsrB	170	1	279	735	413
JABBJF010000013.1	HII27_14530	ftsI	peptidoglycan glycosyltransferase FtsI	170	1	558	1809	1757
JABBJF010000026.1	HII27_20715	pal	peptidoglycan-associated lipoprotein Pal	170	1	147	537	518.02
JABBJF010000020.1	HII27_17840	fklB	peptidylprolyl isomerase	170	1	240	708	620.56
JABBJF010000004.1	HII27_06135	ppiB	peptidylprolyl isomerase B	170	1	189	606	494.44
JABBJF010000010.1	HII27_13120	yaaA	peroxide stress protein YaaA	170	1	195	870	751.41
JABBJF010000036.1	HII27_23700	ybeZ	PhoH family protein	170	1	336	1206	1042.17
JABBJF010000009.1	HII27_12410	pstB	phosphate ABC transporter ATP-binding protein PstB	170	1	522	819	773.4
JABBJF010000009.1	HII27_12415	pstA	phosphate ABC transporter permease PstA	170	1	342	894	885.49
JABBJF010000009.1	HII27_12420	pstC	phosphate ABC transporter permease PstC	170	1	261	972	953.65
JABBJF010000004.1	HII27_06880	phoR	phosphate regulon sensor histidine kinase PhoR	170	1	288	1338	1267.4
JABBJF010000004.1	HII27_06885	phoB	phosphate response regulator transcription factor PhoB	170	1	192	819	679.75
JABBJF010000009.1	HII27_12405	phoU	phosphate signaling complex protein PhoU	170	1	315	765	721.88
JABBJF010000023.1	HII27_19500	cdsA	phosphatidate cytidylyltransferase	170	1	405	876	834.94
JABBJF010000008.1	HII27_11400	cysH	phosphoadenosine phosphosulfate reductase	170	1	168	753	721.79
JABBJF010000038.1	HII27_24275	ptsH	phosphocarrier protein Hpr	170	1	258	258	258
JABBJF010000018.1	HII27_17200	pckA	phosphoenolpyruvate carboxykinase (ATP)	170	1	252	1632	1564.05
JABBJF010000007.1	HII27_10285	glmM	phosphoglucosamine mutase	170	1	1335	1473	1338.83
JABBJF010000037.1	HII27_24060	serA	phosphoglycerate dehydrogenase	170	1	312	1239	1213.06
JABBJF010000037.1	HII27_24095	pgk	phosphoglycerate kinase	170	1	231	1164	1140.85
JABBJF010000018.1	HII27_17110	gph	phosphoglycolate phosphatase	170	1	390	765	747.18
JABBJF010000029.1	HII27_21955	sixA	phosphohistidine phosphatase SixA	170	1	246	585	465.47
JABBJF010000007.1	HII27_10190	mlaF	phospholipid ABC transporter ATP-binding protein MlaF	170	1	261	822	808.89
JABBJF010000029.1	HII27_21930	mlaA	phospholipid-binding lipoprotein MlaA	170	1	327	780	751.35
JABBJF010000013.1	HII27_14515	mraY	phospho-N-acetylmuramoyl-pentapeptide-transferase	170	1	192	1083	1064.64
JABBJF010000008.1	HII27_11360	eno	phosphopyruvate hydratase	170	1	657	1305	1289.77
JABBJF010000017.1	HII27_16685	purC	phosphoribosylaminoimidazolesuccinocarboxamide synthase	170	1	324	714	709.61
JABBJF010000017.1	HII27_16615	purM	phosphoribosylformylglycinamidine cyclo-ligase	170	1	513	1179	1035.74
JABBJF010000017.1	HII27_16610	purN	phosphoribosylglycinamide formyltransferase	170	1	216	657	637.88
JABBJF010000018.1	HII27_17050	cfxP	phosphoribulokinase	170	1	195	972	854.51
JABBJF010000010.1	HII27_12975	serB	phosphoserine phosphatase	170	1	243	978	965.07
JABBJF010000004.1	HII27_06530	glnK	P-II family nitrogen regulator	170	1	177	417	338.19
JABBJF010000018.1	HII27_17250	bioH	pimeloyl-ACP methyl ester esterase BioH	170	1	177	816	767.95
JABBJF010000005.1	HII27_07665	yhhW	pirin family protein	170	1	696	744	696.28
JABBJF010000023.1	HII27_19675	pcnB	polynucleotide adenylyltransferase PcnB	170	1	528	1464	1340.35
JABBJF010000002.1	HII27_03320	ompA	porin OmpA	170	1	498	1131	1053.55
JABBJF010000013.1	HII27_14420	ppdD	prepilin peptidase-dependent pilin	170	1	162	471	429.43
JABBJF010000007.1	HII27_10290	secG	preprotein translocase subunit SecG	170	1	228	342	332.12
JABBJF010000004.1	HII27_06795	yajC	preprotein translocase subunit YajC	170	1	126	339	330.3
JABBJF010000023.1	HII27_19405	proS	proline--tRNA ligase	170	1	699	1758	1713.35
JABBJF010000008.1	HII27_11065	lgt	prolipoprotein diacylglyceryl transferase	170	1	168	942	855.59
JABBJF010000006.1	HII27_09415	htpX	protease HtpX	170	1	150	963	861.4
JABBJF010000025.1	HII27_20630	hflC	protease modulator HflC	170	1	237	1026	998.91
JABBJF010000010.1	HII27_13060	creA	protein CreA	170	1	222	582	475.75
JABBJF010000004.1	HII27_06790	secD	protein translocase subunit SecD	170	1	756	1848	1803.25
JABBJF010000004.1	HII27_06785	secF	protein translocase subunit SecF	170	1	192	972	957.49
JABBJF010000002.1	HII27_03465	NA	protein YcaR	170	1	165	183	182.84
JABBJF010000005.1	HII27_08365	secB	protein-export chaperone SecB	170	1	378	549	468.04
JABBJF010000008.1	HII27_11470	pcm	protein-L-isoaspartate(D-aspartate) O-methyltransferase	170	1	477	657	626.33
JABBJF010000034.1	HII27_23445	hemY	protoheme IX biogenesis protein HemY	170	1	135	1239	1172.74
JABBJF010000004.1	HII27_06645	cyoE	protoheme IX farnesyltransferase	170	1	339	1233	880.17
JABBJF010000038.1	HII27_24265	crr	PTS glucose transporter subunit IIA	170	1	423	510	508.54
JABBJF010000007.1	HII27_10145	ptsN	PTS IIA-like nitrogen regulatory protein PtsN	170	1	447	528	491.95
JABBJF010000001.1	HII27_00920	hinT	purine nucleoside phosphoramidase	170	1	288	399	358.38
JABBJF010000010.1	HII27_12955	deoD	purine-nucleoside phosphorylase	170	1	180	738	716.82
JABBJF010000001.1	HII27_01300	pdxH	pyridoxamine 5'-phosphate oxidase	170	1	654	717	660.3
JABBJF010000045.1	HII27_25580	pdxJ	pyridoxine 5'-phosphate synthase	170	1	561	732	730.96
JABBJF010000004.1	HII27_06910	ppnP	pyrimidine/purine nucleoside phosphorylase	170	1	129	315	285.02
JABBJF010000013.1	HII27_14370	pdhR	pyruvate dehydrogenase complex transcriptional repressor PdhR	170	1	240	900	761.91
JABBJF010000014.1	HII27_15100	pykF	pyruvate kinase PykF	170	1	534	1497	1389.1
JABBJF010000023.1	HII27_19395	rcsF	Rcs stress response system protein RcsF	170	1	318	420	404.42
JABBJF010000008.1	HII27_11775	recA	recombinase RecA	170	1	885	1071	1060.98
JABBJF010000004.1	HII27_06265	recR	recombination protein RecR	170	1	303	648	600.49
JABBJF010000004.1	HII27_06905	rdgC	recombination-associated protein RdgC	170	1	387	1002	906.95
JABBJF010000002.1	HII27_03565	rarA	replication-associated recombination protein RarA	170	1	207	1350	1305.52
JABBJF010000023.1	HII27_19430	rof	Rho-binding antiterminator	170	1	261	267	261.05
JABBJF010000005.1	HII27_08375	yibN	rhodanese-like domain-containing protein	170	1	360	561	443.47
JABBJF010000006.1	HII27_09590	rnd	ribonuclease D	170	1	150	1245	1106.43
JABBJF010000020.1	HII27_18190	rraB	ribonuclease E inhibitor RraB	170	1	183	477	422.51
JABBJF010000035.1	HII27_23575	rng	ribonuclease G	170	1	174	1470	1418.42
JABBJF010000032.1	HII27_22930	rnhA	ribonuclease HI	170	1	252	1203	471.3
JABBJF010000023.1	HII27_19460	rnhB	ribonuclease HII	170	1	423	633	596.63
JABBJF010000045.1	HII27_25565	rnc	ribonuclease III	170	1	249	939	685.6
JABBJF010000005.1	HII27_08505	rph	ribonuclease PH	170	1	216	717	708.4
JABBJF010000003.1	HII27_04945	nrdB	ribonucleotide-diphosphate reductase subunit beta	170	1	537	1215	1123.81
JABBJF010000037.1	HII27_24065	rpiA	ribose-5-phosphate isomerase RpiA	170	1	162	777	654.44
JABBJF010000033.1	HII27_23040	prs	ribose-phosphate diphosphokinase	170	1	948	1014	948.48
JABBJF010000002.1	HII27_02665	rimJ	ribosomal protein S5-alanine N-acetyltransferase	170	1	225	669	582.32
JABBJF010000007.1	HII27_10265	yhbY	ribosome assembly RNA-binding protein YhbY	170	1	174	348	317.89
JABBJF010000017.1	HII27_16490	der	ribosome biogenesis GTPase Der	170	1	276	1515	1446.05
JABBJF010000015.1	HII27_15700	rimM	ribosome maturation factor RimM	170	1	360	552	544.16
JABBJF010000007.1	HII27_10320	rimP	ribosome maturation factor RimP	170	1	423	585	452.65
JABBJF010000023.1	HII27_19515	frr	ribosome recycling factor	170	1	267	603	555.12
JABBJF010000036.1	HII27_23775	rsfS	ribosome silencing factor	170	1	252	522	349.96
JABBJF010000018.1	HII27_17185	hslR	ribosome-associated heat shock protein Hsp15	170	1	207	414	400.71
JABBJF010000020.1	HII27_18005	NA	ribosome-associated protein	170	1	330	630	549.72
JABBJF010000018.1	HII27_17115	rpe	ribulose-phosphate 3-epimerase	170	1	162	687	665.45
JABBJF010000025.1	HII27_20615	hfq	RNA chaperone Hfq	170	1	291	315	308.4
JABBJF010000006.1	HII27_09405	proQ	RNA chaperone ProQ	170	1	546	735	687.35
JABBJF010000007.1	HII27_10155	rpoN	RNA polymerase factor sigma-54	170	1	372	1440	1410.17
JABBJF010000011.1	HII27_13810	rpoD	RNA polymerase sigma factor RpoD	170	1	291	1983	1812.42
JABBJF010000045.1	HII27_25535	rpoE	RNA polymerase sigma factor RpoE	170	1	213	609	566.12
JABBJF010000023.1	HII27_19665	dksA	RNA polymerase-binding protein DksA	170	1	252	456	454.22
JABBJF010000008.1	HII27_11055	rppH	RNA pyrophosphohydrolase	170	1	294	537	516.79
JABBJF010000018.1	HII27_17225	yhgF	RNA-binding transcriptional accessory protein	170	1	252	2499	2240.25
JABBJF010000007.1	HII27_10140	rapZ	RNase adapter RapZ	170	1	162	873	842.67
JABBJF010000015.1	HII27_15655	pasI	RnfH family protein	170	1	171	309	290.89
JABBJF010000035.1	HII27_23555	mreB	rod shape-determining protein MreB	170	1	174	1044	1030.38
JABBJF010000035.1	HII27_23560	mreC	rod shape-determining protein MreC	170	1	384	1131	1006.65
JABBJF010000035.1	HII27_23565	mreD	rod shape-determining protein MreD	170	1	417	492	488.59
JABBJF010000026.1	HII27_20960	nagC	ROK family transcriptional regulator	170	1	207	1239	1196.67
JABBJF010000038.1	HII27_24200	yfeY	RpoE-regulated lipoprotein	170	1	315	618	575.96
JABBJF010000036.1	HII27_23705	ybeY	rRNA maturation RNase YbeY	170	1	195	477	466.23
JABBJF010000034.1	HII27_23295	ubiJ	SCP2 domain-containing protein	170	1	588	648	606.05
JABBJF010000003.1	HII27_05880	yeeZ	SDR family oxidoreductase	170	1	537	840	822.46
JABBJF010000004.1	HII27_06180	sadH	SDR family oxidoreductase	170	1	288	822	762.47
JABBJF010000034.1	HII27_23275	tatC	Sec-independent protein translocase subunit TatC	170	1	303	801	764.81
JABBJF010000008.1	HII27_11305	syd	SecY-interacting protein	170	1	186	603	539.86
JABBJF010000002.1	HII27_02545	yceF	septum formation inhibitor Maf	170	1	393	666	581.42
JABBJF010000035.1	HII27_23570	yhdE	septum formation inhibitor Maf	170	1	171	594	581.58
JABBJF010000006.1	HII27_09605	minC	septum site-determining protein MinC	170	1	564	807	723.21
JABBJF010000006.1	HII27_09600	minD	septum site-determining protein MinD	170	1	390	816	807.81
JABBJF010000005.1	HII27_08355	cysE	serine O-acetyltransferase	170	1	222	876	807.29
JABBJF010000016.1	HII27_16235	srkA	serine/threonine protein kinase	170	1	249	1029	972.1
JABBJF010000002.1	HII27_03560	serS	serine--tRNA ligase	170	1	186	1293	1267.84
JABBJF010000011.1	HII27_13770	NA	SH3 domain-containing protein	170	1	186	771	636.1
JABBJF010000018.1	HII27_17135	aroK	shikimate kinase AroK	170	1	384	567	521.72
JABBJF010000023.1	HII27_19495	rseP	sigma E protease regulator RseP	170	1	324	1359	1325.24
JABBJF010000045.1	HII27_25545	rseB	sigma-E factor regulatory protein RseB	170	1	381	1002	947.72
JABBJF010000045.1	HII27_25560	lepB	signal peptidase I	170	1	237	990	963.31
JABBJF010000001.1	HII27_00180	sppA	signal peptide peptidase SppA	170	1	432	1905	1801.63
JABBJF010000037.1	HII27_23955	xerD	site-specific tyrosine recombinase XerD	170	1	894	1050	901.87
JABBJF010000025.1	HII27_20560	rsgA	small ribosomal subunit biogenesis GTPase RsgA	170	1	156	1107	1048.31
JABBJF010000045.1	HII27_25550	rseC	SoxR-reducing system protein RseC	170	1	243	507	475.24
JABBJF010000011.1	HII27_13300	sprT	SprT family zinc-dependent metalloprotease	170	1	306	687	482.05
JABBJF010000015.1	HII27_15340	luxS	S-ribosylhomocysteine lyase	170	1	267	516	513.14
JABBJF010000015.1	HII27_15645	smpB	SsrA-binding protein SmpB	170	1	321	528	483.05
JABBJF010000007.1	HII27_10100	sspA	stringent starvation protein A	170	1	261	645	635.18
JABBJF010000026.1	HII27_20765	sucD	succinate--CoA ligase subunit alpha	170	1	177	906	857.63
JABBJF010000034.1	HII27_23340	yigL	sugar/pyridoxal phosphate phosphatase YigL	170	1	237	861	797.81
JABBJF010000009.1	HII27_12320	yidA	sugar-phosphatase	170	1	348	846	804.31
JABBJF010000038.1	HII27_24215	cysP	sulfate ABC transporter substrate-binding protein	170	1	228	1023	1000.66
JABBJF010000008.1	HII27_11430	cysN	sulfate adenylyltransferase subunit CysN	170	1	411	2034	1016.61
JABBJF010000038.1	HII27_24285	cysZ	sulfate transporter CysZ	170	1	294	882	757.26
JABBJF010000038.1	HII27_24230	cysA	sulfate/thiosulfate ABC transporter ATP-binding protein CysA	170	1	195	1122	1068.17
JABBJF010000038.1	HII27_24220	cysT	sulfate/thiosulfate ABC transporter permease CysT	170	1	183	840	822.63
JABBJF010000038.1	HII27_24225	cysW	sulfate/thiosulfate ABC transporter permease CysW	170	1	153	876	860.97
JABBJF010000018.1	HII27_16945	tusC	sulfurtransferase complex subunit TusC	170	1	231	384	358.87
JABBJF010000005.1	HII27_07805	tusA	sulfurtransferase TusA	170	1	150	363	246.78
JABBJF010000002.1	HII27_03265	tusE	sulfurtransferase TusE	170	1	327	426	330.86
JABBJF010000031.1	HII27_22350	wecF	TDP-N-acetylfucosamine:lipid II N-acetylfucosaminyltransferase	170	1	171	1155	1059.66
JABBJF010000002.1	HII27_03475	lpxK	tetraacyldisaccharide 4'-kinase	170	1	135	1071	966.99
JABBJF010000033.1	HII27_23075	NA	tetratricopeptide repeat-containing protein	170	1	165	816	797.23
JABBJF010000004.1	HII27_06740	thiL	thiamine-phosphate kinase	170	1	258	1182	967.79
JABBJF010000016.1	HII27_16230	dsbA	thiol:disulfide interchange protein DsbA	170	1	306	702	621.11
JABBJF010000031.1	HII27_22405	trxA	thioredoxin TrxA	170	1	162	333	328.37
JABBJF010000017.1	HII27_16665	bcp	thioredoxin-dependent thiol peroxidase	170	1	180	474	464.88
JABBJF010000002.1	HII27_03585	trxB	thioredoxin-disulfide reductase	170	1	495	1104	974.82
JABBJF010000005.1	HII27_07605	glpE	thiosulfate sulfurtransferase GlpE	170	1	129	489	328.47
JABBJF010000031.1	HII27_22540	ilvA	threonine ammonia-lyase%2C biosynthetic	170	1	486	1593	1527.33
JABBJF010000008.1	HII27_11070	thyA	thymidylate synthase	170	1	159	795	783.8
JABBJF010000002.1	HII27_03305	yccS	TIGR01666 family membrane protein	170	1	435	2214	2075.93
JABBJF010000026.1	HII27_20720	tolB	Tol-Pal system protein TolB	170	1	213	1299	1272.87
JABBJF010000026.1	HII27_20735	tolQ	Tol-Pal system protein TolQ	170	1	294	702	684.61
JABBJF010000026.1	HII27_20740	ybgC	tol-pal system-associated acyl-CoA thioesterase	170	1	255	405	397.22
JABBJF010000010.1	HII27_13130	tal	transaldolase	170	1	294	1140	942.49
JABBJF010000004.1	HII27_06745	nusB	transcription antitermination factor NusB	170	1	165	426	417.37
JABBJF010000007.1	HII27_10260	greA	transcription elongation factor GreA	170	1	126	477	473.46
JABBJF010000018.1	HII27_17220	greB	transcription elongation factor GreB	170	1	471	639	480.19
JABBJF010000007.1	HII27_10325	nusA	transcription termination/antitermination protein NusA	170	1	474	1509	1482.65
JABBJF010000034.1	HII27_23265	rfaH	transcription/translation regulatory transformer protein RfaH	170	1	189	579	488.14
JABBJF010000018.1	HII27_16955	dauR	transcriptional regulator	170	1	189	1110	715.13
JABBJF010000035.1	HII27_23635	argR	transcriptional regulator ArgR	170	1	282	471	469.89
JABBJF010000009.1	HII27_12505	asnC	transcriptional regulator AsnC	170	1	192	462	455.42
JABBJF010000004.1	HII27_06610	bolA	transcriptional regulator BolA	170	1	144	366	314.54
JABBJF010000004.1	HII27_06760	nrdR	transcriptional regulator NrdR	170	1	132	453	443.12
JABBJF010000001.1	HII27_01275	slyA	transcriptional regulator SlyA	170	1	225	444	433.25
JABBJF010000002.1	HII27_03605	infA	translation initiation factor IF-1	170	1	219	219	219
JABBJF010000007.1	HII27_10330	infB	translation initiation factor IF-2	170	1	291	2715	2617.78
JABBJF010000025.1	HII27_20610	miaA	tRNA (adenosine(37)-N6)-dimethylallyltransferase MiaA	170	1	423	963	927
JABBJF010000025.1	HII27_20595	tsaE	tRNA (adenosine(37)-N6)-threonylcarbamoyltransferase complex ATPase subunit type 1 TsaE	170	1	186	489	459.05
JABBJF010000006.1	HII27_09575	tsaB	tRNA (adenosine(37)-N6)-threonylcarbamoyltransferase complex dimerization subunit type 1 TsaB	170	1	267	714	691.19
JABBJF010000011.1	HII27_13795	tsaD	tRNA (adenosine(37)-N6)-threonylcarbamoyltransferase complex transferase subunit TsaD	170	1	153	1077	981.67
JABBJF010000017.1	HII27_16385	trmJ	tRNA (cytosine(32)/uridine(32)-2'-O)-methyltransferase TrmJ	170	1	402	843	736.12
JABBJF010000015.1	HII27_15705	trmD	tRNA (guanosine(37)-N1)-methyltransferase TrmD	170	1	285	822	759.61
JABBJF010000011.1	HII27_13395	trmB	tRNA (guanosine(46)-N7)-methyltransferase TrmB	170	1	159	810	716.28
JABBJF010000036.1	HII27_23695	miaB	tRNA (N6-isopentenyl adenosine(37)-C2)-methylthiotransferase MiaB	170	1	228	1524	1417.49
JABBJF010000023.1	HII27_19400	tsaA	tRNA (N6-threonylcarbamoyladenosine(37)-N6)-methyltransferase TrmO	170	1	453	750	704.86
JABBJF010000005.1	HII27_08350	trmL	tRNA (uridine(34)/cytosine(34)/5-carboxymethylaminomethyluridine(34)-2'-O)-methyltransferase TrmL	170	1	234	522	469.53
JABBJF010000042.1	HII27_24950	mnmA	tRNA 2-thiouridine(34) synthase MnmA	170	1	243	1170	1095.28
JABBJF010000004.1	HII27_06710	thiI	tRNA 4-thiouridine(8) synthase ThiI	170	1	225	1617	1428.59
JABBJF010000003.1	HII27_05585	rlhA	tRNA 5-hydroxyuridine modification protein YegQ	170	1	198	1515	1324.23
JABBJF010000006.1	HII27_08905	cmoB	tRNA 5-methoxyuridine(34)/uridine 5-oxyacetic acid(34) synthase CmoB	170	1	951	1026	975.28
JABBJF010000017.1	HII27_16285	tadA	tRNA adenosine(34) deaminase TadA	170	1	198	717	507.65
JABBJF010000035.1	HII27_23495	dusB	tRNA dihydrouridine synthase DusB	170	1	222	984	916.6
JABBJF010000003.1	HII27_05345	dusC	tRNA dihydrouridine(16) synthase DusC	170	1	276	1038	913.68
JABBJF010000004.1	HII27_06800	tgt	tRNA guanosine(34) transglycosylase Tgt	170	1	522	1149	1121.28
JABBJF010000004.1	HII27_06805	queA	tRNA preQ1(34) S-adenosylmethionine ribosyltransferase-isomerase QueA	170	1	360	1107	1064.53
JABBJF010000008.1	HII27_11460	truD	tRNA pseudouridine(13) synthase TruD	170	1	150	1062	1030.06
JABBJF010000003.1	HII27_04470	truA	tRNA pseudouridine(38-40) synthase TruA	170	1	219	828	799.27
JABBJF010000007.1	HII27_10340	truB	tRNA pseudouridine(55) synthase TruB	170	1	306	1011	935.65
JABBJF010000008.1	HII27_11315	truC	tRNA pseudouridine(65) synthase TruC	170	1	186	804	764.21
JABBJF010000002.1	HII27_03445	cmoM	tRNA uridine 5-oxyacetic acid(34) methyltransferase CmoM	170	1	300	936	787.47
JABBJF010000009.1	HII27_12370	mnmE	tRNA uridine-5-carboxymethylaminomethyl(34) synthesis GTPase MnmE	170	1	288	1431	1344.16
JABBJF010000045.1	HII27_25500	yfiF	tRNA/rRNA methyltransferase	170	1	258	1131	1063.85
JABBJF010000037.1	HII27_23975	ygfZ	tRNA-modifying protein YgfZ	170	1	387	1056	971.16
JABBJF010000010.1	HII27_13040	trpR	trp operon repressor	170	1	135	402	325.74
JABBJF010000029.1	HII27_21980	yfcA	TSUP family transporter	170	1	174	843	800.11
JABBJF010000010.1	HII27_13080	arcA	two-component system response regulator ArcA	170	1	153	720	708.3
JABBJF010000018.1	HII27_17215	ompR	two-component system response regulator OmpR	170	1	720	873	720.92
JABBJF010000018.1	HII27_17210	envZ	two-component system sensor histidine kinase EnvZ	170	1	192	1416	1308.77
JABBJF010000013.1	HII27_14700	folA	type 3 dihydrofolate reductase	170	1	423	600	481.25
JABBJF010000023.1	HII27_19535	map	type I methionyl aminopeptidase	170	1	789	798	794.51
JABBJF010000034.1	HII27_23400	xerC	tyrosine recombinase XerC	170	1	195	1209	896.25
JABBJF010000001.1	HII27_01305	tyrS	tyrosine--tRNA ligase	170	1	174	1278	1232.86
JABBJF010000004.1	HII27_06140	lpxH	UDP-2%2C3-diacylglucosamine diphosphatase	170	1	219	738	705.16
JABBJF010000023.1	HII27_19480	lpxD	UDP-3-O-(3-hydroxymyristoyl)glucosamine N-acyltransferase	170	1	264	1032	1009.01
JABBJF010000013.1	HII27_14470	lpxC	UDP-3-O-acyl-N-acetylglucosamine deacetylase	170	1	396	921	911.61
JABBJF010000031.1	HII27_22380	wecC	UDP-N-acetyl-D-mannosamine dehydrogenase	170	1	240	1263	1247.46
JABBJF010000007.1	HII27_10220	murA	UDP-N-acetylglucosamine 1-carboxyvinyltransferase	170	1	183	1275	1243.47
JABBJF010000031.1	HII27_22395	wecA	UDP-N-acetylglucosamine--undecaprenyl-phosphate N-acetylglucosaminephosphotransferase	170	1	339	1200	1087.19
JABBJF010000020.1	HII27_17995	mpl	UDP-N-acetylmuramate:L-alanyl-gamma-D-glutamyl-meso-diaminopimelate ligase	170	1	285	1392	1358.25
JABBJF010000013.1	HII27_14495	murC	UDP-N-acetylmuramate--L-alanine ligase	170	1	1374	1560	1475.24
JABBJF010000013.1	HII27_14525	murE	UDP-N-acetylmuramoyl-L-alanyl-D-glutamate--2%2C6-diaminopimelate ligase	170	1	462	1500	1469.58
JABBJF010000013.1	HII27_14520	murF	UDP-N-acetylmuramoyl-tripeptide--D-alanyl-D-alanine ligase	170	1	1356	1377	1359.3
JABBJF010000023.1	HII27_19520	pyrH	UMP kinase	170	1	213	774	724.93
JABBJF010000011.1	HII27_13780	bacA	undecaprenyl-diphosphate phosphatase	170	1	258	1011	813.35
JABBJF010000013.1	HII27_14500	murG	undecaprenyldiphospho-muramoylpentapeptide beta-N-acetylglucosaminyltransferase	170	1	186	1071	1032.82
JABBJF010000017.1	HII27_16630	upp	uracil phosphoribosyltransferase	170	1	183	771	623.42
JABBJF010000045.1	HII27_25505	ung	uracil-DNA glycosylase	170	1	138	777	676.44
JABBJF010000005.1	HII27_08615	xanP	uracil-xanthine permease	170	1	168	1542	1366.4
JABBJF010000002.1	HII27_04200	yvcK	uridine diphosphate-N-acetylglucosamine-binding protein YvcK	170	1	159	936	877.41
JABBJF010000034.1	HII27_23435	hemD	uroporphyrinogen-III synthase	170	1	228	765	735.41
JABBJF010000006.1	HII27_08895	yecM	VOC family protein	170	1	270	663	564.23
JABBJF010000023.1	HII27_19440	cetB	VOC family protein	170	1	165	1749	401.53
JABBJF010000034.1	HII27_23240	pepQ	Xaa-Pro dipeptidase	170	1	1332	1335	1332.02
JABBJF010000032.1	HII27_22770	gpt	xanthine phosphoribosyltransferase	170	1	213	528	455.81
JABBJF010000011.1	HII27_13355	rdgB	XTP/dITP diphosphatase	170	1	168	612	590.56
JABBJF010000023.1	HII27_19745	NA	YacC family pilotin-like protein	170	1	258	543	360.23
JABBJF010000023.1	HII27_19750	NA	YacL family protein	170	1	255	543	366.16
JABBJF010000023.1	HII27_19420	yaeQ	YaeQ family protein	170	1	534	555	545.89
JABBJF010000004.1	HII27_06925	NA	YaiI/YqxD family protein	170	1	441	513	458.89
JABBJF010000004.1	HII27_06695	NA	YajQ family cyclic di-GMP-binding protein	170	1	138	675	495.6
JABBJF010000004.1	HII27_06295	ybaB	YbaB/EbfC family nucleoid-associated protein	170	1	231	435	332.72
JABBJF010000036.1	HII27_23805	NA	YbeD family protein	170	1	264	264	264
JABBJF010000006.1	HII27_09620	NA	YcgN family cysteine cluster protein	170	1	384	555	446.21
JABBJF010000006.1	HII27_08940	yebC	YebC/PmpR family DNA-binding transcriptional regulator	170	1	672	780	741.97
JABBJF010000029.1	HII27_21990	NA	YfcL family protein	170	1	270	294	278.28
JABBJF010000017.1	HII27_16480	NA	YfgM family protein	170	1	246	687	619.02
JABBJF010000045.1	HII27_25590	yfhL	YfhL family 4Fe-4S dicluster ferredoxin	170	1	138	441	258.79
JABBJF010000011.1	HII27_13340	yggS	YggS family pyridoxal phosphate-dependent enzyme	170	1	318	723	700.79
JABBJF010000011.1	HII27_13345	NA	YggT family protein	170	1	222	588	561.18
JABBJF010000035.1	HII27_23515	yhdT	YhdT family protein	170	1	231	339	243.94
JABBJF010000018.1	HII27_17045	NA	YheU family protein	170	1	171	249	219.28
JABBJF010000031.1	HII27_22570	comM	YifB family Mg chelatase-like AAA ATPase	170	1	270	1542	1451.47
JABBJF010000006.1	HII27_09520	NA	YoaH family protein	170	1	180	918	213.49
JABBJF010000038.1	HII27_24125	NA	YpfN family protein	170	1	141	204	197.58
JABBJF010000011.1	HII27_13320	NA	YqgE/AlgH family protein	170	1	462	651	566.72
JABBJF010000006.1	HII27_08970	znuC	zinc ABC transporter ATP-binding protein ZnuC	170	1	330	813	752.51
JABBJF010000006.1	HII27_08965	znuB	zinc ABC transporter permease subunit ZnuB	170	1	222	819	776.86
JABBJF010000006.1	HII27_08975	znuA	zinc ABC transporter substrate-binding protein ZnuA	170	1	438	1023	934.16
