# Supplementary material for: Precise Species Identification and Taxonomy Update for the Genus Kluyvera With Reporting Kluyvera sichuanensis sp. nov
Source: Front Microbiol. 2020 Sep 16;11:579306. doi: 10.3389/fmicb.2020.579306 (PMC7524892; doi:10.3389/fmicb.2020.579306)
Supplement: Supplementary file 8 [file Data_Sheet_4.XLSX]

## Sheet: Sheet4
Species	Strain	Accession no.	START	END	STRAND	GENE	%COVERAGE	%IDENTITY	DATABASE	ACCESSION	PRODUCT
Kluyvera ascorbata	missing	ERR1950701	82737	83752	+	chuS	98.25	73.85	vfdb	NP_756169	(chuS) heme oxygenase ChuS [Chu (VF0227)] [Escherichia coli CFT073]
Kluyvera ascorbata	missing	ERR1950701	18187	19169	+	chuU	98.59	73.86	vfdb	NP_756179	(chuU) heme permease protein ChuU [Chu (VF0227)] [Escherichia coli CFT073]
Kluyvera ascorbata	missing	ERR1950701	15686	17006	+	chuW	98.51	76.13	vfdb	NP_756176	(chuW) Putative oxygen independent coproporphyrinogen III oxidase [Chu (VF0227)] [Escherichia coli CFT073]
Kluyvera ascorbata	missing	ERR1950701	17019	17491	+	chuX	95.56	77.38	vfdb	NP_756177	(chuX) putative heme-binding protein ChuX [Chu (VF0227)] [Escherichia coli CFT073]
Kluyvera ascorbata	missing	ERR1950701	33201	33953	+	csgG	89.81	76.75	vfdb	NP_460110	(csgG) curli production assembly/transport protein CsgG [Agf (VF0103)] [Salmonella enterica subsp. enterica serovar Typhimurium str. LT2]
Kluyvera ascorbata	missing	ERR1950701	54063	54805	+	entA	98.93	78.18	vfdb	NP_752614	(entA) 23-dihydro-23-dihydroxybenzoate dehydrogenase [Enterobactin (VF0228)] [Escherichia coli CFT073]
Kluyvera ascorbata	missing	ERR1950701	53197	54051	+	entB	99.18	79.93	vfdb	NP_752613	(entB) isochorismatase [Enterobactin (VF0228)] [Escherichia coli CFT073]
Kluyvera ascorbata	missing	ERR1950701	50371	51563	+	entC	98.91	73.28	vfdb	NP_752611	(entC) isochorismate synthase 1 [Enterobactin (VF0228)] [Escherichia coli CFT073]
Kluyvera ascorbata	missing	ERR1950701	51584	53165	+	entE	98.14	77.83	vfdb	NP_752612	(entE) 23-dihydroxybenzoate-AMP ligase component of enterobactin synthase multienzyme complex [Enterobactin (VF0228)] [Escherichia coli CFT073]
Kluyvera ascorbata	missing	ERR1950701	41036	44845	+	entF	97.04	72.67	vfdb	NP_752604	(entF) enterobactin synthase multienzyme complex component ATP-dependent [Enterobactin (VF0228)] [Escherichia coli CFT073]
Kluyvera ascorbata	missing	ERR1950701	47882	49095	+	entS	97.04	78.17	vfdb	NP_752609	(entS) enterobactin exporter iron-regulated [enterobactin (IA019)] [Escherichia coli CFT073]
Kluyvera ascorbata	missing	ERR1950701	37122	39395	-	fepA	98.57	76.67	vfdb	NP_752600	(fepA) ferrienterobactin outer membrane transporter [Enterobactin (VF0228)] [Escherichia coli CFT073]
Kluyvera ascorbata	missing	ERR1950701	49230	50097	-	fepB	90.7	79.15	vfdb	NP_752610	(fepB) ferrienterobactin ABC transporter periplasmic binding protein [Enterobactin (VF0228)] [Escherichia coli CFT073]
Kluyvera ascorbata	missing	ERR1950701	44991	45778	-	fepC	96.57	78.3	vfdb	NP_752606	(fepC) ferrienterobactin ABC transporter ATPase [Enterobactin (VF0228)] [Escherichia coli CFT073]
Kluyvera ascorbata	missing	ERR1950701	46764	47747	-	fepD	96.26	77.79	vfdb	NP_752608	(fepD) ferrienterobactin ABC transporter permease [Enterobactin (VF0228)] [Escherichia coli CFT073]
Kluyvera ascorbata	missing	ERR1950701	45775	46686	-	fepG	90.63	76.95	vfdb	NP_752607	(fepG) iron-enterobactin ABC transporter permease [Enterobactin (VF0228)] [Escherichia coli CFT073]
Kluyvera ascorbata	missing	ERR1950701	39675	40782	+	fes	89.44	70.6	vfdb	NP_752602	(fes) enterobactin/ferric enterobactin esterase [enterobactin (IA019)] [Escherichia coli CFT073]
Kluyvera ascorbata	missing	ERR1950701	45571	46166	-	fimC	81.54	75.17	vfdb	NP_757243	(fimC) Chaperone protein fimC precursor [Type 1 fimbriae (VF0221)] [Escherichia coli CFT073]
Kluyvera ascorbata	missing	ERR1950701	42940	45368	-	fimD	92	74.52	vfdb	NP_757244	(fimD) Outer membrane usher protein fimD precursor [Type 1 fimbriae (VF0221)] [Escherichia coli CFT073]
Kluyvera ascorbata	missing	ERR1950701	42335	42804	-	fimF	88.01	71.92	vfdb	NP_757245	(fimF) FimF protein precursor [Type 1 fimbriae (VF0221)] [Escherichia coli CFT073]
Kluyvera ascorbata	missing	ERR1950701	41825	42257	-	fimG	85.91	73.44	vfdb	NP_757247	(fimG) FimG protein precursor [Type 1 fimbriae (VF0221)] [Escherichia coli CFT073]
Kluyvera ascorbata	missing	ERR1950701	40899	41772	-	fimH	95.5	75.4	vfdb	NP_757248	(fimH) FimH protein precursor [Type 1 fimbriae (VF0221)] [Escherichia coli CFT073]
Kluyvera ascorbata	missing	ERR1950701	46280	46798	-	fimI	95.56	69.54	vfdb	NP_757242	(fimI) Fimbrin-like protein fimI precursor [Type 1 fimbriae (VF0221)] [Escherichia coli CFT073]
Kluyvera ascorbata	missing	ERR1950701	21456	22937	+	kpsD	88.19	72.12	vfdb	AAA21682	(kpsD) KpsD [K1 capsule (VF0239)] [Escherichia coli O18:K1:H7 str. RS218]
Kluyvera ascorbata	missing	ERR1950701	29496	30224	-	kpsM	93.18	67.85	vfdb	AAA24046	(kpsM) KpsM [K1 capsule (VF0239)] [Escherichia coli O18:K1:H7 str. RS218]
Kluyvera ascorbata	missing	ERR1950701	28877	29490	-	kpsT	92.58	69.37	vfdb	AAA24047	(kpsT) KpsT [K1 capsule (VF0239)] [Escherichia coli O18:K1:H7 str. RS218]
Kluyvera ascorbata	missing	ERR1950701	396565	397620	-	ompA	100	83.43	vfdb	AAF37887	(ompA) outer membrane protein A [OmpA (VF0236)] [Escherichia coli O18:K1:H7 str. RS218]
Kluyvera ascorbata	missing	ERR1950701	80778	82688	+	shuA	96.17	78.3	vfdb	YP_405019	(shuA) outer membrane heme/hemoglobin receptor ShuA [Shu (VF0256)] [Shigella dysenteriae Sd197]
Kluyvera ascorbata	missing	ERR1950701	19185	19855	+	shuV	87.03	69.6	vfdb	YP_405013	(shuV) ATP-binding component of hemin transport system [Shu (VF0256)] [Shigella dysenteriae Sd197]
Kluyvera ascorbata	missing	ERR1950701	17513	18136	+	shuY	99.68	72.36	vfdb	YP_405015	(shuY) shu locus protein ShuY [Shu (VF0256)] [Shigella dysenteriae Sd197]
Kluyvera ascorbata	ATCC 33433	GCA_000735365.1	58800	59815	+	chuS	98.25	73.95	vfdb	NP_756169	(chuS) heme oxygenase ChuS [Chu (VF0227)] [Escherichia coli CFT073]
Kluyvera ascorbata	ATCC 33433	GCA_000735365.1	20988	21970	-	chuU	98.59	74.06	vfdb	NP_756179	(chuU) heme permease protein ChuU [Chu (VF0227)] [Escherichia coli CFT073]
Kluyvera ascorbata	ATCC 33433	GCA_000735365.1	20302	21010	-	chuV	88.39	69.16	vfdb	NP_756180	(chuV) ATP-binding hydrophilic protein ChuV [Chu (VF0227)] [Escherichia coli CFT073]
Kluyvera ascorbata	ATCC 33433	GCA_000735365.1	23151	24471	-	chuW	98.51	75.53	vfdb	NP_756176	(chuW) Putative oxygen independent coproporphyrinogen III oxidase [Chu (VF0227)] [Escherichia coli CFT073]
Kluyvera ascorbata	ATCC 33433	GCA_000735365.1	22666	23138	-	chuX	95.56	77.38	vfdb	NP_756177	(chuX) putative heme-binding protein ChuX [Chu (VF0227)] [Escherichia coli CFT073]
Kluyvera ascorbata	ATCC 33433	GCA_000735365.1	11400	12152	+	csgG	89.81	77.15	vfdb	NP_460110	(csgG) curli production assembly/transport protein CsgG [Agf (VF0103)] [Salmonella enterica subsp. enterica serovar Typhimurium str. LT2]
Kluyvera ascorbata	ATCC 33433	GCA_000735365.1	10756	11498	-	entA	98.93	78.72	vfdb	NP_752614	(entA) 23-dihydro-23-dihydroxybenzoate dehydrogenase [Enterobactin (VF0228)] [Escherichia coli CFT073]
Kluyvera ascorbata	ATCC 33433	GCA_000735365.1	11510	12364	-	entB	99.18	79.35	vfdb	NP_752613	(entB) isochorismatase [Enterobactin (VF0228)] [Escherichia coli CFT073]
Kluyvera ascorbata	ATCC 33433	GCA_000735365.1	13998	15190	-	entC	98.91	73.19	vfdb	NP_752611	(entC) isochorismate synthase 1 [Enterobactin (VF0228)] [Escherichia coli CFT073]
Kluyvera ascorbata	ATCC 33433	GCA_000735365.1	12396	13977	-	entE	98.08	77.46	vfdb	NP_752612	(entE) 23-dihydroxybenzoate-AMP ligase component of enterobactin synthase multienzyme complex [Enterobactin (VF0228)] [Escherichia coli CFT073]
Kluyvera ascorbata	ATCC 33433	GCA_000735365.1	321	3622	-	entF	84.23	73.36	vfdb	NP_752604	(entF) enterobactin synthase multienzyme complex component ATP-dependent [Enterobactin (VF0228)] [Escherichia coli CFT073]
Kluyvera ascorbata	ATCC 33433	GCA_000735365.1	16466	17679	-	entS	97.04	77.59	vfdb	NP_752609	(entS) enterobactin exporter iron-regulated [enterobactin (IA019)] [Escherichia coli CFT073]
Kluyvera ascorbata	ATCC 33433	GCA_000735365.1	4904	7183	-	fepA	99.64	75.31	vfdb	NP_752600	(fepA) ferrienterobactin outer membrane transporter [Enterobactin (VF0228)] [Escherichia coli CFT073]
Kluyvera ascorbata	ATCC 33433	GCA_000735365.1	15464	16331	+	fepB	90.7	79.03	vfdb	NP_752610	(fepB) ferrienterobactin ABC transporter periplasmic binding protein [Enterobactin (VF0228)] [Escherichia coli CFT073]
Kluyvera ascorbata	ATCC 33433	GCA_000735365.1	17814	18797	+	fepD	96.26	77.89	vfdb	NP_752608	(fepD) ferrienterobactin ABC transporter permease [Enterobactin (VF0228)] [Escherichia coli CFT073]
Kluyvera ascorbata	ATCC 33433	GCA_000735365.1	18875	19786	+	fepG	90.63	76.3	vfdb	NP_752607	(fepG) iron-enterobactin ABC transporter permease [Enterobactin (VF0228)] [Escherichia coli CFT073]
Kluyvera ascorbata	ATCC 33433	GCA_000735365.1	7463	8570	+	fes	89.44	70.07	vfdb	NP_752602	(fes) enterobactin/ferric enterobactin esterase [enterobactin (IA019)] [Escherichia coli CFT073]
Kluyvera ascorbata	ATCC 33433	GCA_000735365.1	58388	58983	-	fimC	81.54	75.17	vfdb	NP_757243	(fimC) Chaperone protein fimC precursor [Type 1 fimbriae (VF0221)] [Escherichia coli CFT073]
Kluyvera ascorbata	ATCC 33433	GCA_000735365.1	55757	58185	-	fimD	92	74.07	vfdb	NP_757244	(fimD) Outer membrane usher protein fimD precursor [Type 1 fimbriae (VF0221)] [Escherichia coli CFT073]
Kluyvera ascorbata	ATCC 33433	GCA_000735365.1	55152	55621	-	fimF	88.01	72.13	vfdb	NP_757245	(fimF) FimF protein precursor [Type 1 fimbriae (VF0221)] [Escherichia coli CFT073]
Kluyvera ascorbata	ATCC 33433	GCA_000735365.1	54642	55074	-	fimG	85.91	73.44	vfdb	NP_757247	(fimG) FimG protein precursor [Type 1 fimbriae (VF0221)] [Escherichia coli CFT073]
Kluyvera ascorbata	ATCC 33433	GCA_000735365.1	53716	54589	-	fimH	95.5	75.74	vfdb	NP_757248	(fimH) FimH protein precursor [Type 1 fimbriae (VF0221)] [Escherichia coli CFT073]
Kluyvera ascorbata	ATCC 33433	GCA_000735365.1	59097	59615	-	fimI	95.56	69.54	vfdb	NP_757242	(fimI) Fimbrin-like protein fimI precursor [Type 1 fimbriae (VF0221)] [Escherichia coli CFT073]
Kluyvera ascorbata	ATCC 33433	GCA_000735365.1	79	2288	-	iutA	96.75	77.51	vfdb	NP_755498	(iutA) ferric aerobactin receptor precusor IutA [Aerobactin (VF0229)] [Escherichia coli CFT073]
Kluyvera ascorbata	ATCC 33433	GCA_000735365.1	10444	11499	+	ompA	100	83.62	vfdb	AAF37887	(ompA) outer membrane protein A [OmpA (VF0236)] [Escherichia coli O18:K1:H7 str. RS218]
Kluyvera ascorbata	ATCC 33433	GCA_000735365.1	56841	58751	+	shuA	96.22	78.34	vfdb	YP_405019	(shuA) outer membrane heme/hemoglobin receptor ShuA [Shu (VF0256)] [Shigella dysenteriae Sd197]
Kluyvera ascorbata	ATCC 33433	GCA_000735365.1	22021	22644	-	shuY	99.68	72.36	vfdb	YP_405015	(shuY) shu locus protein ShuY [Shu (VF0256)] [Shigella dysenteriae Sd197]
Kluyvera ascorbata	OT2	GCA_003789135.1	51089	52508	+	aslA	99.23	81.1	vfdb	AAG10151	(aslA) putative arylsulfatase [AslA (VF0238)] [Escherichia coli O18:K1:H7 str. RS218]
Kluyvera ascorbata	OT2	GCA_003789135.1	10078	10192	-	astA	98.29	91.3	vfdb	BAA94855	(astA) heat-stable enterotoxin 1 [EAST1 (VF0216)] [Escherichia coli O44:H18 042]
Kluyvera ascorbata	OT2	GCA_003789135.1	60421	61436	+	chuS	98.25	74.05	vfdb	NP_756169	(chuS) heme oxygenase ChuS [Chu (VF0227)] [Escherichia coli CFT073]
Kluyvera ascorbata	OT2	GCA_003789135.1	11178	12160	+	chuU	98.59	74.06	vfdb	NP_756179	(chuU) heme permease protein ChuU [Chu (VF0227)] [Escherichia coli CFT073]
Kluyvera ascorbata	OT2	GCA_003789135.1	8677	9997	+	chuW	98.51	76.06	vfdb	NP_756176	(chuW) Putative oxygen independent coproporphyrinogen III oxidase [Chu (VF0227)] [Escherichia coli CFT073]
Kluyvera ascorbata	OT2	GCA_003789135.1	10010	10482	+	chuX	95.56	77.38	vfdb	NP_756177	(chuX) putative heme-binding protein ChuX [Chu (VF0227)] [Escherichia coli CFT073]
Kluyvera ascorbata	OT2	GCA_003789135.1	24307	25014	+	csgG	84.89	76.13	vfdb	NP_460110	(csgG) curli production assembly/transport protein CsgG [Agf (VF0103)] [Salmonella enterica subsp. enterica serovar Typhimurium str. LT2]
Kluyvera ascorbata	OT2	GCA_003789135.1	315003	315745	+	entA	98.93	78.45	vfdb	NP_752614	(entA) 23-dihydro-23-dihydroxybenzoate dehydrogenase [Enterobactin (VF0228)] [Escherichia coli CFT073]
Kluyvera ascorbata	OT2	GCA_003789135.1	314137	314991	+	entB	99.18	79.35	vfdb	NP_752613	(entB) isochorismatase [Enterobactin (VF0228)] [Escherichia coli CFT073]
Kluyvera ascorbata	OT2	GCA_003789135.1	311311	312503	+	entC	98.91	73.44	vfdb	NP_752611	(entC) isochorismate synthase 1 [Enterobactin (VF0228)] [Escherichia coli CFT073]
Kluyvera ascorbata	OT2	GCA_003789135.1	312524	314105	+	entE	98.14	77.76	vfdb	NP_752612	(entE) 23-dihydroxybenzoate-AMP ligase component of enterobactin synthase multienzyme complex [Enterobactin (VF0228)] [Escherichia coli CFT073]
Kluyvera ascorbata	OT2	GCA_003789135.1	301938	305747	+	entF	97.24	72.54	vfdb	NP_752604	(entF) enterobactin synthase multienzyme complex component ATP-dependent [Enterobactin (VF0228)] [Escherichia coli CFT073]
Kluyvera ascorbata	OT2	GCA_003789135.1	308831	310044	+	entS	97.04	77.84	vfdb	NP_752609	(entS) enterobactin exporter iron-regulated [enterobactin (IA019)] [Escherichia coli CFT073]
Kluyvera ascorbata	OT2	GCA_003789135.1	298024	300297	-	fepA	98.66	77.21	vfdb	NP_752600	(fepA) ferrienterobactin outer membrane transporter [Enterobactin (VF0228)] [Escherichia coli CFT073]
Kluyvera ascorbata	OT2	GCA_003789135.1	310170	311037	-	fepB	90.7	78.57	vfdb	NP_752610	(fepB) ferrienterobactin ABC transporter periplasmic binding protein [Enterobactin (VF0228)] [Escherichia coli CFT073]
Kluyvera ascorbata	OT2	GCA_003789135.1	305940	306727	-	fepC	96.57	78.43	vfdb	NP_752606	(fepC) ferrienterobactin ABC transporter ATPase [Enterobactin (VF0228)] [Escherichia coli CFT073]
Kluyvera ascorbata	OT2	GCA_003789135.1	307713	308696	-	fepD	96.26	77.79	vfdb	NP_752608	(fepD) ferrienterobactin ABC transporter permease [Enterobactin (VF0228)] [Escherichia coli CFT073]
Kluyvera ascorbata	OT2	GCA_003789135.1	306724	307635	-	fepG	90.63	76.62	vfdb	NP_752607	(fepG) iron-enterobactin ABC transporter permease [Enterobactin (VF0228)] [Escherichia coli CFT073]
Kluyvera ascorbata	OT2	GCA_003789135.1	300501	301684	+	fes	95.76	70.04	vfdb	NP_752602	(fes) enterobactin/ferric enterobactin esterase [enterobactin (IA019)] [Escherichia coli CFT073]
Kluyvera ascorbata	OT2	GCA_003789135.1	76643	77550	+	gtrB	97.53	71.4	vfdb	NP_706258	(gtrB) bactoprenol glucosyl transferase [LPS (VF0124)] [Shigella flexneri 2a str. 301]
Kluyvera ascorbata	OT2	GCA_003789135.1	55384	57593	-	iutA	96.93	78.05	vfdb	NP_755498	(iutA) ferric aerobactin receptor precusor IutA [Aerobactin (VF0229)] [Escherichia coli CFT073]
Kluyvera ascorbata	OT2	GCA_003789135.1	38516	40106	+	kpsD	94.39	71.41	vfdb	AAA21682	(kpsD) KpsD [K1 capsule (VF0239)] [Escherichia coli O18:K1:H7 str. RS218]
Kluyvera ascorbata	OT2	GCA_003789135.1	50484	51260	-	kpsM	99.74	69.83	vfdb	AAA24046	(kpsM) KpsM [K1 capsule (VF0239)] [Escherichia coli O18:K1:H7 str. RS218]
Kluyvera ascorbata	OT2	GCA_003789135.1	22286	23341	-	ompA	100	83.62	vfdb	AAF37887	(ompA) outer membrane protein A [OmpA (VF0236)] [Escherichia coli O18:K1:H7 str. RS218]
Kluyvera ascorbata	OT2	GCA_003789135.1	58462	60372	+	shuA	96.22	78.39	vfdb	YP_405019	(shuA) outer membrane heme/hemoglobin receptor ShuA [Shu (VF0256)] [Shigella dysenteriae Sd197]
Kluyvera ascorbata	OT2	GCA_003789135.1	12176	12846	+	shuV	87.03	69.75	vfdb	YP_405013	(shuV) ATP-binding component of hemin transport system [Shu (VF0256)] [Shigella dysenteriae Sd197]
Kluyvera ascorbata	OT2	GCA_003789135.1	10504	11127	+	shuY	99.68	72.36	vfdb	YP_405015	(shuY) shu locus protein ShuY [Shu (VF0256)] [Shigella dysenteriae Sd197]
Kluyvera ascorbata	NCTC 9737	GCA_900452265.1	1148188	1149203	-	chuS	98.25	73.95	vfdb	NP_756169	(chuS) heme oxygenase ChuS [Chu (VF0227)] [Escherichia coli CFT073]
Kluyvera ascorbata	NCTC 9737	GCA_900452265.1	1236570	1237552	-	chuU	98.59	74.06	vfdb	NP_756179	(chuU) heme permease protein ChuU [Chu (VF0227)] [Escherichia coli CFT073]
Kluyvera ascorbata	NCTC 9737	GCA_900452265.1	1238733	1240053	-	chuW	98.51	75.53	vfdb	NP_756176	(chuW) Putative oxygen independent coproporphyrinogen III oxidase [Chu (VF0227)] [Escherichia coli CFT073]
Kluyvera ascorbata	NCTC 9737	GCA_900452265.1	1238248	1238720	-	chuX	95.56	77.38	vfdb	NP_756177	(chuX) putative heme-binding protein ChuX [Chu (VF0227)] [Escherichia coli CFT073]
Kluyvera ascorbata	NCTC 9737	GCA_900452265.1	971721	972473	+	csgG	89.81	77.15	vfdb	NP_460110	(csgG) curli production assembly/transport protein CsgG [Agf (VF0103)] [Salmonella enterica subsp. enterica serovar Typhimurium str. LT2]
Kluyvera ascorbata	NCTC 9737	GCA_900452265.1	404795	405537	+	entA	98.93	78.72	vfdb	NP_752614	(entA) 23-dihydro-23-dihydroxybenzoate dehydrogenase [Enterobactin (VF0228)] [Escherichia coli CFT073]
Kluyvera ascorbata	NCTC 9737	GCA_900452265.1	403929	404783	+	entB	99.18	79.35	vfdb	NP_752613	(entB) isochorismatase [Enterobactin (VF0228)] [Escherichia coli CFT073]
Kluyvera ascorbata	NCTC 9737	GCA_900452265.1	401103	402295	+	entC	98.91	73.19	vfdb	NP_752611	(entC) isochorismate synthase 1 [Enterobactin (VF0228)] [Escherichia coli CFT073]
Kluyvera ascorbata	NCTC 9737	GCA_900452265.1	402316	403897	+	entE	98.08	77.46	vfdb	NP_752612	(entE) 23-dihydroxybenzoate-AMP ligase component of enterobactin synthase multienzyme complex [Enterobactin (VF0228)] [Escherichia coli CFT073]
Kluyvera ascorbata	NCTC 9737	GCA_900452265.1	391770	395579	+	entF	97.11	72.65	vfdb	NP_752604	(entF) enterobactin synthase multienzyme complex component ATP-dependent [Enterobactin (VF0228)] [Escherichia coli CFT073]
Kluyvera ascorbata	NCTC 9737	GCA_900452265.1	398614	399827	+	entS	97.04	77.59	vfdb	NP_752609	(entS) enterobactin exporter iron-regulated [enterobactin (IA019)] [Escherichia coli CFT073]
Kluyvera ascorbata	NCTC 9737	GCA_900452265.1	387850	390129	-	fepA	99.64	75.31	vfdb	NP_752600	(fepA) ferrienterobactin outer membrane transporter [Enterobactin (VF0228)] [Escherichia coli CFT073]
Kluyvera ascorbata	NCTC 9737	GCA_900452265.1	399962	400829	-	fepB	90.7	79.03	vfdb	NP_752610	(fepB) ferrienterobactin ABC transporter periplasmic binding protein [Enterobactin (VF0228)] [Escherichia coli CFT073]
Kluyvera ascorbata	NCTC 9737	GCA_900452265.1	395723	396510	-	fepC	96.57	78.17	vfdb	NP_752606	(fepC) ferrienterobactin ABC transporter ATPase [Enterobactin (VF0228)] [Escherichia coli CFT073]
Kluyvera ascorbata	NCTC 9737	GCA_900452265.1	397496	398479	-	fepD	96.26	77.89	vfdb	NP_752608	(fepD) ferrienterobactin ABC transporter permease [Enterobactin (VF0228)] [Escherichia coli CFT073]
Kluyvera ascorbata	NCTC 9737	GCA_900452265.1	396507	397418	-	fepG	90.63	76.3	vfdb	NP_752607	(fepG) iron-enterobactin ABC transporter permease [Enterobactin (VF0228)] [Escherichia coli CFT073]
Kluyvera ascorbata	NCTC 9737	GCA_900452265.1	390409	391516	+	fes	89.44	70.07	vfdb	NP_752602	(fes) enterobactin/ferric enterobactin esterase [enterobactin (IA019)] [Escherichia coli CFT073]
Kluyvera ascorbata	NCTC 9737	GCA_900452265.1	885871	886466	+	fimC	81.54	75.17	vfdb	NP_757243	(fimC) Chaperone protein fimC precursor [Type 1 fimbriae (VF0221)] [Escherichia coli CFT073]
Kluyvera ascorbata	NCTC 9737	GCA_900452265.1	886669	889097	+	fimD	92	74.11	vfdb	NP_757244	(fimD) Outer membrane usher protein fimD precursor [Type 1 fimbriae (VF0221)] [Escherichia coli CFT073]
Kluyvera ascorbata	NCTC 9737	GCA_900452265.1	889233	889702	+	fimF	88.01	72.13	vfdb	NP_757245	(fimF) FimF protein precursor [Type 1 fimbriae (VF0221)] [Escherichia coli CFT073]
Kluyvera ascorbata	NCTC 9737	GCA_900452265.1	889780	890212	+	fimG	85.91	73.44	vfdb	NP_757247	(fimG) FimG protein precursor [Type 1 fimbriae (VF0221)] [Escherichia coli CFT073]
Kluyvera ascorbata	NCTC 9737	GCA_900452265.1	890265	891138	+	fimH	95.5	75.74	vfdb	NP_757248	(fimH) FimH protein precursor [Type 1 fimbriae (VF0221)] [Escherichia coli CFT073]
Kluyvera ascorbata	NCTC 9737	GCA_900452265.1	885239	885757	+	fimI	95.56	69.54	vfdb	NP_757242	(fimI) Fimbrin-like protein fimI precursor [Type 1 fimbriae (VF0221)] [Escherichia coli CFT073]
Kluyvera ascorbata	NCTC 9737	GCA_900452265.1	106739	108948	-	iutA	96.75	77.51	vfdb	NP_755498	(iutA) ferric aerobactin receptor precusor IutA [Aerobactin (VF0229)] [Escherichia coli CFT073]
Kluyvera ascorbata	NCTC 9737	GCA_900452265.1	755292	756347	-	ompA	100	83.62	vfdb	AAF37887	(ompA) outer membrane protein A [OmpA (VF0236)] [Escherichia coli O18:K1:H7 str. RS218]
Kluyvera ascorbata	NCTC 9737	GCA_900452265.1	1149252	1151162	-	shuA	96.22	78.34	vfdb	YP_405019	(shuA) outer membrane heme/hemoglobin receptor ShuA [Shu (VF0256)] [Shigella dysenteriae Sd197]
Kluyvera ascorbata	NCTC 9737	GCA_900452265.1	1235884	1236554	-	shuV	87.03	69.45	vfdb	YP_405013	(shuV) ATP-binding component of hemin transport system [Shu (VF0256)] [Shigella dysenteriae Sd197]
Kluyvera ascorbata	NCTC 9737	GCA_900452265.1	1237603	1238226	-	shuY	99.68	72.36	vfdb	YP_405015	(shuY) shu locus protein ShuY [Shu (VF0256)] [Shigella dysenteriae Sd197]
Kluyvera ascorbata	NA	SRR10991983	17349	17463	-	astA	98.29	91.3	vfdb	BAA94855	(astA) heat-stable enterotoxin 1 [EAST1 (VF0216)] [Escherichia coli O44:H18 042]
Kluyvera ascorbata	NA	SRR10991983	160660	161675	-	chuS	98.25	73.95	vfdb	NP_756169	(chuS) heme oxygenase ChuS [Chu (VF0227)] [Escherichia coli CFT073]
Kluyvera ascorbata	NA	SRR10991983	249042	250024	-	chuU	98.59	74.06	vfdb	NP_756179	(chuU) heme permease protein ChuU [Chu (VF0227)] [Escherichia coli CFT073]
Kluyvera ascorbata	NA	SRR10991983	251205	252525	-	chuW	98.51	75.53	vfdb	NP_756176	(chuW) Putative oxygen independent coproporphyrinogen III oxidase [Chu (VF0227)] [Escherichia coli CFT073]
Kluyvera ascorbata	NA	SRR10991983	250720	251192	-	chuX	95.56	77.38	vfdb	NP_756177	(chuX) putative heme-binding protein ChuX [Chu (VF0227)] [Escherichia coli CFT073]
Kluyvera ascorbata	NA	SRR10991983	4514	5266	-	csgG	89.81	77.15	vfdb	NP_460110	(csgG) curli production assembly/transport protein CsgG [Agf (VF0103)] [Salmonella enterica subsp. enterica serovar Typhimurium str. LT2]
Kluyvera ascorbata	NA	SRR10991983	340287	341029	+	entA	98.93	78.72	vfdb	NP_752614	(entA) 23-dihydro-23-dihydroxybenzoate dehydrogenase [Enterobactin (VF0228)] [Escherichia coli CFT073]
Kluyvera ascorbata	NA	SRR10991983	339421	340275	+	entB	99.18	79.35	vfdb	NP_752613	(entB) isochorismatase [Enterobactin (VF0228)] [Escherichia coli CFT073]
Kluyvera ascorbata	NA	SRR10991983	336595	337787	+	entC	98.91	73.19	vfdb	NP_752611	(entC) isochorismate synthase 1 [Enterobactin (VF0228)] [Escherichia coli CFT073]
Kluyvera ascorbata	NA	SRR10991983	337808	339389	+	entE	98.08	77.46	vfdb	NP_752612	(entE) 23-dihydroxybenzoate-AMP ligase component of enterobactin synthase multienzyme complex [Enterobactin (VF0228)] [Escherichia coli CFT073]
Kluyvera ascorbata	NA	SRR10991983	327262	331071	+	entF	97.11	72.65	vfdb	NP_752604	(entF) enterobactin synthase multienzyme complex component ATP-dependent [Enterobactin (VF0228)] [Escherichia coli CFT073]
Kluyvera ascorbata	NA	SRR10991983	334106	335319	+	entS	97.04	77.51	vfdb	NP_752609	(entS) enterobactin exporter iron-regulated [enterobactin (IA019)] [Escherichia coli CFT073]
Kluyvera ascorbata	NA	SRR10991983	323342	325621	-	fepA	99.64	75.31	vfdb	NP_752600	(fepA) ferrienterobactin outer membrane transporter [Enterobactin (VF0228)] [Escherichia coli CFT073]
Kluyvera ascorbata	NA	SRR10991983	335454	336321	-	fepB	90.7	79.03	vfdb	NP_752610	(fepB) ferrienterobactin ABC transporter periplasmic binding protein [Enterobactin (VF0228)] [Escherichia coli CFT073]
Kluyvera ascorbata	NA	SRR10991983	331215	332002	-	fepC	96.57	78.17	vfdb	NP_752606	(fepC) ferrienterobactin ABC transporter ATPase [Enterobactin (VF0228)] [Escherichia coli CFT073]
Kluyvera ascorbata	NA	SRR10991983	332988	333971	-	fepD	96.26	77.89	vfdb	NP_752608	(fepD) ferrienterobactin ABC transporter permease [Enterobactin (VF0228)] [Escherichia coli CFT073]
Kluyvera ascorbata	NA	SRR10991983	331999	332910	-	fepG	90.63	76.3	vfdb	NP_752607	(fepG) iron-enterobactin ABC transporter permease [Enterobactin (VF0228)] [Escherichia coli CFT073]
Kluyvera ascorbata	NA	SRR10991983	325901	327008	+	fes	89.44	70.07	vfdb	NP_752602	(fes) enterobactin/ferric enterobactin esterase [enterobactin (IA019)] [Escherichia coli CFT073]
Kluyvera ascorbata	NA	SRR10991983	256699	257294	+	fimC	81.54	75	vfdb	NP_757243	(fimC) Chaperone protein fimC precursor [Type 1 fimbriae (VF0221)] [Escherichia coli CFT073]
Kluyvera ascorbata	NA	SRR10991983	257497	259925	+	fimD	92	74.07	vfdb	NP_757244	(fimD) Outer membrane usher protein fimD precursor [Type 1 fimbriae (VF0221)] [Escherichia coli CFT073]
Kluyvera ascorbata	NA	SRR10991983	260061	260530	+	fimF	88.01	72.13	vfdb	NP_757245	(fimF) FimF protein precursor [Type 1 fimbriae (VF0221)] [Escherichia coli CFT073]
Kluyvera ascorbata	NA	SRR10991983	260608	261040	+	fimG	85.91	73.44	vfdb	NP_757247	(fimG) FimG protein precursor [Type 1 fimbriae (VF0221)] [Escherichia coli CFT073]
Kluyvera ascorbata	NA	SRR10991983	261093	261966	+	fimH	95.5	75.74	vfdb	NP_757248	(fimH) FimH protein precursor [Type 1 fimbriae (VF0221)] [Escherichia coli CFT073]
Kluyvera ascorbata	NA	SRR10991983	256067	256585	+	fimI	95.56	69.54	vfdb	NP_757242	(fimI) Fimbrin-like protein fimI precursor [Type 1 fimbriae (VF0221)] [Escherichia coli CFT073]
Kluyvera ascorbata	NA	SRR10991983	42232	44441	-	iutA	96.75	77.51	vfdb	NP_755498	(iutA) ferric aerobactin receptor precusor IutA [Aerobactin (VF0229)] [Escherichia coli CFT073]
Kluyvera ascorbata	NA	SRR10991983	681774	682829	-	ompA	100	83.62	vfdb	AAF37887	(ompA) outer membrane protein A [OmpA (VF0236)] [Escherichia coli O18:K1:H7 str. RS218]
Kluyvera ascorbata	NA	SRR10991983	161724	163634	-	shuA	96.22	78.34	vfdb	YP_405019	(shuA) outer membrane heme/hemoglobin receptor ShuA [Shu (VF0256)] [Shigella dysenteriae Sd197]
Kluyvera ascorbata	NA	SRR10991983	248356	249026	-	shuV	87.03	69.45	vfdb	YP_405013	(shuV) ATP-binding component of hemin transport system [Shu (VF0256)] [Shigella dysenteriae Sd197]
Kluyvera ascorbata	NA	SRR10991983	250075	250698	-	shuY	99.68	72.36	vfdb	YP_405015	(shuY) shu locus protein ShuY [Shu (VF0256)] [Shigella dysenteriae Sd197]
Kluyvera ascorbata	FDA-CDC-AR_0144	SRR3242003	177162	178177	+	chuS	98.25	73.95	vfdb	NP_756169	(chuS) heme oxygenase ChuS [Chu (VF0227)] [Escherichia coli CFT073]
Kluyvera ascorbata	FDA-CDC-AR_0144	SRR3242003	53151	54133	+	chuU	98.59	74.06	vfdb	NP_756179	(chuU) heme permease protein ChuU [Chu (VF0227)] [Escherichia coli CFT073]
Kluyvera ascorbata	FDA-CDC-AR_0144	SRR3242003	50650	51970	+	chuW	98.51	75.53	vfdb	NP_756176	(chuW) Putative oxygen independent coproporphyrinogen III oxidase [Chu (VF0227)] [Escherichia coli CFT073]
Kluyvera ascorbata	FDA-CDC-AR_0144	SRR3242003	51983	52455	+	chuX	95.56	77.38	vfdb	NP_756177	(chuX) putative heme-binding protein ChuX [Chu (VF0227)] [Escherichia coli CFT073]
Kluyvera ascorbata	FDA-CDC-AR_0144	SRR3242003	27011	27763	-	csgG	89.81	77.15	vfdb	NP_460110	(csgG) curli production assembly/transport protein CsgG [Agf (VF0103)] [Salmonella enterica subsp. enterica serovar Typhimurium str. LT2]
Kluyvera ascorbata	FDA-CDC-AR_0144	SRR3242003	439449	440191	-	entA	98.93	78.72	vfdb	NP_752614	(entA) 23-dihydro-23-dihydroxybenzoate dehydrogenase [Enterobactin (VF0228)] [Escherichia coli CFT073]
Kluyvera ascorbata	FDA-CDC-AR_0144	SRR3242003	440203	441057	-	entB	99.18	79.35	vfdb	NP_752613	(entB) isochorismatase [Enterobactin (VF0228)] [Escherichia coli CFT073]
Kluyvera ascorbata	FDA-CDC-AR_0144	SRR3242003	442691	443883	-	entC	98.4	73.08	vfdb	NP_752611	(entC) isochorismate synthase 1 [Enterobactin (VF0228)] [Escherichia coli CFT073]
Kluyvera ascorbata	FDA-CDC-AR_0144	SRR3242003	441089	442670	-	entE	98.08	77.46	vfdb	NP_752612	(entE) 23-dihydroxybenzoate-AMP ligase component of enterobactin synthase multienzyme complex [Enterobactin (VF0228)] [Escherichia coli CFT073]
Kluyvera ascorbata	FDA-CDC-AR_0144	SRR3242003	449407	453216	-	entF	97.11	72.65	vfdb	NP_752604	(entF) enterobactin synthase multienzyme complex component ATP-dependent [Enterobactin (VF0228)] [Escherichia coli CFT073]
Kluyvera ascorbata	FDA-CDC-AR_0144	SRR3242003	445159	446372	-	entS	97.04	77.59	vfdb	NP_752609	(entS) enterobactin exporter iron-regulated [enterobactin (IA019)] [Escherichia coli CFT073]
Kluyvera ascorbata	FDA-CDC-AR_0144	SRR3242003	454857	457136	+	fepA	99.64	75.31	vfdb	NP_752600	(fepA) ferrienterobactin outer membrane transporter [Enterobactin (VF0228)] [Escherichia coli CFT073]
Kluyvera ascorbata	FDA-CDC-AR_0144	SRR3242003	444157	445024	+	fepB	90.7	79.03	vfdb	NP_752610	(fepB) ferrienterobactin ABC transporter periplasmic binding protein [Enterobactin (VF0228)] [Escherichia coli CFT073]
Kluyvera ascorbata	FDA-CDC-AR_0144	SRR3242003	448476	449263	+	fepC	96.57	78.17	vfdb	NP_752606	(fepC) ferrienterobactin ABC transporter ATPase [Enterobactin (VF0228)] [Escherichia coli CFT073]
Kluyvera ascorbata	FDA-CDC-AR_0144	SRR3242003	446507	447490	+	fepD	96.26	77.89	vfdb	NP_752608	(fepD) ferrienterobactin ABC transporter permease [Enterobactin (VF0228)] [Escherichia coli CFT073]
Kluyvera ascorbata	FDA-CDC-AR_0144	SRR3242003	447568	448479	+	fepG	90.63	76.3	vfdb	NP_752607	(fepG) iron-enterobactin ABC transporter permease [Enterobactin (VF0228)] [Escherichia coli CFT073]
Kluyvera ascorbata	FDA-CDC-AR_0144	SRR3242003	453470	454577	-	fes	89.44	70.07	vfdb	NP_752602	(fes) enterobactin/ferric enterobactin esterase [enterobactin (IA019)] [Escherichia coli CFT073]
Kluyvera ascorbata	FDA-CDC-AR_0144	SRR3242003	84468	85063	+	fimC	81.54	75.17	vfdb	NP_757243	(fimC) Chaperone protein fimC precursor [Type 1 fimbriae (VF0221)] [Escherichia coli CFT073]
Kluyvera ascorbata	FDA-CDC-AR_0144	SRR3242003	85266	87694	+	fimD	92	74.07	vfdb	NP_757244	(fimD) Outer membrane usher protein fimD precursor [Type 1 fimbriae (VF0221)] [Escherichia coli CFT073]
Kluyvera ascorbata	FDA-CDC-AR_0144	SRR3242003	87830	88299	+	fimF	88.01	72.13	vfdb	NP_757245	(fimF) FimF protein precursor [Type 1 fimbriae (VF0221)] [Escherichia coli CFT073]
Kluyvera ascorbata	FDA-CDC-AR_0144	SRR3242003	88377	88809	+	fimG	85.91	73.44	vfdb	NP_757247	(fimG) FimG protein precursor [Type 1 fimbriae (VF0221)] [Escherichia coli CFT073]
Kluyvera ascorbata	FDA-CDC-AR_0144	SRR3242003	88862	89735	+	fimH	95.5	75.74	vfdb	NP_757248	(fimH) FimH protein precursor [Type 1 fimbriae (VF0221)] [Escherichia coli CFT073]
Kluyvera ascorbata	FDA-CDC-AR_0144	SRR3242003	83836	84354	+	fimI	95.56	69.54	vfdb	NP_757242	(fimI) Fimbrin-like protein fimI precursor [Type 1 fimbriae (VF0221)] [Escherichia coli CFT073]
Kluyvera ascorbata	FDA-CDC-AR_0144	SRR3242003	203914	206123	+	iutA	96.75	77.51	vfdb	NP_755498	(iutA) ferric aerobactin receptor precusor IutA [Aerobactin (VF0229)] [Escherichia coli CFT073]
Kluyvera ascorbata	FDA-CDC-AR_0144	SRR3242003	96856	97911	+	ompA	100	83.62	vfdb	AAF37887	(ompA) outer membrane protein A [OmpA (VF0236)] [Escherichia coli O18:K1:H7 str. RS218]
Kluyvera ascorbata	FDA-CDC-AR_0144	SRR3242003	175203	177113	+	shuA	96.22	78.34	vfdb	YP_405019	(shuA) outer membrane heme/hemoglobin receptor ShuA [Shu (VF0256)] [Shigella dysenteriae Sd197]
Kluyvera ascorbata	FDA-CDC-AR_0144	SRR3242003	54149	54819	+	shuV	87.03	69.45	vfdb	YP_405013	(shuV) ATP-binding component of hemin transport system [Shu (VF0256)] [Shigella dysenteriae Sd197]
Kluyvera ascorbata	FDA-CDC-AR_0144	SRR3242003	52477	53100	+	shuY	99.68	72.36	vfdb	YP_405015	(shuY) shu locus protein ShuY [Shu (VF0256)] [Shigella dysenteriae Sd197]
Kluyvera ascorbata	oral taxon 865. F0526	SRR935003	229	343	+	astA	98.29	91.3	vfdb	BAA94855	(astA) heat-stable enterotoxin 1 [EAST1 (VF0216)] [Escherichia coli O44:H18 042]
Kluyvera ascorbata	oral taxon 865. F0526	SRR935003	63054	64069	+	chuS	98.25	73.95	vfdb	NP_756169	(chuS) heme oxygenase ChuS [Chu (VF0227)] [Escherichia coli CFT073]
Kluyvera ascorbata	oral taxon 865. F0526	SRR935003	53541	54523	+	chuU	98.99	73.75	vfdb	NP_756179	(chuU) heme permease protein ChuU [Chu (VF0227)] [Escherichia coli CFT073]
Kluyvera ascorbata	oral taxon 865. F0526	SRR935003	51040	52360	+	chuW	98.51	75.98	vfdb	NP_756176	(chuW) Putative oxygen independent coproporphyrinogen III oxidase [Chu (VF0227)] [Escherichia coli CFT073]
Kluyvera ascorbata	oral taxon 865. F0526	SRR935003	52373	52845	+	chuX	95.56	77.17	vfdb	NP_756177	(chuX) putative heme-binding protein ChuX [Chu (VF0227)] [Escherichia coli CFT073]
Kluyvera ascorbata	oral taxon 865. F0526	SRR935003	20509	21261	+	csgG	89.81	77.15	vfdb	NP_460110	(csgG) curli production assembly/transport protein CsgG [Agf (VF0103)] [Salmonella enterica subsp. enterica serovar Typhimurium str. LT2]
Kluyvera ascorbata	oral taxon 865. F0526	SRR935003	1047	1789	-	entA	98.93	78.18	vfdb	NP_752614	(entA) 23-dihydro-23-dihydroxybenzoate dehydrogenase [Enterobactin (VF0228)] [Escherichia coli CFT073]
Kluyvera ascorbata	oral taxon 865. F0526	SRR935003	1801	2655	-	entB	99.18	79.58	vfdb	NP_752613	(entB) isochorismatase [Enterobactin (VF0228)] [Escherichia coli CFT073]
Kluyvera ascorbata	oral taxon 865. F0526	SRR935003	4289	5481	-	entC	98.91	73.36	vfdb	NP_752611	(entC) isochorismate synthase 1 [Enterobactin (VF0228)] [Escherichia coli CFT073]
Kluyvera ascorbata	oral taxon 865. F0526	SRR935003	2687	4268	-	entE	98.08	77.97	vfdb	NP_752612	(entE) 23-dihydroxybenzoate-AMP ligase component of enterobactin synthase multienzyme complex [Enterobactin (VF0228)] [Escherichia coli CFT073]
Kluyvera ascorbata	oral taxon 865. F0526	SRR935003	8840	12649	+	entF	97.14	72.49	vfdb	NP_752604	(entF) enterobactin synthase multienzyme complex component ATP-dependent [Enterobactin (VF0228)] [Escherichia coli CFT073]
Kluyvera ascorbata	oral taxon 865. F0526	SRR935003	6757	7970	-	entS	97.04	77.84	vfdb	NP_752609	(entS) enterobactin exporter iron-regulated [enterobactin (IA019)] [Escherichia coli CFT073]
Kluyvera ascorbata	oral taxon 865. F0526	SRR935003	4926	7199	-	fepA	98.57	76.76	vfdb	NP_752600	(fepA) ferrienterobactin outer membrane transporter [Enterobactin (VF0228)] [Escherichia coli CFT073]
Kluyvera ascorbata	oral taxon 865. F0526	SRR935003	5755	6622	+	fepB	90.7	79.03	vfdb	NP_752610	(fepB) ferrienterobactin ABC transporter periplasmic binding protein [Enterobactin (VF0228)] [Escherichia coli CFT073]
Kluyvera ascorbata	oral taxon 865. F0526	SRR935003	10074	10861	+	fepC	96.57	78.68	vfdb	NP_752606	(fepC) ferrienterobactin ABC transporter ATPase [Enterobactin (VF0228)] [Escherichia coli CFT073]
Kluyvera ascorbata	oral taxon 865. F0526	SRR935003	8105	9088	+	fepD	96.26	77.89	vfdb	NP_752608	(fepD) ferrienterobactin ABC transporter permease [Enterobactin (VF0228)] [Escherichia coli CFT073]
Kluyvera ascorbata	oral taxon 865. F0526	SRR935003	9166	10077	+	fepG	90.63	76.19	vfdb	NP_752607	(fepG) iron-enterobactin ABC transporter permease [Enterobactin (VF0228)] [Escherichia coli CFT073]
Kluyvera ascorbata	oral taxon 865. F0526	SRR935003	7403	8586	+	fes	95.93	69.33	vfdb	NP_752602	(fes) enterobactin/ferric enterobactin esterase [enterobactin (IA019)] [Escherichia coli CFT073]
Kluyvera ascorbata	oral taxon 865. F0526	SRR935003	71876	72471	-	fimC	81.54	75	vfdb	NP_757243	(fimC) Chaperone protein fimC precursor [Type 1 fimbriae (VF0221)] [Escherichia coli CFT073]
Kluyvera ascorbata	oral taxon 865. F0526	SRR935003	69245	71673	-	fimD	92	74.27	vfdb	NP_757244	(fimD) Outer membrane usher protein fimD precursor [Type 1 fimbriae (VF0221)] [Escherichia coli CFT073]
Kluyvera ascorbata	oral taxon 865. F0526	SRR935003	68640	69109	-	fimF	88.01	71.92	vfdb	NP_757245	(fimF) FimF protein precursor [Type 1 fimbriae (VF0221)] [Escherichia coli CFT073]
Kluyvera ascorbata	oral taxon 865. F0526	SRR935003	68130	68562	-	fimG	85.91	74.13	vfdb	NP_757247	(fimG) FimG protein precursor [Type 1 fimbriae (VF0221)] [Escherichia coli CFT073]
Kluyvera ascorbata	oral taxon 865. F0526	SRR935003	67204	68077	-	fimH	95.5	76.32	vfdb	NP_757248	(fimH) FimH protein precursor [Type 1 fimbriae (VF0221)] [Escherichia coli CFT073]
Kluyvera ascorbata	oral taxon 865. F0526	SRR935003	72585	73103	-	fimI	95.56	69.92	vfdb	NP_757242	(fimI) Fimbrin-like protein fimI precursor [Type 1 fimbriae (VF0221)] [Escherichia coli CFT073]
Kluyvera ascorbata	oral taxon 865. F0526	SRR935003	24797	27006	+	iutA	96.8	77.95	vfdb	NP_755498	(iutA) ferric aerobactin receptor precusor IutA [Aerobactin (VF0229)] [Escherichia coli CFT073]
Kluyvera ascorbata	oral taxon 865. F0526	SRR935003	29943	31533	-	kpsD	94.22	72.03	vfdb	AAA21682	(kpsD) KpsD [K1 capsule (VF0239)] [Escherichia coli O18:K1:H7 str. RS218]
Kluyvera ascorbata	oral taxon 865. F0526	SRR935003	22428	23204	+	kpsM	99.61	68.46	vfdb	AAA24046	(kpsM) KpsM [K1 capsule (VF0239)] [Escherichia coli O18:K1:H7 str. RS218]
Kluyvera ascorbata	oral taxon 865. F0526	SRR935003	16473	17528	+	ompA	100	83.81	vfdb	AAF37887	(ompA) outer membrane protein A [OmpA (VF0236)] [Escherichia coli O18:K1:H7 str. RS218]
Kluyvera ascorbata	oral taxon 865. F0526	SRR935003	61095	63005	+	shuA	96.17	78.61	vfdb	YP_405019	(shuA) outer membrane heme/hemoglobin receptor ShuA [Shu (VF0256)] [Shigella dysenteriae Sd197]
Kluyvera ascorbata	oral taxon 865. F0526	SRR935003	54539	55209	+	shuV	87.03	69.9	vfdb	YP_405013	(shuV) ATP-binding component of hemin transport system [Shu (VF0256)] [Shigella dysenteriae Sd197]
Kluyvera ascorbata	oral taxon 865. F0526	SRR935003	52867	53490	+	shuY	99.68	72.68	vfdb	YP_405015	(shuY) shu locus protein ShuY [Shu (VF0256)] [Shigella dysenteriae Sd197]
Kluyvera cryocrescens	missing	DRR015589	1889	3189	-	aslA	91.04	80.4	vfdb	AAG10151	(aslA) putative arylsulfatase [AslA (VF0238)] [Escherichia coli O18:K1:H7 str. RS218]
Kluyvera cryocrescens	missing	DRR015589	57318	58255	+	chuS	90.77	74.63	vfdb	NP_756169	(chuS) heme oxygenase ChuS [Chu (VF0227)] [Escherichia coli CFT073]
Kluyvera cryocrescens	missing	DRR015589	33281	34263	+	chuU	98.49	74.59	vfdb	NP_756179	(chuU) heme permease protein ChuU [Chu (VF0227)] [Escherichia coli CFT073]
Kluyvera cryocrescens	missing	DRR015589	34241	34889	+	chuV	80.9	74.31	vfdb	NP_756180	(chuV) ATP-binding hydrophilic protein ChuV [Chu (VF0227)] [Escherichia coli CFT073]
Kluyvera cryocrescens	missing	DRR015589	30778	32097	+	chuW	98.58	76.76	vfdb	NP_756176	(chuW) Putative oxygen independent coproporphyrinogen III oxidase [Chu (VF0227)] [Escherichia coli CFT073]
Kluyvera cryocrescens	missing	DRR015589	32110	32547	+	chuX	88.48	79	vfdb	NP_756177	(chuX) putative heme-binding protein ChuX [Chu (VF0227)] [Escherichia coli CFT073]
Kluyvera cryocrescens	missing	DRR015589	32604	33227	+	chuY	99.04	72.86	vfdb	NP_756178	(chuY) ChuY [Chu (VF0227)] [Escherichia coli CFT073]
Kluyvera cryocrescens	missing	DRR015589	19065	19776	-	csgG	85.37	76.69	vfdb	NP_460110	(csgG) curli production assembly/transport protein CsgG [Agf (VF0103)] [Salmonella enterica subsp. enterica serovar Typhimurium str. LT2]
Kluyvera cryocrescens	missing	DRR015589	6383	7124	-	entA	99.33	78.3	vfdb	NP_752614	(entA) 23-dihydro-23-dihydroxybenzoate dehydrogenase [Enterobactin (VF0228)] [Escherichia coli CFT073]
Kluyvera cryocrescens	missing	DRR015589	7134	7988	-	entB	99.65	79.02	vfdb	NP_752613	(entB) isochorismatase [Enterobactin (VF0228)] [Escherichia coli CFT073]
Kluyvera cryocrescens	missing	DRR015589	9629	10820	-	entC	99.33	74.04	vfdb	NP_752611	(entC) isochorismate synthase 1 [Enterobactin (VF0228)] [Escherichia coli CFT073]
Kluyvera cryocrescens	missing	DRR015589	8021	9601	-	entE	97.89	77.41	vfdb	NP_752612	(entE) 23-dihydroxybenzoate-AMP ligase component of enterobactin synthase multienzyme complex [Enterobactin (VF0228)] [Escherichia coli CFT073]
Kluyvera cryocrescens	missing	DRR015589	16425	20233	-	entF	97.3	72.98	vfdb	NP_752604	(entF) enterobactin synthase multienzyme complex component ATP-dependent [Enterobactin (VF0228)] [Escherichia coli CFT073]
Kluyvera cryocrescens	missing	DRR015589	12084	13295	-	entS	96.88	76.07	vfdb	NP_752609	(entS) enterobactin exporter iron-regulated [enterobactin (IA019)] [Escherichia coli CFT073]
Kluyvera cryocrescens	missing	DRR015589	22058	24223	+	fepA	94.33	78.67	vfdb	NP_752600	(fepA) ferrienterobactin outer membrane transporter [Enterobactin (VF0228)] [Escherichia coli CFT073]
Kluyvera cryocrescens	missing	DRR015589	11082	11963	+	fepB	92.06	78.48	vfdb	NP_752610	(fepB) ferrienterobactin ABC transporter periplasmic binding protein [Enterobactin (VF0228)] [Escherichia coli CFT073]
Kluyvera cryocrescens	missing	DRR015589	15398	16185	+	fepC	96.45	79.09	vfdb	NP_752606	(fepC) ferrienterobactin ABC transporter ATPase [Enterobactin (VF0228)] [Escherichia coli CFT073]
Kluyvera cryocrescens	missing	DRR015589	13492	14412	+	fepD	89.97	76.19	vfdb	NP_752608	(fepD) ferrienterobactin ABC transporter permease [Enterobactin (VF0228)] [Escherichia coli CFT073]
Kluyvera cryocrescens	missing	DRR015589	14490	15401	+	fepG	91.34	76.66	vfdb	NP_752607	(fepG) iron-enterobactin ABC transporter permease [Enterobactin (VF0228)] [Escherichia coli CFT073]
Kluyvera cryocrescens	missing	DRR015589	20519	21596	-	fes	87.78	71.52	vfdb	NP_752602	(fes) enterobactin/ferric enterobactin esterase [enterobactin (IA019)] [Escherichia coli CFT073]
Kluyvera cryocrescens	missing	DRR015589	114330	114850	+	fimA	84.82	72	vfdb	NP_757241	(fimA) Type-1 fimbrial protein A chain precursor [Type 1 fimbriae (VF0221)] [Escherichia coli CFT073]
Kluyvera cryocrescens	missing	DRR015589	115600	116201	+	fimC	82.92	74.09	vfdb	NP_757243	(fimC) Chaperone protein fimC precursor [Type 1 fimbriae (VF0221)] [Escherichia coli CFT073]
Kluyvera cryocrescens	missing	DRR015589	116431	118844	+	fimD	91.47	75.62	vfdb	NP_757244	(fimD) Outer membrane usher protein fimD precursor [Type 1 fimbriae (VF0221)] [Escherichia coli CFT073]
Kluyvera cryocrescens	missing	DRR015589	119006	119473	+	fimF	87.64	69.02	vfdb	NP_757245	(fimF) FimF protein precursor [Type 1 fimbriae (VF0221)] [Escherichia coli CFT073]
Kluyvera cryocrescens	missing	DRR015589	119552	119989	+	fimG	86.9	75.57	vfdb	NP_757247	(fimG) FimG protein precursor [Type 1 fimbriae (VF0221)] [Escherichia coli CFT073]
Kluyvera cryocrescens	missing	DRR015589	120006	120907	+	fimH	98.36	74.23	vfdb	NP_757248	(fimH) FimH protein precursor [Type 1 fimbriae (VF0221)] [Escherichia coli CFT073]
Kluyvera cryocrescens	missing	DRR015589	114960	115465	+	fimI	93.7	69.76	vfdb	NP_757242	(fimI) Fimbrin-like protein fimI precursor [Type 1 fimbriae (VF0221)] [Escherichia coli CFT073]
Kluyvera cryocrescens	missing	DRR015589	9120	11329	+	iutA	96.93	78.19	vfdb	NP_755498	(iutA) ferric aerobactin receptor precusor IutA [Aerobactin (VF0229)] [Escherichia coli CFT073]
Kluyvera cryocrescens	missing	DRR015589	242431	244036	+	kpsD	95.53	71.67	vfdb	AAA21682	(kpsD) KpsD [K1 capsule (VF0239)] [Escherichia coli O18:K1:H7 str. RS218]
Kluyvera cryocrescens	missing	DRR015589	596	1249	-	kpsM	83.4	66.67	vfdb	AAA24046	(kpsM) KpsM [K1 capsule (VF0239)] [Escherichia coli O18:K1:H7 str. RS218]
Kluyvera cryocrescens	missing	DRR015589	64698	65753	-	ompA	100	84.47	vfdb	AAF37887	(ompA) outer membrane protein A [OmpA (VF0236)] [Escherichia coli O18:K1:H7 str. RS218]
Kluyvera cryocrescens	missing	ERR1950691	48389	49689	-	aslA	91.04	80.63	vfdb	AAG10151	(aslA) putative arylsulfatase [AslA (VF0238)] [Escherichia coli O18:K1:H7 str. RS218]
Kluyvera cryocrescens	missing	ERR1950691	26629	27566	+	chuS	90.77	74.52	vfdb	NP_756169	(chuS) heme oxygenase ChuS [Chu (VF0227)] [Escherichia coli CFT073]
Kluyvera cryocrescens	missing	ERR1950691	28511	29493	-	chuU	98.49	74.49	vfdb	NP_756179	(chuU) heme permease protein ChuU [Chu (VF0227)] [Escherichia coli CFT073]
Kluyvera cryocrescens	missing	ERR1950691	27885	28533	-	chuV	80.9	74.15	vfdb	NP_756180	(chuV) ATP-binding hydrophilic protein ChuV [Chu (VF0227)] [Escherichia coli CFT073]
Kluyvera cryocrescens	missing	ERR1950691	30677	31996	-	chuW	98.58	76.91	vfdb	NP_756176	(chuW) Putative oxygen independent coproporphyrinogen III oxidase [Chu (VF0227)] [Escherichia coli CFT073]
Kluyvera cryocrescens	missing	ERR1950691	30227	30664	-	chuX	88.48	78.77	vfdb	NP_756177	(chuX) putative heme-binding protein ChuX [Chu (VF0227)] [Escherichia coli CFT073]
Kluyvera cryocrescens	missing	ERR1950691	29547	30170	-	chuY	99.04	72.7	vfdb	NP_756178	(chuY) ChuY [Chu (VF0227)] [Escherichia coli CFT073]
Kluyvera cryocrescens	missing	ERR1950691	26024	26735	-	csgG	85.37	76.83	vfdb	NP_460110	(csgG) curli production assembly/transport protein CsgG [Agf (VF0103)] [Salmonella enterica subsp. enterica serovar Typhimurium str. LT2]
Kluyvera cryocrescens	missing	ERR1950691	246610	247351	-	entA	99.33	78.44	vfdb	NP_752614	(entA) 23-dihydro-23-dihydroxybenzoate dehydrogenase [Enterobactin (VF0228)] [Escherichia coli CFT073]
Kluyvera cryocrescens	missing	ERR1950691	247361	248215	-	entB	99.65	79.25	vfdb	NP_752613	(entB) isochorismatase [Enterobactin (VF0228)] [Escherichia coli CFT073]
Kluyvera cryocrescens	missing	ERR1950691	249856	251047	-	entC	98.99	74.38	vfdb	NP_752611	(entC) isochorismate synthase 1 [Enterobactin (VF0228)] [Escherichia coli CFT073]
Kluyvera cryocrescens	missing	ERR1950691	248248	249828	-	entE	97.58	77.48	vfdb	NP_752612	(entE) 23-dihydroxybenzoate-AMP ligase component of enterobactin synthase multienzyme complex [Enterobactin (VF0228)] [Escherichia coli CFT073]
Kluyvera cryocrescens	missing	ERR1950691	256651	260459	-	entF	97.19	72.95	vfdb	NP_752604	(entF) enterobactin synthase multienzyme complex component ATP-dependent [Enterobactin (VF0228)] [Escherichia coli CFT073]
Kluyvera cryocrescens	missing	ERR1950691	252311	253522	-	entS	96.88	75.99	vfdb	NP_752609	(entS) enterobactin exporter iron-regulated [enterobactin (IA019)] [Escherichia coli CFT073]
Kluyvera cryocrescens	missing	ERR1950691	262284	264437	+	fepA	94.51	78.28	vfdb	NP_752600	(fepA) ferrienterobactin outer membrane transporter [Enterobactin (VF0228)] [Escherichia coli CFT073]
Kluyvera cryocrescens	missing	ERR1950691	251309	252190	+	fepB	92.06	78.37	vfdb	NP_752610	(fepB) ferrienterobactin ABC transporter periplasmic binding protein [Enterobactin (VF0228)] [Escherichia coli CFT073]
Kluyvera cryocrescens	missing	ERR1950691	255625	256412	+	fepC	96.45	79.09	vfdb	NP_752606	(fepC) ferrienterobactin ABC transporter ATPase [Enterobactin (VF0228)] [Escherichia coli CFT073]
Kluyvera cryocrescens	missing	ERR1950691	253719	254639	+	fepD	89.97	75.87	vfdb	NP_752608	(fepD) ferrienterobactin ABC transporter permease [Enterobactin (VF0228)] [Escherichia coli CFT073]
Kluyvera cryocrescens	missing	ERR1950691	254717	255628	+	fepG	91.84	76.64	vfdb	NP_752607	(fepG) iron-enterobactin ABC transporter permease [Enterobactin (VF0228)] [Escherichia coli CFT073]
Kluyvera cryocrescens	missing	ERR1950691	260745	261822	-	fes	87.78	71.24	vfdb	NP_752602	(fes) enterobactin/ferric enterobactin esterase [enterobactin (IA019)] [Escherichia coli CFT073]
Kluyvera cryocrescens	missing	ERR1950691	6158	6678	-	fimA	84.98	71.76	vfdb	NP_757241	(fimA) Type-1 fimbrial protein A chain precursor [Type 1 fimbriae (VF0221)] [Escherichia coli CFT073]
Kluyvera cryocrescens	missing	ERR1950691	4807	5408	-	fimC	82.92	73.92	vfdb	NP_757243	(fimC) Chaperone protein fimC precursor [Type 1 fimbriae (VF0221)] [Escherichia coli CFT073]
Kluyvera cryocrescens	missing	ERR1950691	2164	4577	-	fimD	91.47	75.54	vfdb	NP_757244	(fimD) Outer membrane usher protein fimD precursor [Type 1 fimbriae (VF0221)] [Escherichia coli CFT073]
Kluyvera cryocrescens	missing	ERR1950691	1535	2002	-	fimF	87.64	69.44	vfdb	NP_757245	(fimF) FimF protein precursor [Type 1 fimbriae (VF0221)] [Escherichia coli CFT073]
Kluyvera cryocrescens	missing	ERR1950691	1019	1456	-	fimG	86.9	75.57	vfdb	NP_757247	(fimG) FimG protein precursor [Type 1 fimbriae (VF0221)] [Escherichia coli CFT073]
Kluyvera cryocrescens	missing	ERR1950691	103	969	-	fimH	95.07	74.86	vfdb	NP_757248	(fimH) FimH protein precursor [Type 1 fimbriae (VF0221)] [Escherichia coli CFT073]
Kluyvera cryocrescens	missing	ERR1950691	5543	6048	-	fimI	93.7	69.56	vfdb	NP_757242	(fimI) Fimbrin-like protein fimI precursor [Type 1 fimbriae (VF0221)] [Escherichia coli CFT073]
Kluyvera cryocrescens	missing	ERR1950691	968	3177	+	iutA	96.93	78.19	vfdb	NP_755498	(iutA) ferric aerobactin receptor precusor IutA [Aerobactin (VF0229)] [Escherichia coli CFT073]
Kluyvera cryocrescens	missing	ERR1950691	132875	134480	+	kpsD	95.65	71.69	vfdb	AAA21682	(kpsD) KpsD [K1 capsule (VF0239)] [Escherichia coli O18:K1:H7 str. RS218]
Kluyvera cryocrescens	missing	ERR1950691	143953	144606	-	kpsM	83.66	69.15	vfdb	AAA24046	(kpsM) KpsM [K1 capsule (VF0239)] [Escherichia coli O18:K1:H7 str. RS218]
Kluyvera cryocrescens	missing	ERR1950691	143295	143875	-	kpsT	86.97	69.22	vfdb	AAA24047	(kpsT) KpsT [K1 capsule (VF0239)] [Escherichia coli O18:K1:H7 str. RS218]
Kluyvera cryocrescens	missing	ERR1950691	28568	29623	+	ompA	100	84.47	vfdb	AAF37887	(ompA) outer membrane protein A [OmpA (VF0236)] [Escherichia coli O18:K1:H7 str. RS218]
Kluyvera cryocrescens	missing	ERR1950702	32413	33713	-	aslA	91.04	80.25	vfdb	AAG10151	(aslA) putative arylsulfatase [AslA (VF0238)] [Escherichia coli O18:K1:H7 str. RS218]
Kluyvera cryocrescens	missing	ERR1950702	293723	294660	-	chuS	90.77	74.73	vfdb	NP_756169	(chuS) heme oxygenase ChuS [Chu (VF0227)] [Escherichia coli CFT073]
Kluyvera cryocrescens	missing	ERR1950702	380561	381543	-	chuU	98.49	74.39	vfdb	NP_756179	(chuU) heme permease protein ChuU [Chu (VF0227)] [Escherichia coli CFT073]
Kluyvera cryocrescens	missing	ERR1950702	379935	380583	-	chuV	80.9	74.31	vfdb	NP_756180	(chuV) ATP-binding hydrophilic protein ChuV [Chu (VF0227)] [Escherichia coli CFT073]
Kluyvera cryocrescens	missing	ERR1950702	382727	384046	-	chuW	98.58	76.91	vfdb	NP_756176	(chuW) Putative oxygen independent coproporphyrinogen III oxidase [Chu (VF0227)] [Escherichia coli CFT073]
Kluyvera cryocrescens	missing	ERR1950702	382277	382714	-	chuX	88.48	78.77	vfdb	NP_756177	(chuX) putative heme-binding protein ChuX [Chu (VF0227)] [Escherichia coli CFT073]
Kluyvera cryocrescens	missing	ERR1950702	381597	382220	-	chuY	99.04	72.7	vfdb	NP_756178	(chuY) ChuY [Chu (VF0227)] [Escherichia coli CFT073]
Kluyvera cryocrescens	missing	ERR1950702	110148	110859	+	csgG	85.37	76.69	vfdb	NP_460110	(csgG) curli production assembly/transport protein CsgG [Agf (VF0103)] [Salmonella enterica subsp. enterica serovar Typhimurium str. LT2]
Kluyvera cryocrescens	missing	ERR1950702	287316	288057	-	entA	99.33	78.3	vfdb	NP_752614	(entA) 23-dihydro-23-dihydroxybenzoate dehydrogenase [Enterobactin (VF0228)] [Escherichia coli CFT073]
Kluyvera cryocrescens	missing	ERR1950702	288067	288921	-	entB	99.65	79.14	vfdb	NP_752613	(entB) isochorismatase [Enterobactin (VF0228)] [Escherichia coli CFT073]
Kluyvera cryocrescens	missing	ERR1950702	290562	291753	-	entC	99.33	74.04	vfdb	NP_752611	(entC) isochorismate synthase 1 [Enterobactin (VF0228)] [Escherichia coli CFT073]
Kluyvera cryocrescens	missing	ERR1950702	288954	290534	-	entE	97.58	77.42	vfdb	NP_752612	(entE) 23-dihydroxybenzoate-AMP ligase component of enterobactin synthase multienzyme complex [Enterobactin (VF0228)] [Escherichia coli CFT073]
Kluyvera cryocrescens	missing	ERR1950702	297366	301174	-	entF	97.27	72.86	vfdb	NP_752604	(entF) enterobactin synthase multienzyme complex component ATP-dependent [Enterobactin (VF0228)] [Escherichia coli CFT073]
Kluyvera cryocrescens	missing	ERR1950702	293016	294227	-	entS	96.88	76.16	vfdb	NP_752609	(entS) enterobactin exporter iron-regulated [enterobactin (IA019)] [Escherichia coli CFT073]
Kluyvera cryocrescens	missing	ERR1950702	302999	305164	+	fepA	94.33	78.53	vfdb	NP_752600	(fepA) ferrienterobactin outer membrane transporter [Enterobactin (VF0228)] [Escherichia coli CFT073]
Kluyvera cryocrescens	missing	ERR1950702	292014	292895	+	fepB	92.06	78.37	vfdb	NP_752610	(fepB) ferrienterobactin ABC transporter periplasmic binding protein [Enterobactin (VF0228)] [Escherichia coli CFT073]
Kluyvera cryocrescens	missing	ERR1950702	296330	297117	+	fepC	96.45	77.57	vfdb	NP_752606	(fepC) ferrienterobactin ABC transporter ATPase [Enterobactin (VF0228)] [Escherichia coli CFT073]
Kluyvera cryocrescens	missing	ERR1950702	294424	295344	+	fepD	89.97	76.3	vfdb	NP_752608	(fepD) ferrienterobactin ABC transporter permease [Enterobactin (VF0228)] [Escherichia coli CFT073]
Kluyvera cryocrescens	missing	ERR1950702	295422	296333	+	fepG	91.54	76.17	vfdb	NP_752607	(fepG) iron-enterobactin ABC transporter permease [Enterobactin (VF0228)] [Escherichia coli CFT073]
Kluyvera cryocrescens	missing	ERR1950702	301460	302537	-	fes	87.78	71.61	vfdb	NP_752602	(fes) enterobactin/ferric enterobactin esterase [enterobactin (IA019)] [Escherichia coli CFT073]
Kluyvera cryocrescens	missing	ERR1950702	25651	26171	+	fimA	84.82	71.81	vfdb	NP_757241	(fimA) Type-1 fimbrial protein A chain precursor [Type 1 fimbriae (VF0221)] [Escherichia coli CFT073]
Kluyvera cryocrescens	missing	ERR1950702	26921	27522	+	fimC	82.92	74.09	vfdb	NP_757243	(fimC) Chaperone protein fimC precursor [Type 1 fimbriae (VF0221)] [Escherichia coli CFT073]
Kluyvera cryocrescens	missing	ERR1950702	27752	30165	+	fimD	91.47	75.37	vfdb	NP_757244	(fimD) Outer membrane usher protein fimD precursor [Type 1 fimbriae (VF0221)] [Escherichia coli CFT073]
Kluyvera cryocrescens	missing	ERR1950702	30327	30794	+	fimF	87.64	69.23	vfdb	NP_757245	(fimF) FimF protein precursor [Type 1 fimbriae (VF0221)] [Escherichia coli CFT073]
Kluyvera cryocrescens	missing	ERR1950702	30873	31310	+	fimG	86.9	75.8	vfdb	NP_757247	(fimG) FimG protein precursor [Type 1 fimbriae (VF0221)] [Escherichia coli CFT073]
Kluyvera cryocrescens	missing	ERR1950702	31360	32228	+	fimH	95.29	74.8	vfdb	NP_757248	(fimH) FimH protein precursor [Type 1 fimbriae (VF0221)] [Escherichia coli CFT073]
Kluyvera cryocrescens	missing	ERR1950702	26281	26786	+	fimI	93.7	69.56	vfdb	NP_757242	(fimI) Fimbrin-like protein fimI precursor [Type 1 fimbriae (VF0221)] [Escherichia coli CFT073]
Kluyvera cryocrescens	missing	ERR1950702	9212	11421	-	iutA	96.93	78.1	vfdb	NP_755498	(iutA) ferric aerobactin receptor precusor IutA [Aerobactin (VF0229)] [Escherichia coli CFT073]
Kluyvera cryocrescens	missing	ERR1950702	81579	83184	-	kpsD	95.53	71.48	vfdb	AAA21682	(kpsD) KpsD [K1 capsule (VF0239)] [Escherichia coli O18:K1:H7 str. RS218]
Kluyvera cryocrescens	missing	ERR1950702	71452	72105	+	kpsM	83.66	68.84	vfdb	AAA24046	(kpsM) KpsM [K1 capsule (VF0239)] [Escherichia coli O18:K1:H7 str. RS218]
Kluyvera cryocrescens	missing	ERR1950702	72183	72763	+	kpsT	86.97	69.05	vfdb	AAA24047	(kpsT) KpsT [K1 capsule (VF0239)] [Escherichia coli O18:K1:H7 str. RS218]
Kluyvera cryocrescens	missing	ERR1950702	22477	23532	-	ompA	100	84.47	vfdb	AAF37887	(ompA) outer membrane protein A [OmpA (VF0236)] [Escherichia coli O18:K1:H7 str. RS218]
Kluyvera cryocrescens	NCTC 10484	ERR2532114	97783	99083	+	aslA	91.04	80.4	vfdb	AAG10151	(aslA) putative arylsulfatase [AslA (VF0238)] [Escherichia coli O18:K1:H7 str. RS218]
Kluyvera cryocrescens	NCTC 10484	ERR2532114	214880	215817	-	chuS	90.77	74.84	vfdb	NP_756169	(chuS) heme oxygenase ChuS [Chu (VF0227)] [Escherichia coli CFT073]
Kluyvera cryocrescens	NCTC 10484	ERR2532114	304462	305444	-	chuU	98.49	74.29	vfdb	NP_756179	(chuU) heme permease protein ChuU [Chu (VF0227)] [Escherichia coli CFT073]
Kluyvera cryocrescens	NCTC 10484	ERR2532114	303836	304484	-	chuV	80.9	74.61	vfdb	NP_756180	(chuV) ATP-binding hydrophilic protein ChuV [Chu (VF0227)] [Escherichia coli CFT073]
Kluyvera cryocrescens	NCTC 10484	ERR2532114	306628	307947	-	chuW	98.58	77.06	vfdb	NP_756176	(chuW) Putative oxygen independent coproporphyrinogen III oxidase [Chu (VF0227)] [Escherichia coli CFT073]
Kluyvera cryocrescens	NCTC 10484	ERR2532114	306178	306615	-	chuX	88.48	79	vfdb	NP_756177	(chuX) putative heme-binding protein ChuX [Chu (VF0227)] [Escherichia coli CFT073]
Kluyvera cryocrescens	NCTC 10484	ERR2532114	305498	306121	-	chuY	99.04	72.7	vfdb	NP_756178	(chuY) ChuY [Chu (VF0227)] [Escherichia coli CFT073]
Kluyvera cryocrescens	NCTC 10484	ERR2532114	227782	228493	-	csgG	85.37	76.69	vfdb	NP_460110	(csgG) curli production assembly/transport protein CsgG [Agf (VF0103)] [Salmonella enterica subsp. enterica serovar Typhimurium str. LT2]
Kluyvera cryocrescens	NCTC 10484	ERR2532114	816958	817699	-	entA	99.33	78.44	vfdb	NP_752614	(entA) 23-dihydro-23-dihydroxybenzoate dehydrogenase [Enterobactin (VF0228)] [Escherichia coli CFT073]
Kluyvera cryocrescens	NCTC 10484	ERR2532114	817709	818563	-	entB	99.65	79.14	vfdb	NP_752613	(entB) isochorismatase [Enterobactin (VF0228)] [Escherichia coli CFT073]
Kluyvera cryocrescens	NCTC 10484	ERR2532114	820204	821395	-	entC	99.33	73.87	vfdb	NP_752611	(entC) isochorismate synthase 1 [Enterobactin (VF0228)] [Escherichia coli CFT073]
Kluyvera cryocrescens	NCTC 10484	ERR2532114	818596	820176	-	entE	97.58	77.48	vfdb	NP_752612	(entE) 23-dihydroxybenzoate-AMP ligase component of enterobactin synthase multienzyme complex [Enterobactin (VF0228)] [Escherichia coli CFT073]
Kluyvera cryocrescens	NCTC 10484	ERR2532114	827004	830812	-	entF	97.27	72.88	vfdb	NP_752604	(entF) enterobactin synthase multienzyme complex component ATP-dependent [Enterobactin (VF0228)] [Escherichia coli CFT073]
Kluyvera cryocrescens	NCTC 10484	ERR2532114	822657	823867	-	entS	96.56	76.46	vfdb	NP_752609	(entS) enterobactin exporter iron-regulated [enterobactin (IA019)] [Escherichia coli CFT073]
Kluyvera cryocrescens	NCTC 10484	ERR2532114	832637	834803	+	fepA	94.29	78.51	vfdb	NP_752600	(fepA) ferrienterobactin outer membrane transporter [Enterobactin (VF0228)] [Escherichia coli CFT073]
Kluyvera cryocrescens	NCTC 10484	ERR2532114	821657	822536	+	fepB	91.85	77.24	vfdb	NP_752610	(fepB) ferrienterobactin ABC transporter periplasmic binding protein [Enterobactin (VF0228)] [Escherichia coli CFT073]
Kluyvera cryocrescens	NCTC 10484	ERR2532114	825968	826755	+	fepC	96.45	77.57	vfdb	NP_752606	(fepC) ferrienterobactin ABC transporter ATPase [Enterobactin (VF0228)] [Escherichia coli CFT073]
Kluyvera cryocrescens	NCTC 10484	ERR2532114	824062	824982	+	fepD	89.97	76.3	vfdb	NP_752608	(fepD) ferrienterobactin ABC transporter permease [Enterobactin (VF0228)] [Escherichia coli CFT073]
Kluyvera cryocrescens	NCTC 10484	ERR2532114	825060	825971	+	fepG	91.34	76.66	vfdb	NP_752607	(fepG) iron-enterobactin ABC transporter permease [Enterobactin (VF0228)] [Escherichia coli CFT073]
Kluyvera cryocrescens	NCTC 10484	ERR2532114	831098	832175	-	fes	87.78	71.52	vfdb	NP_752602	(fes) enterobactin/ferric enterobactin esterase [enterobactin (IA019)] [Escherichia coli CFT073]
Kluyvera cryocrescens	NCTC 10484	ERR2532114	1040073	1040593	+	fimA	84.82	72	vfdb	NP_757241	(fimA) Type-1 fimbrial protein A chain precursor [Type 1 fimbriae (VF0221)] [Escherichia coli CFT073]
Kluyvera cryocrescens	NCTC 10484	ERR2532114	1041342	1041943	+	fimC	82.92	74.25	vfdb	NP_757243	(fimC) Chaperone protein fimC precursor [Type 1 fimbriae (VF0221)] [Escherichia coli CFT073]
Kluyvera cryocrescens	NCTC 10484	ERR2532114	1042173	1044585	+	fimD	91.43	75.37	vfdb	NP_757244	(fimD) Outer membrane usher protein fimD precursor [Type 1 fimbriae (VF0221)] [Escherichia coli CFT073]
Kluyvera cryocrescens	NCTC 10484	ERR2532114	1044745	1045212	+	fimF	87.64	69.02	vfdb	NP_757245	(fimF) FimF protein precursor [Type 1 fimbriae (VF0221)] [Escherichia coli CFT073]
Kluyvera cryocrescens	NCTC 10484	ERR2532114	1045291	1045728	+	fimG	86.9	75.57	vfdb	NP_757247	(fimG) FimG protein precursor [Type 1 fimbriae (VF0221)] [Escherichia coli CFT073]
Kluyvera cryocrescens	NCTC 10484	ERR2532114	1045778	1046646	+	fimH	95.29	74.8	vfdb	NP_757248	(fimH) FimH protein precursor [Type 1 fimbriae (VF0221)] [Escherichia coli CFT073]
Kluyvera cryocrescens	NCTC 10484	ERR2532114	1040703	1041208	+	fimI	93.7	69.37	vfdb	NP_757242	(fimI) Fimbrin-like protein fimI precursor [Type 1 fimbriae (VF0221)] [Escherichia coli CFT073]
Kluyvera cryocrescens	NCTC 10484	ERR2532114	1105404	1107613	+	iutA	96.93	78.14	vfdb	NP_755498	(iutA) ferric aerobactin receptor precusor IutA [Aerobactin (VF0229)] [Escherichia coli CFT073]
Kluyvera cryocrescens	NCTC 10484	ERR2532114	435429	436484	+	ompA	100	84.47	vfdb	AAF37887	(ompA) outer membrane protein A [OmpA (VF0236)] [Escherichia coli O18:K1:H7 str. RS218]
Kluyvera cryocrescens	NBRC 102467	GCA_001571285.1	47299	48599	+	aslA	91.04	80.63	vfdb	AAG10151	(aslA) putative arylsulfatase [AslA (VF0238)] [Escherichia coli O18:K1:H7 str. RS218]
Kluyvera cryocrescens	NBRC 102467	GCA_001571285.1	26264	27201	+	chuS	90.77	74.52	vfdb	NP_756169	(chuS) heme oxygenase ChuS [Chu (VF0227)] [Escherichia coli CFT073]
Kluyvera cryocrescens	NBRC 102467	GCA_001571285.1	59630	60612	-	chuU	98.49	74.49	vfdb	NP_756179	(chuU) heme permease protein ChuU [Chu (VF0227)] [Escherichia coli CFT073]
Kluyvera cryocrescens	NBRC 102467	GCA_001571285.1	59004	59652	-	chuV	80.9	74.15	vfdb	NP_756180	(chuV) ATP-binding hydrophilic protein ChuV [Chu (VF0227)] [Escherichia coli CFT073]
Kluyvera cryocrescens	NBRC 102467	GCA_001571285.1	61796	63115	-	chuW	98.58	76.91	vfdb	NP_756176	(chuW) Putative oxygen independent coproporphyrinogen III oxidase [Chu (VF0227)] [Escherichia coli CFT073]
Kluyvera cryocrescens	NBRC 102467	GCA_001571285.1	61346	61783	-	chuX	88.48	78.77	vfdb	NP_756177	(chuX) putative heme-binding protein ChuX [Chu (VF0227)] [Escherichia coli CFT073]
Kluyvera cryocrescens	NBRC 102467	GCA_001571285.1	60666	61289	-	chuY	99.04	72.7	vfdb	NP_756178	(chuY) ChuY [Chu (VF0227)] [Escherichia coli CFT073]
Kluyvera cryocrescens	NBRC 102467	GCA_001571285.1	110573	111284	+	csgG	85.37	76.83	vfdb	NP_460110	(csgG) curli production assembly/transport protein CsgG [Agf (VF0103)] [Salmonella enterica subsp. enterica serovar Typhimurium str. LT2]
Kluyvera cryocrescens	NBRC 102467	GCA_001571285.1	7365	8106	-	entA	99.33	78.44	vfdb	NP_752614	(entA) 23-dihydro-23-dihydroxybenzoate dehydrogenase [Enterobactin (VF0228)] [Escherichia coli CFT073]
Kluyvera cryocrescens	NBRC 102467	GCA_001571285.1	8116	8970	-	entB	99.65	79.25	vfdb	NP_752613	(entB) isochorismatase [Enterobactin (VF0228)] [Escherichia coli CFT073]
Kluyvera cryocrescens	NBRC 102467	GCA_001571285.1	10611	11802	-	entC	98.99	74.38	vfdb	NP_752611	(entC) isochorismate synthase 1 [Enterobactin (VF0228)] [Escherichia coli CFT073]
Kluyvera cryocrescens	NBRC 102467	GCA_001571285.1	9003	10583	-	entE	97.58	77.48	vfdb	NP_752612	(entE) 23-dihydroxybenzoate-AMP ligase component of enterobactin synthase multienzyme complex [Enterobactin (VF0228)] [Escherichia coli CFT073]
Kluyvera cryocrescens	NBRC 102467	GCA_001571285.1	17406	21214	-	entF	97.19	72.98	vfdb	NP_752604	(entF) enterobactin synthase multienzyme complex component ATP-dependent [Enterobactin (VF0228)] [Escherichia coli CFT073]
Kluyvera cryocrescens	NBRC 102467	GCA_001571285.1	13066	14277	-	entS	96.88	75.99	vfdb	NP_752609	(entS) enterobactin exporter iron-regulated [enterobactin (IA019)] [Escherichia coli CFT073]
Kluyvera cryocrescens	NBRC 102467	GCA_001571285.1	23039	25192	+	fepA	94.51	78.33	vfdb	NP_752600	(fepA) ferrienterobactin outer membrane transporter [Enterobactin (VF0228)] [Escherichia coli CFT073]
Kluyvera cryocrescens	NBRC 102467	GCA_001571285.1	12064	12945	+	fepB	92.06	78.37	vfdb	NP_752610	(fepB) ferrienterobactin ABC transporter periplasmic binding protein [Enterobactin (VF0228)] [Escherichia coli CFT073]
Kluyvera cryocrescens	NBRC 102467	GCA_001571285.1	16380	17167	+	fepC	96.45	79.09	vfdb	NP_752606	(fepC) ferrienterobactin ABC transporter ATPase [Enterobactin (VF0228)] [Escherichia coli CFT073]
Kluyvera cryocrescens	NBRC 102467	GCA_001571285.1	14474	15394	+	fepD	89.97	75.87	vfdb	NP_752608	(fepD) ferrienterobactin ABC transporter permease [Enterobactin (VF0228)] [Escherichia coli CFT073]
Kluyvera cryocrescens	NBRC 102467	GCA_001571285.1	15472	16383	+	fepG	91.84	76.64	vfdb	NP_752607	(fepG) iron-enterobactin ABC transporter permease [Enterobactin (VF0228)] [Escherichia coli CFT073]
Kluyvera cryocrescens	NBRC 102467	GCA_001571285.1	21500	22577	-	fes	87.78	71.24	vfdb	NP_752602	(fes) enterobactin/ferric enterobactin esterase [enterobactin (IA019)] [Escherichia coli CFT073]
Kluyvera cryocrescens	NBRC 102467	GCA_001571285.1	11409	11929	-	fimA	84.98	71.76	vfdb	NP_757241	(fimA) Type-1 fimbrial protein A chain precursor [Type 1 fimbriae (VF0221)] [Escherichia coli CFT073]
Kluyvera cryocrescens	NBRC 102467	GCA_001571285.1	10058	10659	-	fimC	82.92	73.92	vfdb	NP_757243	(fimC) Chaperone protein fimC precursor [Type 1 fimbriae (VF0221)] [Escherichia coli CFT073]
Kluyvera cryocrescens	NBRC 102467	GCA_001571285.1	7415	9828	-	fimD	91.47	75.54	vfdb	NP_757244	(fimD) Outer membrane usher protein fimD precursor [Type 1 fimbriae (VF0221)] [Escherichia coli CFT073]
Kluyvera cryocrescens	NBRC 102467	GCA_001571285.1	6786	7253	-	fimF	87.64	69.44	vfdb	NP_757245	(fimF) FimF protein precursor [Type 1 fimbriae (VF0221)] [Escherichia coli CFT073]
Kluyvera cryocrescens	NBRC 102467	GCA_001571285.1	6270	6707	-	fimG	86.9	75.57	vfdb	NP_757247	(fimG) FimG protein precursor [Type 1 fimbriae (VF0221)] [Escherichia coli CFT073]
Kluyvera cryocrescens	NBRC 102467	GCA_001571285.1	5352	6220	-	fimH	95.29	74.91	vfdb	NP_757248	(fimH) FimH protein precursor [Type 1 fimbriae (VF0221)] [Escherichia coli CFT073]
Kluyvera cryocrescens	NBRC 102467	GCA_001571285.1	10794	11299	-	fimI	93.7	69.56	vfdb	NP_757242	(fimI) Fimbrin-like protein fimI precursor [Type 1 fimbriae (VF0221)] [Escherichia coli CFT073]
Kluyvera cryocrescens	NBRC 102467	GCA_001571285.1	14596	16805	+	iutA	96.93	78.23	vfdb	NP_755498	(iutA) ferric aerobactin receptor precusor IutA [Aerobactin (VF0229)] [Escherichia coli CFT073]
Kluyvera cryocrescens	NBRC 102467	GCA_001571285.1	52063	53668	+	kpsD	95.65	71.69	vfdb	AAA21682	(kpsD) KpsD [K1 capsule (VF0239)] [Escherichia coli O18:K1:H7 str. RS218]
Kluyvera cryocrescens	NBRC 102467	GCA_001571285.1	63141	63794	-	kpsM	83.66	69.15	vfdb	AAA24046	(kpsM) KpsM [K1 capsule (VF0239)] [Escherichia coli O18:K1:H7 str. RS218]
Kluyvera cryocrescens	NBRC 102467	GCA_001571285.1	62483	63063	-	kpsT	86.97	69.22	vfdb	AAA24047	(kpsT) KpsT [K1 capsule (VF0239)] [Escherichia coli O18:K1:H7 str. RS218]
Kluyvera cryocrescens	NBRC 102467	GCA_001571285.1	74318	75373	-	ompA	100	84.47	vfdb	AAF37887	(ompA) outer membrane protein A [OmpA (VF0236)] [Escherichia coli O18:K1:H7 str. RS218]
Kluyvera cryocrescens	SCW13	GCA_009765145.1	48415	49760	-	aslA	94.19	79.64	vfdb	AAG10151	(aslA) putative arylsulfatase [AslA (VF0238)] [Escherichia coli O18:K1:H7 str. RS218]
Kluyvera cryocrescens	SCW13	GCA_009765145.1	300381	301318	-	chuS	90.77	74.52	vfdb	NP_756169	(chuS) heme oxygenase ChuS [Chu (VF0227)] [Escherichia coli CFT073]
Kluyvera cryocrescens	SCW13	GCA_009765145.1	387211	388193	-	chuU	98.49	74.19	vfdb	NP_756179	(chuU) heme permease protein ChuU [Chu (VF0227)] [Escherichia coli CFT073]
Kluyvera cryocrescens	SCW13	GCA_009765145.1	386585	387233	-	chuV	80.9	74.46	vfdb	NP_756180	(chuV) ATP-binding hydrophilic protein ChuV [Chu (VF0227)] [Escherichia coli CFT073]
Kluyvera cryocrescens	SCW13	GCA_009765145.1	389377	390696	-	chuW	98.58	76.91	vfdb	NP_756176	(chuW) Putative oxygen independent coproporphyrinogen III oxidase [Chu (VF0227)] [Escherichia coli CFT073]
Kluyvera cryocrescens	SCW13	GCA_009765145.1	388927	389364	-	chuX	88.48	79.22	vfdb	NP_756177	(chuX) putative heme-binding protein ChuX [Chu (VF0227)] [Escherichia coli CFT073]
Kluyvera cryocrescens	SCW13	GCA_009765145.1	388247	388870	-	chuY	99.04	72.54	vfdb	NP_756178	(chuY) ChuY [Chu (VF0227)] [Escherichia coli CFT073]
Kluyvera cryocrescens	SCW13	GCA_009765145.1	160217	160928	-	csgG	85.37	76.69	vfdb	NP_460110	(csgG) curli production assembly/transport protein CsgG [Agf (VF0103)] [Salmonella enterica subsp. enterica serovar Typhimurium str. LT2]
Kluyvera cryocrescens	SCW13	GCA_009765145.1	351733	352474	+	entA	99.33	78.03	vfdb	NP_752614	(entA) 23-dihydro-23-dihydroxybenzoate dehydrogenase [Enterobactin (VF0228)] [Escherichia coli CFT073]
Kluyvera cryocrescens	SCW13	GCA_009765145.1	350869	351723	+	entB	99.65	78.9	vfdb	NP_752613	(entB) isochorismatase [Enterobactin (VF0228)] [Escherichia coli CFT073]
Kluyvera cryocrescens	SCW13	GCA_009765145.1	348037	349228	+	entC	99.33	74.04	vfdb	NP_752611	(entC) isochorismate synthase 1 [Enterobactin (VF0228)] [Escherichia coli CFT073]
Kluyvera cryocrescens	SCW13	GCA_009765145.1	349256	350836	+	entE	97.58	77.55	vfdb	NP_752612	(entE) 23-dihydroxybenzoate-AMP ligase component of enterobactin synthase multienzyme complex [Enterobactin (VF0228)] [Escherichia coli CFT073]
Kluyvera cryocrescens	SCW13	GCA_009765145.1	338552	342360	+	entF	97.19	73.06	vfdb	NP_752604	(entF) enterobactin synthase multienzyme complex component ATP-dependent [Enterobactin (VF0228)] [Escherichia coli CFT073]
Kluyvera cryocrescens	SCW13	GCA_009765145.1	345562	346773	+	entS	96.88	76.57	vfdb	NP_752609	(entS) enterobactin exporter iron-regulated [enterobactin (IA019)] [Escherichia coli CFT073]
Kluyvera cryocrescens	SCW13	GCA_009765145.1	334565	336727	-	fepA	94.6	77.99	vfdb	NP_752600	(fepA) ferrienterobactin outer membrane transporter [Enterobactin (VF0228)] [Escherichia coli CFT073]
Kluyvera cryocrescens	SCW13	GCA_009765145.1	346894	347775	-	fepB	92.06	78.71	vfdb	NP_752610	(fepB) ferrienterobactin ABC transporter periplasmic binding protein [Enterobactin (VF0228)] [Escherichia coli CFT073]
Kluyvera cryocrescens	SCW13	GCA_009765145.1	342672	343459	-	fepC	96.45	79.47	vfdb	NP_752606	(fepC) ferrienterobactin ABC transporter ATPase [Enterobactin (VF0228)] [Escherichia coli CFT073]
Kluyvera cryocrescens	SCW13	GCA_009765145.1	344445	345365	-	fepD	89.97	76.52	vfdb	NP_752608	(fepD) ferrienterobactin ABC transporter permease [Enterobactin (VF0228)] [Escherichia coli CFT073]
Kluyvera cryocrescens	SCW13	GCA_009765145.1	343456	344367	-	fepG	91.34	76.55	vfdb	NP_752607	(fepG) iron-enterobactin ABC transporter permease [Enterobactin (VF0228)] [Escherichia coli CFT073]
Kluyvera cryocrescens	SCW13	GCA_009765145.1	337189	338266	+	fes	87.78	71.52	vfdb	NP_752602	(fes) enterobactin/ferric enterobactin esterase [enterobactin (IA019)] [Escherichia coli CFT073]
Kluyvera cryocrescens	SCW13	GCA_009765145.1	6365	6885	-	fimA	84.82	72	vfdb	NP_757241	(fimA) Type-1 fimbrial protein A chain precursor [Type 1 fimbriae (VF0221)] [Escherichia coli CFT073]
Kluyvera cryocrescens	SCW13	GCA_009765145.1	5014	5615	-	fimC	82.92	74.25	vfdb	NP_757243	(fimC) Chaperone protein fimC precursor [Type 1 fimbriae (VF0221)] [Escherichia coli CFT073]
Kluyvera cryocrescens	SCW13	GCA_009765145.1	2371	4784	-	fimD	91.47	75.54	vfdb	NP_757244	(fimD) Outer membrane usher protein fimD precursor [Type 1 fimbriae (VF0221)] [Escherichia coli CFT073]
Kluyvera cryocrescens	SCW13	GCA_009765145.1	1742	2209	-	fimF	87.64	69.02	vfdb	NP_757245	(fimF) FimF protein precursor [Type 1 fimbriae (VF0221)] [Escherichia coli CFT073]
Kluyvera cryocrescens	SCW13	GCA_009765145.1	1226	1663	-	fimG	86.9	75.8	vfdb	NP_757247	(fimG) FimG protein precursor [Type 1 fimbriae (VF0221)] [Escherichia coli CFT073]
Kluyvera cryocrescens	SCW13	GCA_009765145.1	308	1176	-	fimH	95.29	74.57	vfdb	NP_757248	(fimH) FimH protein precursor [Type 1 fimbriae (VF0221)] [Escherichia coli CFT073]
Kluyvera cryocrescens	SCW13	GCA_009765145.1	5750	6255	-	fimI	93.7	69.56	vfdb	NP_757242	(fimI) Fimbrin-like protein fimI precursor [Type 1 fimbriae (VF0221)] [Escherichia coli CFT073]
Kluyvera cryocrescens	SCW13	GCA_009765145.1	64348	66557	-	iutA	96.93	78.19	vfdb	NP_755498	(iutA) ferric aerobactin receptor precusor IutA [Aerobactin (VF0229)] [Escherichia coli CFT073]
Kluyvera cryocrescens	SCW13	GCA_009765145.1	84378	85983	-	kpsD	95.53	71.79	vfdb	AAA21682	(kpsD) KpsD [K1 capsule (VF0239)] [Escherichia coli O18:K1:H7 str. RS218]
Kluyvera cryocrescens	SCW13	GCA_009765145.1	71356	72011	+	kpsM	83.66	66.77	vfdb	AAA24046	(kpsM) KpsM [K1 capsule (VF0239)] [Escherichia coli O18:K1:H7 str. RS218]
Kluyvera cryocrescens	SCW13	GCA_009765145.1	72104	72661	+	kpsT	83.33	69.61	vfdb	AAA24047	(kpsT) KpsT [K1 capsule (VF0239)] [Escherichia coli O18:K1:H7 str. RS218]
Kluyvera cryocrescens	SCW13	GCA_009765145.1	507493	508548	+	ompA	100	84.56	vfdb	AAF37887	(ompA) outer membrane protein A [OmpA (VF0236)] [Escherichia coli O18:K1:H7 str. RS218]
Kluyvera cryocrescens	NCTC 10483	GCA_900452275.1	50120	51465	-	aslA	94.19	79.57	vfdb	AAG10151	(aslA) putative arylsulfatase [AslA (VF0238)] [Escherichia coli O18:K1:H7 str. RS218]
Kluyvera cryocrescens	NCTC 10483	GCA_900452275.1	18603	19540	-	chuS	90.77	74.52	vfdb	NP_756169	(chuS) heme oxygenase ChuS [Chu (VF0227)] [Escherichia coli CFT073]
Kluyvera cryocrescens	NCTC 10483	GCA_900452275.1	105442	106424	-	chuU	98.49	74.19	vfdb	NP_756179	(chuU) heme permease protein ChuU [Chu (VF0227)] [Escherichia coli CFT073]
Kluyvera cryocrescens	NCTC 10483	GCA_900452275.1	104816	105464	-	chuV	80.9	74.31	vfdb	NP_756180	(chuV) ATP-binding hydrophilic protein ChuV [Chu (VF0227)] [Escherichia coli CFT073]
Kluyvera cryocrescens	NCTC 10483	GCA_900452275.1	107608	108927	-	chuW	98.58	76.84	vfdb	NP_756176	(chuW) Putative oxygen independent coproporphyrinogen III oxidase [Chu (VF0227)] [Escherichia coli CFT073]
Kluyvera cryocrescens	NCTC 10483	GCA_900452275.1	107158	107595	-	chuX	88.48	79.22	vfdb	NP_756177	(chuX) putative heme-binding protein ChuX [Chu (VF0227)] [Escherichia coli CFT073]
Kluyvera cryocrescens	NCTC 10483	GCA_900452275.1	106478	107101	-	chuY	99.04	72.86	vfdb	NP_756178	(chuY) ChuY [Chu (VF0227)] [Escherichia coli CFT073]
Kluyvera cryocrescens	NCTC 10483	GCA_900452275.1	136031	136742	+	csgG	85.37	76.83	vfdb	NP_460110	(csgG) curli production assembly/transport protein CsgG [Agf (VF0103)] [Salmonella enterica subsp. enterica serovar Typhimurium str. LT2]
Kluyvera cryocrescens	NCTC 10483	GCA_900452275.1	77590	78331	-	entA	99.33	78.57	vfdb	NP_752614	(entA) 23-dihydro-23-dihydroxybenzoate dehydrogenase [Enterobactin (VF0228)] [Escherichia coli CFT073]
Kluyvera cryocrescens	NCTC 10483	GCA_900452275.1	78341	79195	-	entB	99.65	79.02	vfdb	NP_752613	(entB) isochorismatase [Enterobactin (VF0228)] [Escherichia coli CFT073]
Kluyvera cryocrescens	NCTC 10483	GCA_900452275.1	80836	82027	-	entC	99.33	74.04	vfdb	NP_752611	(entC) isochorismate synthase 1 [Enterobactin (VF0228)] [Escherichia coli CFT073]
Kluyvera cryocrescens	NCTC 10483	GCA_900452275.1	79228	80808	-	entE	97.58	77.55	vfdb	NP_752612	(entE) 23-dihydroxybenzoate-AMP ligase component of enterobactin synthase multienzyme complex [Enterobactin (VF0228)] [Escherichia coli CFT073]
Kluyvera cryocrescens	NCTC 10483	GCA_900452275.1	87631	91439	-	entF	97.14	73.1	vfdb	NP_752604	(entF) enterobactin synthase multienzyme complex component ATP-dependent [Enterobactin (VF0228)] [Escherichia coli CFT073]
Kluyvera cryocrescens	NCTC 10483	GCA_900452275.1	83291	84502	-	entS	96.88	76.07	vfdb	NP_752609	(entS) enterobactin exporter iron-regulated [enterobactin (IA019)] [Escherichia coli CFT073]
Kluyvera cryocrescens	NCTC 10483	GCA_900452275.1	93264	95426	+	fepA	94.6	77.94	vfdb	NP_752600	(fepA) ferrienterobactin outer membrane transporter [Enterobactin (VF0228)] [Escherichia coli CFT073]
Kluyvera cryocrescens	NCTC 10483	GCA_900452275.1	82289	83170	+	fepB	92.06	78.37	vfdb	NP_752610	(fepB) ferrienterobactin ABC transporter periplasmic binding protein [Enterobactin (VF0228)] [Escherichia coli CFT073]
Kluyvera cryocrescens	NCTC 10483	GCA_900452275.1	86605	87392	+	fepC	96.45	78.83	vfdb	NP_752606	(fepC) ferrienterobactin ABC transporter ATPase [Enterobactin (VF0228)] [Escherichia coli CFT073]
Kluyvera cryocrescens	NCTC 10483	GCA_900452275.1	84699	85619	+	fepD	89.97	76.19	vfdb	NP_752608	(fepD) ferrienterobactin ABC transporter permease [Enterobactin (VF0228)] [Escherichia coli CFT073]
Kluyvera cryocrescens	NCTC 10483	GCA_900452275.1	85697	86608	+	fepG	91.54	76.61	vfdb	NP_752607	(fepG) iron-enterobactin ABC transporter permease [Enterobactin (VF0228)] [Escherichia coli CFT073]
Kluyvera cryocrescens	NCTC 10483	GCA_900452275.1	91725	92802	-	fes	87.78	71.52	vfdb	NP_752602	(fes) enterobactin/ferric enterobactin esterase [enterobactin (IA019)] [Escherichia coli CFT073]
Kluyvera cryocrescens	NCTC 10483	GCA_900452275.1	781	1301	+	fimA	84.82	71.62	vfdb	NP_757241	(fimA) Type-1 fimbrial protein A chain precursor [Type 1 fimbriae (VF0221)] [Escherichia coli CFT073]
Kluyvera cryocrescens	NCTC 10483	GCA_900452275.1	2051	2652	+	fimC	82.92	74.09	vfdb	NP_757243	(fimC) Chaperone protein fimC precursor [Type 1 fimbriae (VF0221)] [Escherichia coli CFT073]
Kluyvera cryocrescens	NCTC 10483	GCA_900452275.1	2882	5295	+	fimD	91.47	75.41	vfdb	NP_757244	(fimD) Outer membrane usher protein fimD precursor [Type 1 fimbriae (VF0221)] [Escherichia coli CFT073]
Kluyvera cryocrescens	NCTC 10483	GCA_900452275.1	5457	5924	+	fimF	87.64	69.02	vfdb	NP_757245	(fimF) FimF protein precursor [Type 1 fimbriae (VF0221)] [Escherichia coli CFT073]
Kluyvera cryocrescens	NCTC 10483	GCA_900452275.1	6003	6440	+	fimG	86.9	75.8	vfdb	NP_757247	(fimG) FimG protein precursor [Type 1 fimbriae (VF0221)] [Escherichia coli CFT073]
Kluyvera cryocrescens	NCTC 10483	GCA_900452275.1	6490	7358	+	fimH	95.29	74.8	vfdb	NP_757248	(fimH) FimH protein precursor [Type 1 fimbriae (VF0221)] [Escherichia coli CFT073]
Kluyvera cryocrescens	NCTC 10483	GCA_900452275.1	1411	1916	+	fimI	93.7	69.56	vfdb	NP_757242	(fimI) Fimbrin-like protein fimI precursor [Type 1 fimbriae (VF0221)] [Escherichia coli CFT073]
Kluyvera cryocrescens	NCTC 10483	GCA_900452275.1	37131	39339	+	iutA	96.89	78.22	vfdb	NP_755498	(iutA) ferric aerobactin receptor precusor IutA [Aerobactin (VF0229)] [Escherichia coli CFT073]
Kluyvera cryocrescens	NCTC 10483	GCA_900452275.1	1309	2914	-	kpsD	95.53	71.73	vfdb	AAA21682	(kpsD) KpsD [K1 capsule (VF0239)] [Escherichia coli O18:K1:H7 str. RS218]
Kluyvera cryocrescens	NCTC 10483	GCA_900452275.1	7822	8877	+	ompA	100	84.56	vfdb	AAF37887	(ompA) outer membrane protein A [OmpA (VF0236)] [Escherichia coli O18:K1:H7 str. RS218]
Kluyvera cryocrescens	NCTC 12993	GCA_900706835.1	299661	300960	-	aslA	90.97	80.55	vfdb	AAG10151	(aslA) putative arylsulfatase [AslA (VF0238)] [Escherichia coli O18:K1:H7 str. RS218]
Kluyvera cryocrescens	NCTC 12993	GCA_900706835.1	280166	281103	-	chuS	90.77	74.52	vfdb	NP_756169	(chuS) heme oxygenase ChuS [Chu (VF0227)] [Escherichia coli CFT073]
Kluyvera cryocrescens	NCTC 12993	GCA_900706835.1	368261	369244	-	chuU	98.49	74.42	vfdb	NP_756179	(chuU) heme permease protein ChuU [Chu (VF0227)] [Escherichia coli CFT073]
Kluyvera cryocrescens	NCTC 12993	GCA_900706835.1	367634	368283	-	chuV	80.9	74.04	vfdb	NP_756180	(chuV) ATP-binding hydrophilic protein ChuV [Chu (VF0227)] [Escherichia coli CFT073]
Kluyvera cryocrescens	NCTC 12993	GCA_900706835.1	370429	371749	-	chuW	98.58	76.85	vfdb	NP_756176	(chuW) Putative oxygen independent coproporphyrinogen III oxidase [Chu (VF0227)] [Escherichia coli CFT073]
Kluyvera cryocrescens	NCTC 12993	GCA_900706835.1	369979	370416	-	chuX	88.48	78.77	vfdb	NP_756177	(chuX) putative heme-binding protein ChuX [Chu (VF0227)] [Escherichia coli CFT073]
Kluyvera cryocrescens	NCTC 12993	GCA_900706835.1	369299	369922	-	chuY	99.04	72.7	vfdb	NP_756178	(chuY) ChuY [Chu (VF0227)] [Escherichia coli CFT073]
Kluyvera cryocrescens	NCTC 12993	GCA_900706835.1	28740	29462	-	csgG	86.45	76.31	vfdb	NP_460110	(csgG) curli production assembly/transport protein CsgG [Agf (VF0103)] [Salmonella enterica subsp. enterica serovar Typhimurium str. LT2]
Kluyvera cryocrescens	NCTC 12993	GCA_900706835.1	65952	66693	+	entA	99.33	78.44	vfdb	NP_752614	(entA) 23-dihydro-23-dihydroxybenzoate dehydrogenase [Enterobactin (VF0228)] [Escherichia coli CFT073]
Kluyvera cryocrescens	NCTC 12993	GCA_900706835.1	65086	65942	+	entB	99.53	78.86	vfdb	NP_752613	(entB) isochorismatase [Enterobactin (VF0228)] [Escherichia coli CFT073]
Kluyvera cryocrescens	NCTC 12993	GCA_900706835.1	62238	63440	+	entC	98.91	73.64	vfdb	NP_752611	(entC) isochorismate synthase 1 [Enterobactin (VF0228)] [Escherichia coli CFT073]
Kluyvera cryocrescens	NCTC 12993	GCA_900706835.1	63468	65053	+	entE	97.7	77.21	vfdb	NP_752612	(entE) 23-dihydroxybenzoate-AMP ligase component of enterobactin synthase multienzyme complex [Enterobactin (VF0228)] [Escherichia coli CFT073]
Kluyvera cryocrescens	NCTC 12993	GCA_900706835.1	52818	56623	+	entF	97.04	72.79	vfdb	NP_752604	(entF) enterobactin synthase multienzyme complex component ATP-dependent [Enterobactin (VF0228)] [Escherichia coli CFT073]
Kluyvera cryocrescens	NCTC 12993	GCA_900706835.1	59762	60971	+	entS	96.64	75.84	vfdb	NP_752609	(entS) enterobactin exporter iron-regulated [enterobactin (IA019)] [Escherichia coli CFT073]
Kluyvera cryocrescens	NCTC 12993	GCA_900706835.1	48827	50988	-	fepA	94.56	78.12	vfdb	NP_752600	(fepA) ferrienterobactin outer membrane transporter [Enterobactin (VF0228)] [Escherichia coli CFT073]
Kluyvera cryocrescens	NCTC 12993	GCA_900706835.1	61093	61975	-	fepB	92.06	78.28	vfdb	NP_752610	(fepB) ferrienterobactin ABC transporter periplasmic binding protein [Enterobactin (VF0228)] [Escherichia coli CFT073]
Kluyvera cryocrescens	NCTC 12993	GCA_900706835.1	56860	57649	-	fepC	95.96	78.49	vfdb	NP_752606	(fepC) ferrienterobactin ABC transporter ATPase [Enterobactin (VF0228)] [Escherichia coli CFT073]
Kluyvera cryocrescens	NCTC 12993	GCA_900706835.1	58646	59565	-	fepD	89.68	75.59	vfdb	NP_752608	(fepD) ferrienterobactin ABC transporter permease [Enterobactin (VF0228)] [Escherichia coli CFT073]
Kluyvera cryocrescens	NCTC 12993	GCA_900706835.1	57646	58568	-	fepG	91.74	75.65	vfdb	NP_752607	(fepG) iron-enterobactin ABC transporter permease [Enterobactin (VF0228)] [Escherichia coli CFT073]
Kluyvera cryocrescens	NCTC 12993	GCA_900706835.1	51455	52532	+	fes	87.7	71.24	vfdb	NP_752602	(fes) enterobactin/ferric enterobactin esterase [enterobactin (IA019)] [Escherichia coli CFT073]
Kluyvera cryocrescens	NCTC 12993	GCA_900706835.1	2609	3132	-	fimA	84.98	71.54	vfdb	NP_757241	(fimA) Type-1 fimbrial protein A chain precursor [Type 1 fimbriae (VF0221)] [Escherichia coli CFT073]
Kluyvera cryocrescens	NCTC 12993	GCA_900706835.1	1245	1851	-	fimC	82.92	73.48	vfdb	NP_757243	(fimC) Chaperone protein fimC precursor [Type 1 fimbriae (VF0221)] [Escherichia coli CFT073]
Kluyvera cryocrescens	NCTC 12993	GCA_900706835.1	980	1447	-	fimF	87.64	69.44	vfdb	NP_757245	(fimF) FimF protein precursor [Type 1 fimbriae (VF0221)] [Escherichia coli CFT073]
Kluyvera cryocrescens	NCTC 12993	GCA_900706835.1	463	901	-	fimG	86.9	75.4	vfdb	NP_757247	(fimG) FimG protein precursor [Type 1 fimbriae (VF0221)] [Escherichia coli CFT073]
Kluyvera cryocrescens	NCTC 12993	GCA_900706835.1	1986	2499	-	fimI	93.7	69.07	vfdb	NP_757242	(fimI) Fimbrin-like protein fimI precursor [Type 1 fimbriae (VF0221)] [Escherichia coli CFT073]
Kluyvera cryocrescens	NCTC 12993	GCA_900706835.1	14485	16700	-	iutA	96.93	77.98	vfdb	NP_755498	(iutA) ferric aerobactin receptor precusor IutA [Aerobactin (VF0229)] [Escherichia coli CFT073]
Kluyvera cryocrescens	NCTC 12993	GCA_900706835.1	206067	207673	-	kpsD	95.65	71.71	vfdb	AAA21682	(kpsD) KpsD [K1 capsule (VF0239)] [Escherichia coli O18:K1:H7 str. RS218]
Kluyvera cryocrescens	NCTC 12993	GCA_900706835.1	195921	196575	+	kpsM	83.66	69.04	vfdb	AAA24046	(kpsM) KpsM [K1 capsule (VF0239)] [Escherichia coli O18:K1:H7 str. RS218]
Kluyvera cryocrescens	NCTC 12993	GCA_900706835.1	196653	197233	+	kpsT	86.97	69.22	vfdb	AAA24047	(kpsT) KpsT [K1 capsule (VF0239)] [Escherichia coli O18:K1:H7 str. RS218]
Kluyvera cryocrescens	NCTC 12993	GCA_900706835.1	43540	44595	-	ompA	100	84.47	vfdb	AAF37887	(ompA) outer membrane protein A [OmpA (VF0236)] [Escherichia coli O18:K1:H7 str. RS218]
Kluyvera georgiana	missing	DRR015591	51404	52824	-	aslA	99.44	80.16	vfdb	AAG10151	(aslA) putative arylsulfatase [AslA (VF0238)] [Escherichia coli O18:K1:H7 str. RS218]
Kluyvera georgiana	missing	DRR015591	75672	76585	-	chuS	87.76	65.95	vfdb	NP_756169	(chuS) heme oxygenase ChuS [Chu (VF0227)] [Escherichia coli CFT073]
Kluyvera georgiana	missing	DRR015591	47201	47925	-	entA	96.92	78.65	vfdb	NP_752614	(entA) 23-dihydro-23-dihydroxybenzoate dehydrogenase [Enterobactin (VF0228)] [Escherichia coli CFT073]
Kluyvera georgiana	missing	DRR015591	47955	48809	-	entB	99.53	78.81	vfdb	NP_752613	(entB) isochorismatase [Enterobactin (VF0228)] [Escherichia coli CFT073]
Kluyvera georgiana	missing	DRR015591	50443	51635	-	entC	98.74	74.32	vfdb	NP_752611	(entC) isochorismate synthase 1 [Enterobactin (VF0228)] [Escherichia coli CFT073]
Kluyvera georgiana	missing	DRR015591	48842	50422	-	entE	97.58	77.42	vfdb	NP_752612	(entE) 23-dihydroxybenzoate-AMP ligase component of enterobactin synthase multienzyme complex [Enterobactin (VF0228)] [Escherichia coli CFT073]
Kluyvera georgiana	missing	DRR015591	57241	61049	-	entF	97.35	71.56	vfdb	NP_752604	(entF) enterobactin synthase multienzyme complex component ATP-dependent [Enterobactin (VF0228)] [Escherichia coli CFT073]
Kluyvera georgiana	missing	DRR015591	52940	54155	-	entS	97.2	78.54	vfdb	NP_752609	(entS) enterobactin exporter iron-regulated [enterobactin (IA019)] [Escherichia coli CFT073]
Kluyvera georgiana	missing	DRR015591	62792	64939	+	fepA	94.07	76.99	vfdb	NP_752600	(fepA) ferrienterobactin outer membrane transporter [Enterobactin (VF0228)] [Escherichia coli CFT073]
Kluyvera georgiana	missing	DRR015591	51909	52776	+	fepB	90.7	79.26	vfdb	NP_752610	(fepB) ferrienterobactin ABC transporter periplasmic binding protein [Enterobactin (VF0228)] [Escherichia coli CFT073]
Kluyvera georgiana	missing	DRR015591	56260	57047	+	fepC	96.45	77.57	vfdb	NP_752606	(fepC) ferrienterobactin ABC transporter ATPase [Enterobactin (VF0228)] [Escherichia coli CFT073]
Kluyvera georgiana	missing	DRR015591	54291	55253	+	fepD	94.49	78.55	vfdb	NP_752608	(fepD) ferrienterobactin ABC transporter permease [Enterobactin (VF0228)] [Escherichia coli CFT073]
Kluyvera georgiana	missing	DRR015591	55350	56263	+	fepG	91.84	78.06	vfdb	NP_752607	(fepG) iron-enterobactin ABC transporter permease [Enterobactin (VF0228)] [Escherichia coli CFT073]
Kluyvera georgiana	missing	DRR015591	61321	62402	-	fes	87.86	71.7	vfdb	NP_752602	(fes) enterobactin/ferric enterobactin esterase [enterobactin (IA019)] [Escherichia coli CFT073]
Kluyvera georgiana	missing	DRR015591	17159	17667	-	fimA	83.66	70.06	vfdb	NP_757241	(fimA) Type-1 fimbrial protein A chain precursor [Type 1 fimbriae (VF0221)] [Escherichia coli CFT073]
Kluyvera georgiana	missing	DRR015591	15821	16416	-	fimC	82.09	74.66	vfdb	NP_757243	(fimC) Chaperone protein fimC precursor [Type 1 fimbriae (VF0221)] [Escherichia coli CFT073]
Kluyvera georgiana	missing	DRR015591	13164	15626	-	fimD	93.21	74.61	vfdb	NP_757244	(fimD) Outer membrane usher protein fimD precursor [Type 1 fimbriae (VF0221)] [Escherichia coli CFT073]
Kluyvera georgiana	missing	DRR015591	12593	13062	-	fimF	86.89	71.64	vfdb	NP_757245	(fimF) FimF protein precursor [Type 1 fimbriae (VF0221)] [Escherichia coli CFT073]
Kluyvera georgiana	missing	DRR015591	12077	12515	-	fimG	87.1	71.53	vfdb	NP_757247	(fimG) FimG protein precursor [Type 1 fimbriae (VF0221)] [Escherichia coli CFT073]
Kluyvera georgiana	missing	DRR015591	11159	12063	-	fimH	98.79	74.94	vfdb	NP_757248	(fimH) FimH protein precursor [Type 1 fimbriae (VF0221)] [Escherichia coli CFT073]
Kluyvera georgiana	missing	DRR015591	16545	17050	-	fimI	93.52	68.64	vfdb	NP_757242	(fimI) Fimbrin-like protein fimI precursor [Type 1 fimbriae (VF0221)] [Escherichia coli CFT073]
Kluyvera georgiana	missing	DRR015591	252007	254216	+	iutA	96.75	78.28	vfdb	NP_755498	(iutA) ferric aerobactin receptor precusor IutA [Aerobactin (VF0229)] [Escherichia coli CFT073]
Kluyvera georgiana	missing	DRR015591	97034	98515	-	kpsD	87.95	72.26	vfdb	AAA21682	(kpsD) KpsD [K1 capsule (VF0239)] [Escherichia coli O18:K1:H7 str. RS218]
Kluyvera georgiana	missing	DRR015591	86569	87345	+	kpsM	99.74	70.47	vfdb	AAA24046	(kpsM) KpsM [K1 capsule (VF0239)] [Escherichia coli O18:K1:H7 str. RS218]
Kluyvera georgiana	missing	DRR015591	66808	67863	+	ompA	100	84.75	vfdb	AAF37887	(ompA) outer membrane protein A [OmpA (VF0236)] [Escherichia coli O18:K1:H7 str. RS218]
Kluyvera georgiana	ATCC 51603	GCA_001654985.1	51341	52761	-	aslA	99.44	80.16	vfdb	AAG10151	(aslA) putative arylsulfatase [AslA (VF0238)] [Escherichia coli O18:K1:H7 str. RS218]
Kluyvera georgiana	ATCC 51603	GCA_001654985.1	99011	99924	-	chuS	87.76	65.95	vfdb	NP_756169	(chuS) heme oxygenase ChuS [Chu (VF0227)] [Escherichia coli CFT073]
Kluyvera georgiana	ATCC 51603	GCA_001654985.1	6512	7236	+	entA	96.92	78.65	vfdb	NP_752614	(entA) 23-dihydro-23-dihydroxybenzoate dehydrogenase [Enterobactin (VF0228)] [Escherichia coli CFT073]
Kluyvera georgiana	ATCC 51603	GCA_001654985.1	5628	6482	+	entB	99.53	78.81	vfdb	NP_752613	(entB) isochorismatase [Enterobactin (VF0228)] [Escherichia coli CFT073]
Kluyvera georgiana	ATCC 51603	GCA_001654985.1	2802	3994	+	entC	98.74	74.32	vfdb	NP_752611	(entC) isochorismate synthase 1 [Enterobactin (VF0228)] [Escherichia coli CFT073]
Kluyvera georgiana	ATCC 51603	GCA_001654985.1	4015	5595	+	entE	97.58	77.42	vfdb	NP_752612	(entE) 23-dihydroxybenzoate-AMP ligase component of enterobactin synthase multienzyme complex [Enterobactin (VF0228)] [Escherichia coli CFT073]
Kluyvera georgiana	ATCC 51603	GCA_001654985.1	27905	31713	+	entF	97.35	71.56	vfdb	NP_752604	(entF) enterobactin synthase multienzyme complex component ATP-dependent [Enterobactin (VF0228)] [Escherichia coli CFT073]
Kluyvera georgiana	ATCC 51603	GCA_001654985.1	282	1497	+	entS	97.2	78.54	vfdb	NP_752609	(entS) enterobactin exporter iron-regulated [enterobactin (IA019)] [Escherichia coli CFT073]
Kluyvera georgiana	ATCC 51603	GCA_001654985.1	24015	26162	-	fepA	94.07	76.99	vfdb	NP_752600	(fepA) ferrienterobactin outer membrane transporter [Enterobactin (VF0228)] [Escherichia coli CFT073]
Kluyvera georgiana	ATCC 51603	GCA_001654985.1	1661	2528	-	fepB	90.7	79.26	vfdb	NP_752610	(fepB) ferrienterobactin ABC transporter periplasmic binding protein [Enterobactin (VF0228)] [Escherichia coli CFT073]
Kluyvera georgiana	ATCC 51603	GCA_001654985.1	31907	32694	-	fepC	96.45	77.57	vfdb	NP_752606	(fepC) ferrienterobactin ABC transporter ATPase [Enterobactin (VF0228)] [Escherichia coli CFT073]
Kluyvera georgiana	ATCC 51603	GCA_001654985.1	32691	33604	-	fepG	91.84	78.06	vfdb	NP_752607	(fepG) iron-enterobactin ABC transporter permease [Enterobactin (VF0228)] [Escherichia coli CFT073]
Kluyvera georgiana	ATCC 51603	GCA_001654985.1	26552	27633	+	fes	87.86	71.7	vfdb	NP_752602	(fes) enterobactin/ferric enterobactin esterase [enterobactin (IA019)] [Escherichia coli CFT073]
Kluyvera georgiana	ATCC 51603	GCA_001654985.1	227980	228488	+	fimA	83.66	70.06	vfdb	NP_757241	(fimA) Type-1 fimbrial protein A chain precursor [Type 1 fimbriae (VF0221)] [Escherichia coli CFT073]
Kluyvera georgiana	ATCC 51603	GCA_001654985.1	229231	229826	+	fimC	82.09	74.66	vfdb	NP_757243	(fimC) Chaperone protein fimC precursor [Type 1 fimbriae (VF0221)] [Escherichia coli CFT073]
Kluyvera georgiana	ATCC 51603	GCA_001654985.1	230021	232483	+	fimD	93.21	74.61	vfdb	NP_757244	(fimD) Outer membrane usher protein fimD precursor [Type 1 fimbriae (VF0221)] [Escherichia coli CFT073]
Kluyvera georgiana	ATCC 51603	GCA_001654985.1	232585	233054	+	fimF	86.89	71.64	vfdb	NP_757245	(fimF) FimF protein precursor [Type 1 fimbriae (VF0221)] [Escherichia coli CFT073]
Kluyvera georgiana	ATCC 51603	GCA_001654985.1	233132	233570	+	fimG	87.1	71.53	vfdb	NP_757247	(fimG) FimG protein precursor [Type 1 fimbriae (VF0221)] [Escherichia coli CFT073]
Kluyvera georgiana	ATCC 51603	GCA_001654985.1	233584	234488	+	fimH	98.79	74.94	vfdb	NP_757248	(fimH) FimH protein precursor [Type 1 fimbriae (VF0221)] [Escherichia coli CFT073]
Kluyvera georgiana	ATCC 51603	GCA_001654985.1	228597	229102	+	fimI	93.52	68.64	vfdb	NP_757242	(fimI) Fimbrin-like protein fimI precursor [Type 1 fimbriae (VF0221)] [Escherichia coli CFT073]
Kluyvera georgiana	ATCC 51603	GCA_001654985.1	5509	7718	-	iutA	96.75	78.28	vfdb	NP_755498	(iutA) ferric aerobactin receptor precusor IutA [Aerobactin (VF0229)] [Escherichia coli CFT073]
Kluyvera georgiana	ATCC 51603	GCA_001654985.1	6328	7809	-	kpsD	87.95	72.26	vfdb	AAA21682	(kpsD) KpsD [K1 capsule (VF0239)] [Escherichia coli O18:K1:H7 str. RS218]
Kluyvera georgiana	ATCC 51603	GCA_001654985.1	86751	87527	+	kpsM	99.74	70.47	vfdb	AAA24046	(kpsM) KpsM [K1 capsule (VF0239)] [Escherichia coli O18:K1:H7 str. RS218]
Kluyvera georgiana	ATCC 51603	GCA_001654985.1	75033	76088	-	ompA	100	84.75	vfdb	AAF37887	(ompA) outer membrane protein A [OmpA (VF0236)] [Escherichia coli O18:K1:H7 str. RS218]
Kluyvera georgiana	WCH1410	GCA_001682915.1	49380	50800	+	aslA	99.44	79.59	vfdb	AAG10151	(aslA) putative arylsulfatase [AslA (VF0238)] [Escherichia coli O18:K1:H7 str. RS218]
Kluyvera georgiana	WCH1410	GCA_001682915.1	5237	6150	+	chuS	87.76	66.49	vfdb	NP_756169	(chuS) heme oxygenase ChuS [Chu (VF0227)] [Escherichia coli CFT073]
Kluyvera georgiana	WCH1410	GCA_001682915.1	7149	7957	+	chuU	80.16	65.21	vfdb	NP_756179	(chuU) heme permease protein ChuU [Chu (VF0227)] [Escherichia coli CFT073]
Kluyvera georgiana	WCH1410	GCA_001682915.1	37171	37895	+	entA	96.92	78.93	vfdb	NP_752614	(entA) 23-dihydro-23-dihydroxybenzoate dehydrogenase [Enterobactin (VF0228)] [Escherichia coli CFT073]
Kluyvera georgiana	WCH1410	GCA_001682915.1	36287	37141	+	entB	99.53	79.63	vfdb	NP_752613	(entB) isochorismatase [Enterobactin (VF0228)] [Escherichia coli CFT073]
Kluyvera georgiana	WCH1410	GCA_001682915.1	33461	34653	+	entC	98.74	74.4	vfdb	NP_752611	(entC) isochorismate synthase 1 [Enterobactin (VF0228)] [Escherichia coli CFT073]
Kluyvera georgiana	WCH1410	GCA_001682915.1	34674	36254	+	entE	97.58	77.3	vfdb	NP_752612	(entE) 23-dihydroxybenzoate-AMP ligase component of enterobactin synthase multienzyme complex [Enterobactin (VF0228)] [Escherichia coli CFT073]
Kluyvera georgiana	WCH1410	GCA_001682915.1	24048	27856	+	entF	97.45	71.56	vfdb	NP_752604	(entF) enterobactin synthase multienzyme complex component ATP-dependent [Enterobactin (VF0228)] [Escherichia coli CFT073]
Kluyvera georgiana	WCH1410	GCA_001682915.1	30942	32157	+	entS	97.2	77.88	vfdb	NP_752609	(entS) enterobactin exporter iron-regulated [enterobactin (IA019)] [Escherichia coli CFT073]
Kluyvera georgiana	WCH1410	GCA_001682915.1	20158	22305	-	fepA	94.07	76.86	vfdb	NP_752600	(fepA) ferrienterobactin outer membrane transporter [Enterobactin (VF0228)] [Escherichia coli CFT073]
Kluyvera georgiana	WCH1410	GCA_001682915.1	32319	33186	-	fepB	90.7	78.92	vfdb	NP_752610	(fepB) ferrienterobactin ABC transporter periplasmic binding protein [Enterobactin (VF0228)] [Escherichia coli CFT073]
Kluyvera georgiana	WCH1410	GCA_001682915.1	28050	28837	-	fepC	96.45	77.57	vfdb	NP_752606	(fepC) ferrienterobactin ABC transporter ATPase [Enterobactin (VF0228)] [Escherichia coli CFT073]
Kluyvera georgiana	WCH1410	GCA_001682915.1	29844	30806	-	fepD	94.49	78.45	vfdb	NP_752608	(fepD) ferrienterobactin ABC transporter permease [Enterobactin (VF0228)] [Escherichia coli CFT073]
Kluyvera georgiana	WCH1410	GCA_001682915.1	28834	29747	-	fepG	91.84	78.28	vfdb	NP_752607	(fepG) iron-enterobactin ABC transporter permease [Enterobactin (VF0228)] [Escherichia coli CFT073]
Kluyvera georgiana	WCH1410	GCA_001682915.1	22695	23776	+	fes	88.11	71.44	vfdb	NP_752602	(fes) enterobactin/ferric enterobactin esterase [enterobactin (IA019)] [Escherichia coli CFT073]
Kluyvera georgiana	WCH1410	GCA_001682915.1	93460	93968	-	fimA	83.66	71.04	vfdb	NP_757241	(fimA) Type-1 fimbrial protein A chain precursor [Type 1 fimbriae (VF0221)] [Escherichia coli CFT073]
Kluyvera georgiana	WCH1410	GCA_001682915.1	92122	92717	-	fimC	82.09	74.33	vfdb	NP_757243	(fimC) Chaperone protein fimC precursor [Type 1 fimbriae (VF0221)] [Escherichia coli CFT073]
Kluyvera georgiana	WCH1410	GCA_001682915.1	89465	91927	-	fimD	93.06	74.49	vfdb	NP_757244	(fimD) Outer membrane usher protein fimD precursor [Type 1 fimbriae (VF0221)] [Escherichia coli CFT073]
Kluyvera georgiana	WCH1410	GCA_001682915.1	88894	89363	-	fimF	86.89	71.64	vfdb	NP_757245	(fimF) FimF protein precursor [Type 1 fimbriae (VF0221)] [Escherichia coli CFT073]
Kluyvera georgiana	WCH1410	GCA_001682915.1	88378	88816	-	fimG	87.1	71.3	vfdb	NP_757247	(fimG) FimG protein precursor [Type 1 fimbriae (VF0221)] [Escherichia coli CFT073]
Kluyvera georgiana	WCH1410	GCA_001682915.1	87460	88364	-	fimH	98.9	75.14	vfdb	NP_757248	(fimH) FimH protein precursor [Type 1 fimbriae (VF0221)] [Escherichia coli CFT073]
Kluyvera georgiana	WCH1410	GCA_001682915.1	92846	93351	-	fimI	93.7	67.98	vfdb	NP_757242	(fimI) Fimbrin-like protein fimI precursor [Type 1 fimbriae (VF0221)] [Escherichia coli CFT073]
Kluyvera georgiana	WCH1410	GCA_001682915.1	249	2456	-	iutA	96.67	78.39	vfdb	NP_755498	(iutA) ferric aerobactin receptor precusor IutA [Aerobactin (VF0229)] [Escherichia coli CFT073]
Kluyvera georgiana	WCH1410	GCA_001682915.1	53026	54507	+	kpsD	87.84	72.17	vfdb	AAA21682	(kpsD) KpsD [K1 capsule (VF0239)] [Escherichia coli O18:K1:H7 str. RS218]
Kluyvera georgiana	WCH1410	GCA_001682915.1	64197	64973	-	kpsM	99.74	70.6	vfdb	AAA24046	(kpsM) KpsM [K1 capsule (VF0239)] [Escherichia coli O18:K1:H7 str. RS218]
Kluyvera georgiana	WCH1410	GCA_001682915.1	418413	419468	-	ompA	100	84.66	vfdb	AAF37887	(ompA) outer membrane protein A [OmpA (VF0236)] [Escherichia coli O18:K1:H7 str. RS218]
Kluyvera intermedia	missing	DRR015587	38853	40177	-	aslA	92.72	81.96	vfdb	AAG10151	(aslA) putative arylsulfatase [AslA (VF0238)] [Escherichia coli O18:K1:H7 str. RS218]
Kluyvera intermedia	missing	DRR015587	66817	68712	-	chuA	97.18	77.74	vfdb	NP_756170	(chuA) Outer membrane heme/hemoglobin receptor ChuA [Chu (VF0227)] [Escherichia coli CFT073]
Kluyvera intermedia	missing	DRR015587	65783	66768	-	chuS	95.24	74.9	vfdb	NP_756169	(chuS) heme oxygenase ChuS [Chu (VF0227)] [Escherichia coli CFT073]
Kluyvera intermedia	missing	DRR015587	2217	2912	-	csgG	82.73	74.36	vfdb	NP_460110	(csgG) curli production assembly/transport protein CsgG [Agf (VF0103)] [Salmonella enterica subsp. enterica serovar Typhimurium str. LT2]
Kluyvera intermedia	missing	DRR015587	9392	10135	+	entA	99.6	80.64	vfdb	NP_752614	(entA) 23-dihydro-23-dihydroxybenzoate dehydrogenase [Enterobactin (VF0228)] [Escherichia coli CFT073]
Kluyvera intermedia	missing	DRR015587	8526	9380	+	entB	99.53	80.56	vfdb	NP_752613	(entB) isochorismatase [Enterobactin (VF0228)] [Escherichia coli CFT073]
Kluyvera intermedia	missing	DRR015587	5700	6892	+	entC	98.57	73.45	vfdb	NP_752611	(entC) isochorismate synthase 1 [Enterobactin (VF0228)] [Escherichia coli CFT073]
Kluyvera intermedia	missing	DRR015587	6913	8493	+	entE	98.14	77.99	vfdb	NP_752612	(entE) 23-dihydroxybenzoate-AMP ligase component of enterobactin synthase multienzyme complex [Enterobactin (VF0228)] [Escherichia coli CFT073]
Kluyvera intermedia	missing	DRR015587	347	4155	-	entF	97.24	72.37	vfdb	NP_752604	(entF) enterobactin synthase multienzyme complex component ATP-dependent [Enterobactin (VF0228)] [Escherichia coli CFT073]
Kluyvera intermedia	missing	DRR015587	3191	4404	+	entS	97.04	76.52	vfdb	NP_752609	(entS) enterobactin exporter iron-regulated [enterobactin (IA019)] [Escherichia coli CFT073]
Kluyvera intermedia	missing	DRR015587	5795	8068	+	fepA	98.62	75.7	vfdb	NP_752600	(fepA) ferrienterobactin outer membrane transporter [Enterobactin (VF0228)] [Escherichia coli CFT073]
Kluyvera intermedia	missing	DRR015587	4524	5420	-	fepB	93.31	79.13	vfdb	NP_752610	(fepB) ferrienterobactin ABC transporter periplasmic binding protein [Enterobactin (VF0228)] [Escherichia coli CFT073]
Kluyvera intermedia	missing	DRR015587	299	1086	-	fepC	96.45	78.45	vfdb	NP_752606	(fepC) ferrienterobactin ABC transporter ATPase [Enterobactin (VF0228)] [Escherichia coli CFT073]
Kluyvera intermedia	missing	DRR015587	2072	3063	-	fepD	96.95	76.08	vfdb	NP_752608	(fepD) ferrienterobactin ABC transporter permease [Enterobactin (VF0228)] [Escherichia coli CFT073]
Kluyvera intermedia	missing	DRR015587	1083	1994	-	fepG	91.24	77.89	vfdb	NP_752607	(fepG) iron-enterobactin ABC transporter permease [Enterobactin (VF0228)] [Escherichia coli CFT073]
Kluyvera intermedia	missing	DRR015587	4441	5518	-	fes	87.7	69.7	vfdb	NP_752602	(fes) enterobactin/ferric enterobactin esterase [enterobactin (IA019)] [Escherichia coli CFT073]
Kluyvera intermedia	missing	DRR015587	84177	84705	+	fimA	86.63	75.05	vfdb	NP_757241	(fimA) Type-1 fimbrial protein A chain precursor [Type 1 fimbriae (VF0221)] [Escherichia coli CFT073]
Kluyvera intermedia	missing	DRR015587	85453	86050	+	fimC	82.37	77.26	vfdb	NP_757243	(fimC) Chaperone protein fimC precursor [Type 1 fimbriae (VF0221)] [Escherichia coli CFT073]
Kluyvera intermedia	missing	DRR015587	86280	88693	+	fimD	91.43	75.01	vfdb	NP_757244	(fimD) Outer membrane usher protein fimD precursor [Type 1 fimbriae (VF0221)] [Escherichia coli CFT073]
Kluyvera intermedia	missing	DRR015587	89395	89837	+	fimG	87.9	75.17	vfdb	NP_757247	(fimG) FimG protein precursor [Type 1 fimbriae (VF0221)] [Escherichia coli CFT073]
Kluyvera intermedia	missing	DRR015587	89888	90755	+	fimH	95.18	73.73	vfdb	NP_757248	(fimH) FimH protein precursor [Type 1 fimbriae (VF0221)] [Escherichia coli CFT073]
Kluyvera intermedia	missing	DRR015587	84819	85305	+	fimI	89.63	71.02	vfdb	NP_757242	(fimI) Fimbrin-like protein fimI precursor [Type 1 fimbriae (VF0221)] [Escherichia coli CFT073]
Kluyvera intermedia	missing	DRR015587	98807	99715	+	gtrB	97.74	70.74	vfdb	NP_706258	(gtrB) bactoprenol glucosyl transferase [LPS (VF0124)] [Shigella flexneri 2a str. 301]
Kluyvera intermedia	missing	DRR015587	64167	66374	-	iutA	96.84	77.72	vfdb	NP_755498	(iutA) ferric aerobactin receptor precusor IutA [Aerobactin (VF0229)] [Escherichia coli CFT073]
Kluyvera intermedia	missing	DRR015587	149535	150590	-	ompA	100	84.56	vfdb	AAF37887	(ompA) outer membrane protein A [OmpA (VF0236)] [Escherichia coli O18:K1:H7 str. RS218]
Kluyvera intermedia	missing	DRR015587	66711	67849	-	senB	99.91	93.5	vfdb	YP_406304	(senB) enterotoxin [ShET2 (VF0258)] [Shigella flexneri 2a str. 301]
Kluyvera intermedia	missing	DRR015587	84249	86231	+	sinH	90.38	75.61	vfdb	NP_461452	(sinH) intimin-like protein [SinH (VF0400)] [Salmonella enterica subsp. enterica serovar Typhimurium str. LT2]
Kluyvera intermedia	missing	DRR015587	65417	66052	-	yagV/ecpE	82.8	68.45	vfdb	NP_286006	(yagV/ecpE) E. coli common pilus chaperone EcpE [ECP (VF0404)] [Escherichia coli O157:H7 str. EDL933]
Kluyvera intermedia	missing	DRR015587	65987	67573	-	yagW/ecpD	96.47	72.12	vfdb	NP_286007	(yagW/ecpD) polymerized tip adhesin of ECP fibers [ECP (VF0404)] [Escherichia coli O157:H7 str. EDL933]
Kluyvera intermedia	missing	DRR015587	67672	70084	-	yagX/ecpC	95.29	73.96	vfdb	NP_286008	(yagX/ecpC) E. coli common pilus usher EcpC [ECP (VF0404)] [Escherichia coli O157:H7 str. EDL933]
Kluyvera intermedia	missing	DRR015587	70169	70837	-	yagY/ecpB	99.55	71.73	vfdb	NP_286009	(yagY/ecpB) E. coli common pilus chaperone EcpB [ECP (VF0404)] [Escherichia coli O157:H7 str. EDL933]
Kluyvera intermedia	missing	DRR015587	70898	71428	-	yagZ/ecpA	89.97	76.55	vfdb	NP_286010	(yagZ/ecpA) E. coli common pilus structural subunit EcpA [ECP (VF0404)] [Escherichia coli O157:H7 str. EDL933]
Kluyvera intermedia	missing	DRR015712	1878	3202	-	aslA	92.72	82.04	vfdb	AAG10151	(aslA) putative arylsulfatase [AslA (VF0238)] [Escherichia coli O18:K1:H7 str. RS218]
Kluyvera intermedia	missing	DRR015712	51823	53718	+	chuA	97.28	77.61	vfdb	NP_756170	(chuA) Outer membrane heme/hemoglobin receptor ChuA [Chu (VF0227)] [Escherichia coli CFT073]
Kluyvera intermedia	missing	DRR015712	53767	54752	+	chuS	95.24	75	vfdb	NP_756169	(chuS) heme oxygenase ChuS [Chu (VF0227)] [Escherichia coli CFT073]
Kluyvera intermedia	missing	DRR015712	822	1531	+	chuV	88.39	71.91	vfdb	NP_756180	(chuV) ATP-binding hydrophilic protein ChuV [Chu (VF0227)] [Escherichia coli CFT073]
Kluyvera intermedia	missing	DRR015712	8758	10077	+	chuW	98.43	76.72	vfdb	NP_756176	(chuW) Putative oxygen independent coproporphyrinogen III oxidase [Chu (VF0227)] [Escherichia coli CFT073]
Kluyvera intermedia	missing	DRR015712	10090	10562	+	chuX	95.56	76.32	vfdb	NP_756177	(chuX) putative heme-binding protein ChuX [Chu (VF0227)] [Escherichia coli CFT073]
Kluyvera intermedia	missing	DRR015712	10584	11207	+	chuY	99.68	71.72	vfdb	NP_756178	(chuY) ChuY [Chu (VF0227)] [Escherichia coli CFT073]
Kluyvera intermedia	missing	DRR015712	88523	89218	+	csgG	82.73	74.64	vfdb	NP_460110	(csgG) curli production assembly/transport protein CsgG [Agf (VF0103)] [Salmonella enterica subsp. enterica serovar Typhimurium str. LT2]
Kluyvera intermedia	missing	DRR015712	47056	47799	-	entA	99.6	80.78	vfdb	NP_752614	(entA) 23-dihydro-23-dihydroxybenzoate dehydrogenase [Enterobactin (VF0228)] [Escherichia coli CFT073]
Kluyvera intermedia	missing	DRR015712	47811	48665	-	entB	99.53	79.74	vfdb	NP_752613	(entB) isochorismatase [Enterobactin (VF0228)] [Escherichia coli CFT073]
Kluyvera intermedia	missing	DRR015712	50299	51491	-	entC	98.82	73.55	vfdb	NP_752611	(entC) isochorismate synthase 1 [Enterobactin (VF0228)] [Escherichia coli CFT073]
Kluyvera intermedia	missing	DRR015712	48698	50278	-	entE	98.14	78.05	vfdb	NP_752612	(entE) 23-dihydroxybenzoate-AMP ligase component of enterobactin synthase multienzyme complex [Enterobactin (VF0228)] [Escherichia coli CFT073]
Kluyvera intermedia	missing	DRR015712	57668	61477	-	entF	97.06	72.61	vfdb	NP_752604	(entF) enterobactin synthase multienzyme complex component ATP-dependent [Enterobactin (VF0228)] [Escherichia coli CFT073]
Kluyvera intermedia	missing	DRR015712	52787	54000	-	entS	97.04	76.52	vfdb	NP_752609	(entS) enterobactin exporter iron-regulated [enterobactin (IA019)] [Escherichia coli CFT073]
Kluyvera intermedia	missing	DRR015712	63117	65390	+	fepA	98.62	75.7	vfdb	NP_752600	(fepA) ferrienterobactin outer membrane transporter [Enterobactin (VF0228)] [Escherichia coli CFT073]
Kluyvera intermedia	missing	DRR015712	51771	52667	+	fepB	93.31	78.47	vfdb	NP_752610	(fepB) ferrienterobactin ABC transporter periplasmic binding protein [Enterobactin (VF0228)] [Escherichia coli CFT073]
Kluyvera intermedia	missing	DRR015712	56105	56892	+	fepC	96.45	78.2	vfdb	NP_752606	(fepC) ferrienterobactin ABC transporter ATPase [Enterobactin (VF0228)] [Escherichia coli CFT073]
Kluyvera intermedia	missing	DRR015712	54149	55119	+	fepD	94.89	76.08	vfdb	NP_752608	(fepD) ferrienterobactin ABC transporter permease [Enterobactin (VF0228)] [Escherichia coli CFT073]
Kluyvera intermedia	missing	DRR015712	55197	56108	+	fepG	91.54	78.25	vfdb	NP_752607	(fepG) iron-enterobactin ABC transporter permease [Enterobactin (VF0228)] [Escherichia coli CFT073]
Kluyvera intermedia	missing	DRR015712	61763	62840	-	fes	87.7	69.61	vfdb	NP_752602	(fes) enterobactin/ferric enterobactin esterase [enterobactin (IA019)] [Escherichia coli CFT073]
Kluyvera intermedia	missing	DRR015712	91741	92269	-	fimA	86.63	74.86	vfdb	NP_757241	(fimA) Type-1 fimbrial protein A chain precursor [Type 1 fimbriae (VF0221)] [Escherichia coli CFT073]
Kluyvera intermedia	missing	DRR015712	90396	90993	-	fimC	82.37	77.26	vfdb	NP_757243	(fimC) Chaperone protein fimC precursor [Type 1 fimbriae (VF0221)] [Escherichia coli CFT073]
Kluyvera intermedia	missing	DRR015712	87753	90166	-	fimD	91.51	75.03	vfdb	NP_757244	(fimD) Outer membrane usher protein fimD precursor [Type 1 fimbriae (VF0221)] [Escherichia coli CFT073]
Kluyvera intermedia	missing	DRR015712	86609	87051	-	fimG	87.9	75.62	vfdb	NP_757247	(fimG) FimG protein precursor [Type 1 fimbriae (VF0221)] [Escherichia coli CFT073]
Kluyvera intermedia	missing	DRR015712	85691	86559	-	fimH	95.29	72.84	vfdb	NP_757248	(fimH) FimH protein precursor [Type 1 fimbriae (VF0221)] [Escherichia coli CFT073]
Kluyvera intermedia	missing	DRR015712	91141	91627	-	fimI	89.63	71.22	vfdb	NP_757242	(fimI) Fimbrin-like protein fimI precursor [Type 1 fimbriae (VF0221)] [Escherichia coli CFT073]
Kluyvera intermedia	missing	DRR015712	100477	101385	+	gtrB	97.74	70.63	vfdb	NP_706258	(gtrB) bactoprenol glucosyl transferase [LPS (VF0124)] [Shigella flexneri 2a str. 301]
Kluyvera intermedia	missing	DRR015712	83502	85709	-	iutA	96.84	78.12	vfdb	NP_755498	(iutA) ferric aerobactin receptor precusor IutA [Aerobactin (VF0229)] [Escherichia coli CFT073]
Kluyvera intermedia	missing	DRR015712	99190	100245	-	ompA	100	84.66	vfdb	AAF37887	(ompA) outer membrane protein A [OmpA (VF0236)] [Escherichia coli O18:K1:H7 str. RS218]
Kluyvera intermedia	missing	DRR015712	86121	87259	-	senB	99.91	93.24	vfdb	YP_406304	(senB) enterotoxin [ShET2 (VF0258)] [Shigella flexneri 2a str. 301]
Kluyvera intermedia	missing	DRR015712	7894	8716	+	shuT	82.28	72.77	vfdb	YP_405017	(shuT) periplasmic binding protein ShuT [Shu (VF0256)] [Shigella dysenteriae Sd197]
Kluyvera intermedia	missing	DRR015712	69	844	+	shuU	80.98	74.65	vfdb	YP_405014	(shuU) permease of iron compound ABC transport system [Shu (VF0256)] [Shigella dysenteriae Sd197]
Kluyvera intermedia	missing	DRR015712	83252	85234	-	sinH	90.38	75.61	vfdb	NP_461452	(sinH) intimin-like protein [SinH (VF0400)] [Salmonella enterica subsp. enterica serovar Typhimurium str. LT2]
Kluyvera intermedia	missing	DRR015712	274498	275133	-	yagV/ecpE	82.8	68.45	vfdb	NP_286006	(yagV/ecpE) E. coli common pilus chaperone EcpE [ECP (VF0404)] [Escherichia coli O157:H7 str. EDL933]
Kluyvera intermedia	missing	DRR015712	275068	276654	-	yagW/ecpD	96.47	72.06	vfdb	NP_286007	(yagW/ecpD) polymerized tip adhesin of ECP fibers [ECP (VF0404)] [Escherichia coli O157:H7 str. EDL933]
Kluyvera intermedia	missing	DRR015712	276753	279165	-	yagX/ecpC	95.29	74	vfdb	NP_286008	(yagX/ecpC) E. coli common pilus usher EcpC [ECP (VF0404)] [Escherichia coli O157:H7 str. EDL933]
Kluyvera intermedia	missing	DRR015712	279250	279918	-	yagY/ecpB	99.55	71.58	vfdb	NP_286009	(yagY/ecpB) E. coli common pilus chaperone EcpB [ECP (VF0404)] [Escherichia coli O157:H7 str. EDL933]
Kluyvera intermedia	missing	DRR015712	279979	280509	-	yagZ/ecpA	89.97	76.73	vfdb	NP_286010	(yagZ/ecpA) E. coli common pilus structural subunit EcpA [ECP (VF0404)] [Escherichia coli O157:H7 str. EDL933]
Kluyvera intermedia	missing	ERR885451	1878	3202	-	aslA	92.72	81.74	vfdb	AAG10151	(aslA) putative arylsulfatase [AslA (VF0238)] [Escherichia coli O18:K1:H7 str. RS218]
Kluyvera intermedia	missing	ERR885451	6254	8149	+	chuA	97.28	77.66	vfdb	NP_756170	(chuA) Outer membrane heme/hemoglobin receptor ChuA [Chu (VF0227)] [Escherichia coli CFT073]
Kluyvera intermedia	missing	ERR885451	8198	9183	+	chuS	95.24	74.7	vfdb	NP_756169	(chuS) heme oxygenase ChuS [Chu (VF0227)] [Escherichia coli CFT073]
Kluyvera intermedia	missing	ERR885451	11633	12328	+	csgG	82.73	74.64	vfdb	NP_460110	(csgG) curli production assembly/transport protein CsgG [Agf (VF0103)] [Salmonella enterica subsp. enterica serovar Typhimurium str. LT2]
Kluyvera intermedia	missing	ERR885451	34915	35658	-	entA	99.6	80.24	vfdb	NP_752614	(entA) 23-dihydro-23-dihydroxybenzoate dehydrogenase [Enterobactin (VF0228)] [Escherichia coli CFT073]
Kluyvera intermedia	missing	ERR885451	35670	36524	-	entB	99.53	79.74	vfdb	NP_752613	(entB) isochorismatase [Enterobactin (VF0228)] [Escherichia coli CFT073]
Kluyvera intermedia	missing	ERR885451	38158	39350	-	entC	98.82	73.63	vfdb	NP_752611	(entC) isochorismate synthase 1 [Enterobactin (VF0228)] [Escherichia coli CFT073]
Kluyvera intermedia	missing	ERR885451	36557	38137	-	entE	98.14	77.92	vfdb	NP_752612	(entE) 23-dihydroxybenzoate-AMP ligase component of enterobactin synthase multienzyme complex [Enterobactin (VF0228)] [Escherichia coli CFT073]
Kluyvera intermedia	missing	ERR885451	45527	49335	-	entF	97.17	72.49	vfdb	NP_752604	(entF) enterobactin synthase multienzyme complex component ATP-dependent [Enterobactin (VF0228)] [Escherichia coli CFT073]
Kluyvera intermedia	missing	ERR885451	40646	41859	-	entS	97.04	76.28	vfdb	NP_752609	(entS) enterobactin exporter iron-regulated [enterobactin (IA019)] [Escherichia coli CFT073]
Kluyvera intermedia	missing	ERR885451	50975	53248	+	fepA	98.62	75.88	vfdb	NP_752600	(fepA) ferrienterobactin outer membrane transporter [Enterobactin (VF0228)] [Escherichia coli CFT073]
Kluyvera intermedia	missing	ERR885451	39630	40526	+	fepB	93.31	78.8	vfdb	NP_752610	(fepB) ferrienterobactin ABC transporter periplasmic binding protein [Enterobactin (VF0228)] [Escherichia coli CFT073]
Kluyvera intermedia	missing	ERR885451	43964	44751	+	fepC	96.45	78.83	vfdb	NP_752606	(fepC) ferrienterobactin ABC transporter ATPase [Enterobactin (VF0228)] [Escherichia coli CFT073]
Kluyvera intermedia	missing	ERR885451	41987	42978	+	fepD	96.95	76.18	vfdb	NP_752608	(fepD) ferrienterobactin ABC transporter permease [Enterobactin (VF0228)] [Escherichia coli CFT073]
Kluyvera intermedia	missing	ERR885451	43056	43967	+	fepG	91.54	78.36	vfdb	NP_752607	(fepG) iron-enterobactin ABC transporter permease [Enterobactin (VF0228)] [Escherichia coli CFT073]
Kluyvera intermedia	missing	ERR885451	49615	50698	-	fes	88.2	69.87	vfdb	NP_752602	(fes) enterobactin/ferric enterobactin esterase [enterobactin (IA019)] [Escherichia coli CFT073]
Kluyvera intermedia	missing	ERR885451	15166	16074	-	gtrB	97.74	70.52	vfdb	NP_706258	(gtrB) bactoprenol glucosyl transferase [LPS (VF0124)] [Shigella flexneri 2a str. 301]
Kluyvera intermedia	missing	ERR885451	304912	307119	+	iutA	96.84	77.9	vfdb	NP_755498	(iutA) ferric aerobactin receptor precusor IutA [Aerobactin (VF0229)] [Escherichia coli CFT073]
Kluyvera intermedia	missing	ERR885451	13255	14310	+	ompA	100	84.66	vfdb	AAF37887	(ompA) outer membrane protein A [OmpA (VF0236)] [Escherichia coli O18:K1:H7 str. RS218]
Kluyvera intermedia	missing	ERR885451	303362	304500	+	senB	99.91	93.59	vfdb	YP_406304	(senB) enterotoxin [ShET2 (VF0258)] [Shigella flexneri 2a str. 301]
Kluyvera intermedia	missing	ERR885451	75729	77711	+	sinH	90.38	75.55	vfdb	NP_461452	(sinH) intimin-like protein [SinH (VF0400)] [Salmonella enterica subsp. enterica serovar Typhimurium str. LT2]
Kluyvera intermedia	missing	ERR885451	216473	217108	-	yagV/ecpE	82.8	68.29	vfdb	NP_286006	(yagV/ecpE) E. coli common pilus chaperone EcpE [ECP (VF0404)] [Escherichia coli O157:H7 str. EDL933]
Kluyvera intermedia	missing	ERR885451	217043	218629	-	yagW/ecpD	96.47	71.87	vfdb	NP_286007	(yagW/ecpD) polymerized tip adhesin of ECP fibers [ECP (VF0404)] [Escherichia coli O157:H7 str. EDL933]
Kluyvera intermedia	missing	ERR885451	218728	221140	-	yagX/ecpC	95.29	74.04	vfdb	NP_286008	(yagX/ecpC) E. coli common pilus usher EcpC [ECP (VF0404)] [Escherichia coli O157:H7 str. EDL933]
Kluyvera intermedia	missing	ERR885451	221225	221893	-	yagY/ecpB	99.55	71.58	vfdb	NP_286009	(yagY/ecpB) E. coli common pilus chaperone EcpB [ECP (VF0404)] [Escherichia coli O157:H7 str. EDL933]
Kluyvera intermedia	missing	ERR885451	221954	222484	-	yagZ/ecpA	89.8	76.59	vfdb	NP_286010	(yagZ/ecpA) E. coli common pilus structural subunit EcpA [ECP (VF0404)] [Escherichia coli O157:H7 str. EDL933]
Kluyvera intermedia	NBRC 102594	GCA_001598315.1	39001	40325	-	aslA	92.72	82.04	vfdb	AAG10151	(aslA) putative arylsulfatase [AslA (VF0238)] [Escherichia coli O18:K1:H7 str. RS218]
Kluyvera intermedia	NBRC 102594	GCA_001598315.1	53390	55285	+	chuA	97.28	77.61	vfdb	NP_756170	(chuA) Outer membrane heme/hemoglobin receptor ChuA [Chu (VF0227)] [Escherichia coli CFT073]
Kluyvera intermedia	NBRC 102594	GCA_001598315.1	55334	56319	+	chuS	95.24	75	vfdb	NP_756169	(chuS) heme oxygenase ChuS [Chu (VF0227)] [Escherichia coli CFT073]
Kluyvera intermedia	NBRC 102594	GCA_001598315.1	24411	25120	-	chuV	88.39	71.91	vfdb	NP_756180	(chuV) ATP-binding hydrophilic protein ChuV [Chu (VF0227)] [Escherichia coli CFT073]
Kluyvera intermedia	NBRC 102594	GCA_001598315.1	8043	9362	+	chuW	98.43	76.72	vfdb	NP_756176	(chuW) Putative oxygen independent coproporphyrinogen III oxidase [Chu (VF0227)] [Escherichia coli CFT073]
Kluyvera intermedia	NBRC 102594	GCA_001598315.1	9375	9847	+	chuX	95.56	76.32	vfdb	NP_756177	(chuX) putative heme-binding protein ChuX [Chu (VF0227)] [Escherichia coli CFT073]
Kluyvera intermedia	NBRC 102594	GCA_001598315.1	9869	10492	+	chuY	99.68	71.72	vfdb	NP_756178	(chuY) ChuY [Chu (VF0227)] [Escherichia coli CFT073]
Kluyvera intermedia	NBRC 102594	GCA_001598315.1	123897	124592	-	csgG	82.73	74.64	vfdb	NP_460110	(csgG) curli production assembly/transport protein CsgG [Agf (VF0103)] [Salmonella enterica subsp. enterica serovar Typhimurium str. LT2]
Kluyvera intermedia	NBRC 102594	GCA_001598315.1	113359	114102	-	entA	99.6	80.78	vfdb	NP_752614	(entA) 23-dihydro-23-dihydroxybenzoate dehydrogenase [Enterobactin (VF0228)] [Escherichia coli CFT073]
Kluyvera intermedia	NBRC 102594	GCA_001598315.1	114114	114968	-	entB	99.53	79.74	vfdb	NP_752613	(entB) isochorismatase [Enterobactin (VF0228)] [Escherichia coli CFT073]
Kluyvera intermedia	NBRC 102594	GCA_001598315.1	116602	117794	-	entC	98.82	73.55	vfdb	NP_752611	(entC) isochorismate synthase 1 [Enterobactin (VF0228)] [Escherichia coli CFT073]
Kluyvera intermedia	NBRC 102594	GCA_001598315.1	115001	116581	-	entE	98.14	78.05	vfdb	NP_752612	(entE) 23-dihydroxybenzoate-AMP ligase component of enterobactin synthase multienzyme complex [Enterobactin (VF0228)] [Escherichia coli CFT073]
Kluyvera intermedia	NBRC 102594	GCA_001598315.1	123971	127780	-	entF	97.06	72.61	vfdb	NP_752604	(entF) enterobactin synthase multienzyme complex component ATP-dependent [Enterobactin (VF0228)] [Escherichia coli CFT073]
Kluyvera intermedia	NBRC 102594	GCA_001598315.1	119090	120303	-	entS	97.04	76.52	vfdb	NP_752609	(entS) enterobactin exporter iron-regulated [enterobactin (IA019)] [Escherichia coli CFT073]
Kluyvera intermedia	NBRC 102594	GCA_001598315.1	129420	131693	+	fepA	98.62	75.7	vfdb	NP_752600	(fepA) ferrienterobactin outer membrane transporter [Enterobactin (VF0228)] [Escherichia coli CFT073]
Kluyvera intermedia	NBRC 102594	GCA_001598315.1	118074	118970	+	fepB	93.31	78.47	vfdb	NP_752610	(fepB) ferrienterobactin ABC transporter periplasmic binding protein [Enterobactin (VF0228)] [Escherichia coli CFT073]
Kluyvera intermedia	NBRC 102594	GCA_001598315.1	122408	123195	+	fepC	96.45	78.2	vfdb	NP_752606	(fepC) ferrienterobactin ABC transporter ATPase [Enterobactin (VF0228)] [Escherichia coli CFT073]
Kluyvera intermedia	NBRC 102594	GCA_001598315.1	120452	121422	+	fepD	94.89	76.08	vfdb	NP_752608	(fepD) ferrienterobactin ABC transporter permease [Enterobactin (VF0228)] [Escherichia coli CFT073]
Kluyvera intermedia	NBRC 102594	GCA_001598315.1	121500	122411	+	fepG	91.54	78.25	vfdb	NP_752607	(fepG) iron-enterobactin ABC transporter permease [Enterobactin (VF0228)] [Escherichia coli CFT073]
Kluyvera intermedia	NBRC 102594	GCA_001598315.1	128066	129143	-	fes	87.7	69.61	vfdb	NP_752602	(fes) enterobactin/ferric enterobactin esterase [enterobactin (IA019)] [Escherichia coli CFT073]
Kluyvera intermedia	NBRC 102594	GCA_001598315.1	74031	74559	+	fimA	86.63	74.86	vfdb	NP_757241	(fimA) Type-1 fimbrial protein A chain precursor [Type 1 fimbriae (VF0221)] [Escherichia coli CFT073]
Kluyvera intermedia	NBRC 102594	GCA_001598315.1	75307	75904	+	fimC	82.37	77.26	vfdb	NP_757243	(fimC) Chaperone protein fimC precursor [Type 1 fimbriae (VF0221)] [Escherichia coli CFT073]
Kluyvera intermedia	NBRC 102594	GCA_001598315.1	76134	78547	+	fimD	91.51	75.03	vfdb	NP_757244	(fimD) Outer membrane usher protein fimD precursor [Type 1 fimbriae (VF0221)] [Escherichia coli CFT073]
Kluyvera intermedia	NBRC 102594	GCA_001598315.1	79249	79691	+	fimG	87.9	75.62	vfdb	NP_757247	(fimG) FimG protein precursor [Type 1 fimbriae (VF0221)] [Escherichia coli CFT073]
Kluyvera intermedia	NBRC 102594	GCA_001598315.1	79741	80609	+	fimH	95.29	72.84	vfdb	NP_757248	(fimH) FimH protein precursor [Type 1 fimbriae (VF0221)] [Escherichia coli CFT073]
Kluyvera intermedia	NBRC 102594	GCA_001598315.1	74673	75159	+	fimI	89.63	71.22	vfdb	NP_757242	(fimI) Fimbrin-like protein fimI precursor [Type 1 fimbriae (VF0221)] [Escherichia coli CFT073]
Kluyvera intermedia	NBRC 102594	GCA_001598315.1	74513	75421	+	gtrB	97.74	70.63	vfdb	NP_706258	(gtrB) bactoprenol glucosyl transferase [LPS (VF0124)] [Shigella flexneri 2a str. 301]
Kluyvera intermedia	NBRC 102594	GCA_001598315.1	5938	8145	+	iutA	96.84	78.12	vfdb	NP_755498	(iutA) ferric aerobactin receptor precusor IutA [Aerobactin (VF0229)] [Escherichia coli CFT073]
Kluyvera intermedia	NBRC 102594	GCA_001598315.1	24900	25955	+	ompA	100	84.66	vfdb	AAF37887	(ompA) outer membrane protein A [OmpA (VF0236)] [Escherichia coli O18:K1:H7 str. RS218]
Kluyvera intermedia	NBRC 102594	GCA_001598315.1	4388	5526	+	senB	99.91	93.24	vfdb	YP_406304	(senB) enterotoxin [ShET2 (VF0258)] [Shigella flexneri 2a str. 301]
Kluyvera intermedia	NBRC 102594	GCA_001598315.1	7179	8001	+	shuT	82.28	72.77	vfdb	YP_405017	(shuT) periplasmic binding protein ShuT [Shu (VF0256)] [Shigella dysenteriae Sd197]
Kluyvera intermedia	NBRC 102594	GCA_001598315.1	25098	25873	-	shuU	80.98	74.65	vfdb	YP_405014	(shuU) permease of iron compound ABC transport system [Shu (VF0256)] [Shigella dysenteriae Sd197]
Kluyvera intermedia	NBRC 102594	GCA_001598315.1	83186	85168	-	sinH	90.38	75.61	vfdb	NP_461452	(sinH) intimin-like protein [SinH (VF0400)] [Salmonella enterica subsp. enterica serovar Typhimurium str. LT2]
Kluyvera intermedia	NBRC 102594	GCA_001598315.1	106419	107054	-	yagV/ecpE	82.8	68.45	vfdb	NP_286006	(yagV/ecpE) E. coli common pilus chaperone EcpE [ECP (VF0404)] [Escherichia coli O157:H7 str. EDL933]
Kluyvera intermedia	NBRC 102594	GCA_001598315.1	106989	108575	-	yagW/ecpD	96.47	72.06	vfdb	NP_286007	(yagW/ecpD) polymerized tip adhesin of ECP fibers [ECP (VF0404)] [Escherichia coli O157:H7 str. EDL933]
Kluyvera intermedia	NBRC 102594	GCA_001598315.1	108674	111086	-	yagX/ecpC	95.29	74	vfdb	NP_286008	(yagX/ecpC) E. coli common pilus usher EcpC [ECP (VF0404)] [Escherichia coli O157:H7 str. EDL933]
Kluyvera intermedia	NBRC 102594	GCA_001598315.1	111171	111839	-	yagY/ecpB	99.55	71.58	vfdb	NP_286009	(yagY/ecpB) E. coli common pilus chaperone EcpB [ECP (VF0404)] [Escherichia coli O157:H7 str. EDL933]
Kluyvera intermedia	NBRC 102594	GCA_001598315.1	111900	112430	-	yagZ/ecpA	89.97	76.73	vfdb	NP_286010	(yagZ/ecpA) E. coli common pilus structural subunit EcpA [ECP (VF0404)] [Escherichia coli O157:H7 str. EDL933]
Kluyvera intermedia	N2-1	GCA_009649915.1	4488245	4489561	+	aslA	92.16	81.78	vfdb	AAG10151	(aslA) putative arylsulfatase [AslA (VF0238)] [Escherichia coli O18:K1:H7 str. RS218]
Kluyvera intermedia	N2-1	GCA_009649915.1	1023910	1025805	-	chuA	97.28	77.77	vfdb	NP_756170	(chuA) Outer membrane heme/hemoglobin receptor ChuA [Chu (VF0227)] [Escherichia coli CFT073]
Kluyvera intermedia	N2-1	GCA_009649915.1	1022876	1023861	-	chuS	95.24	74.7	vfdb	NP_756169	(chuS) heme oxygenase ChuS [Chu (VF0227)] [Escherichia coli CFT073]
Kluyvera intermedia	N2-1	GCA_009649915.1	2721520	2722215	-	csgG	82.73	74.93	vfdb	NP_460110	(csgG) curli production assembly/transport protein CsgG [Agf (VF0103)] [Salmonella enterica subsp. enterica serovar Typhimurium str. LT2]
Kluyvera intermedia	N2-1	GCA_009649915.1	3326353	3327096	-	entA	99.6	80.51	vfdb	NP_752614	(entA) 23-dihydro-23-dihydroxybenzoate dehydrogenase [Enterobactin (VF0228)] [Escherichia coli CFT073]
Kluyvera intermedia	N2-1	GCA_009649915.1	3327108	3327962	-	entB	99.53	80.67	vfdb	NP_752613	(entB) isochorismatase [Enterobactin (VF0228)] [Escherichia coli CFT073]
Kluyvera intermedia	N2-1	GCA_009649915.1	3329596	3330788	-	entC	98.82	73.55	vfdb	NP_752611	(entC) isochorismate synthase 1 [Enterobactin (VF0228)] [Escherichia coli CFT073]
Kluyvera intermedia	N2-1	GCA_009649915.1	3327995	3329575	-	entE	98.14	77.99	vfdb	NP_752612	(entE) 23-dihydroxybenzoate-AMP ligase component of enterobactin synthase multienzyme complex [Enterobactin (VF0228)] [Escherichia coli CFT073]
Kluyvera intermedia	N2-1	GCA_009649915.1	3336523	3340331	-	entF	97.09	72.49	vfdb	NP_752604	(entF) enterobactin synthase multienzyme complex component ATP-dependent [Enterobactin (VF0228)] [Escherichia coli CFT073]
Kluyvera intermedia	N2-1	GCA_009649915.1	3332084	3333297	-	entS	97.04	76.52	vfdb	NP_752609	(entS) enterobactin exporter iron-regulated [enterobactin (IA019)] [Escherichia coli CFT073]
Kluyvera intermedia	N2-1	GCA_009649915.1	3341971	3344244	+	fepA	98.62	75.97	vfdb	NP_752600	(fepA) ferrienterobactin outer membrane transporter [Enterobactin (VF0228)] [Escherichia coli CFT073]
Kluyvera intermedia	N2-1	GCA_009649915.1	3331068	3331964	+	fepB	93.31	78.8	vfdb	NP_752610	(fepB) ferrienterobactin ABC transporter periplasmic binding protein [Enterobactin (VF0228)] [Escherichia coli CFT073]
Kluyvera intermedia	N2-1	GCA_009649915.1	3335402	3336189	+	fepC	96.45	78.83	vfdb	NP_752606	(fepC) ferrienterobactin ABC transporter ATPase [Enterobactin (VF0228)] [Escherichia coli CFT073]
Kluyvera intermedia	N2-1	GCA_009649915.1	3333446	3334416	+	fepD	94.89	76.18	vfdb	NP_752608	(fepD) ferrienterobactin ABC transporter permease [Enterobactin (VF0228)] [Escherichia coli CFT073]
Kluyvera intermedia	N2-1	GCA_009649915.1	3334494	3335405	+	fepG	91.24	78.11	vfdb	NP_752607	(fepG) iron-enterobactin ABC transporter permease [Enterobactin (VF0228)] [Escherichia coli CFT073]
Kluyvera intermedia	N2-1	GCA_009649915.1	3340617	3341694	-	fes	87.7	69.98	vfdb	NP_752602	(fes) enterobactin/ferric enterobactin esterase [enterobactin (IA019)] [Escherichia coli CFT073]
Kluyvera intermedia	N2-1	GCA_009649915.1	742935	743463	+	fimA	86.63	75.05	vfdb	NP_757241	(fimA) Type-1 fimbrial protein A chain precursor [Type 1 fimbriae (VF0221)] [Escherichia coli CFT073]
Kluyvera intermedia	N2-1	GCA_009649915.1	744211	744808	+	fimC	82.37	77.26	vfdb	NP_757243	(fimC) Chaperone protein fimC precursor [Type 1 fimbriae (VF0221)] [Escherichia coli CFT073]
Kluyvera intermedia	N2-1	GCA_009649915.1	745038	747451	+	fimD	91.54	74.65	vfdb	NP_757244	(fimD) Outer membrane usher protein fimD precursor [Type 1 fimbriae (VF0221)] [Escherichia coli CFT073]
Kluyvera intermedia	N2-1	GCA_009649915.1	747611	748079	+	fimF	87.83	68.87	vfdb	NP_757245	(fimF) FimF protein precursor [Type 1 fimbriae (VF0221)] [Escherichia coli CFT073]
Kluyvera intermedia	N2-1	GCA_009649915.1	748153	748595	+	fimG	87.9	75.17	vfdb	NP_757247	(fimG) FimG protein precursor [Type 1 fimbriae (VF0221)] [Escherichia coli CFT073]
Kluyvera intermedia	N2-1	GCA_009649915.1	748645	749513	+	fimH	95.29	73.76	vfdb	NP_757248	(fimH) FimH protein precursor [Type 1 fimbriae (VF0221)] [Escherichia coli CFT073]
Kluyvera intermedia	N2-1	GCA_009649915.1	743577	744063	+	fimI	89.63	71.02	vfdb	NP_757242	(fimI) Fimbrin-like protein fimI precursor [Type 1 fimbriae (VF0221)] [Escherichia coli CFT073]
Kluyvera intermedia	N2-1	GCA_009649915.1	3381535	3382433	+	gtrB	96.67	73.97	vfdb	NP_706258	(gtrB) bactoprenol glucosyl transferase [LPS (VF0124)] [Shigella flexneri 2a str. 301]
Kluyvera intermedia	N2-1	GCA_009649915.1	1497629	1498537	-	gtrB	97.74	70.85	vfdb	NP_706258	(gtrB) bactoprenol glucosyl transferase [LPS (VF0124)] [Shigella flexneri 2a str. 301]
Kluyvera intermedia	N2-1	GCA_009649915.1	3630831	3633038	+	iutA	96.84	78.03	vfdb	NP_755498	(iutA) ferric aerobactin receptor precusor IutA [Aerobactin (VF0229)] [Escherichia coli CFT073]
Kluyvera intermedia	N2-1	GCA_009649915.1	2938532	2939587	+	ompA	100	84.66	vfdb	AAF37887	(ompA) outer membrane protein A [OmpA (VF0236)] [Escherichia coli O18:K1:H7 str. RS218]
Kluyvera intermedia	N2-1	GCA_009649915.1	3629281	3630419	+	senB	99.91	93.68	vfdb	YP_406304	(senB) enterotoxin [ShET2 (VF0258)] [Shigella flexneri 2a str. 301]
Kluyvera intermedia	N2-1	GCA_009649915.1	1229275	1231257	+	sinH	90.38	75.4	vfdb	NP_461452	(sinH) intimin-like protein [SinH (VF0400)] [Salmonella enterica subsp. enterica serovar Typhimurium str. LT2]
Kluyvera intermedia	N2-1	GCA_009649915.1	3542411	3543046	-	yagV/ecpE	82.8	68.45	vfdb	NP_286006	(yagV/ecpE) E. coli common pilus chaperone EcpE [ECP (VF0404)] [Escherichia coli O157:H7 str. EDL933]
Kluyvera intermedia	N2-1	GCA_009649915.1	3542981	3544567	-	yagW/ecpD	96.47	72.06	vfdb	NP_286007	(yagW/ecpD) polymerized tip adhesin of ECP fibers [ECP (VF0404)] [Escherichia coli O157:H7 str. EDL933]
Kluyvera intermedia	N2-1	GCA_009649915.1	3544666	3547078	-	yagX/ecpC	95.29	74	vfdb	NP_286008	(yagX/ecpC) E. coli common pilus usher EcpC [ECP (VF0404)] [Escherichia coli O157:H7 str. EDL933]
Kluyvera intermedia	N2-1	GCA_009649915.1	3547163	3547831	-	yagY/ecpB	99.55	71.58	vfdb	NP_286009	(yagY/ecpB) E. coli common pilus chaperone EcpB [ECP (VF0404)] [Escherichia coli O157:H7 str. EDL933]
Kluyvera intermedia	N2-1	GCA_009649915.1	3547892	3548422	-	yagZ/ecpA	89.97	76.73	vfdb	NP_286010	(yagZ/ecpA) E. coli common pilus structural subunit EcpA [ECP (VF0404)] [Escherichia coli O157:H7 str. EDL933]
Kluyvera intermedia	HR2	GCA_009650415.1	4488245	4489561	+	aslA	92.16	81.78	vfdb	AAG10151	(aslA) putative arylsulfatase [AslA (VF0238)] [Escherichia coli O18:K1:H7 str. RS218]
Kluyvera intermedia	HR2	GCA_009650415.1	1023910	1025805	-	chuA	97.28	77.77	vfdb	NP_756170	(chuA) Outer membrane heme/hemoglobin receptor ChuA [Chu (VF0227)] [Escherichia coli CFT073]
Kluyvera intermedia	HR2	GCA_009650415.1	1022876	1023861	-	chuS	95.24	74.7	vfdb	NP_756169	(chuS) heme oxygenase ChuS [Chu (VF0227)] [Escherichia coli CFT073]
Kluyvera intermedia	HR2	GCA_009650415.1	2721520	2722215	-	csgG	82.73	74.93	vfdb	NP_460110	(csgG) curli production assembly/transport protein CsgG [Agf (VF0103)] [Salmonella enterica subsp. enterica serovar Typhimurium str. LT2]
Kluyvera intermedia	HR2	GCA_009650415.1	3326353	3327096	-	entA	99.6	80.51	vfdb	NP_752614	(entA) 23-dihydro-23-dihydroxybenzoate dehydrogenase [Enterobactin (VF0228)] [Escherichia coli CFT073]
Kluyvera intermedia	HR2	GCA_009650415.1	3327108	3327962	-	entB	99.53	80.67	vfdb	NP_752613	(entB) isochorismatase [Enterobactin (VF0228)] [Escherichia coli CFT073]
Kluyvera intermedia	HR2	GCA_009650415.1	3329596	3330788	-	entC	98.82	73.55	vfdb	NP_752611	(entC) isochorismate synthase 1 [Enterobactin (VF0228)] [Escherichia coli CFT073]
Kluyvera intermedia	HR2	GCA_009650415.1	3327995	3329575	-	entE	98.14	77.99	vfdb	NP_752612	(entE) 23-dihydroxybenzoate-AMP ligase component of enterobactin synthase multienzyme complex [Enterobactin (VF0228)] [Escherichia coli CFT073]
Kluyvera intermedia	HR2	GCA_009650415.1	3336523	3340331	-	entF	97.09	72.49	vfdb	NP_752604	(entF) enterobactin synthase multienzyme complex component ATP-dependent [Enterobactin (VF0228)] [Escherichia coli CFT073]
Kluyvera intermedia	HR2	GCA_009650415.1	3332084	3333297	-	entS	97.04	76.52	vfdb	NP_752609	(entS) enterobactin exporter iron-regulated [enterobactin (IA019)] [Escherichia coli CFT073]
Kluyvera intermedia	HR2	GCA_009650415.1	3341971	3344244	+	fepA	98.62	75.97	vfdb	NP_752600	(fepA) ferrienterobactin outer membrane transporter [Enterobactin (VF0228)] [Escherichia coli CFT073]
Kluyvera intermedia	HR2	GCA_009650415.1	3331068	3331964	+	fepB	93.31	78.8	vfdb	NP_752610	(fepB) ferrienterobactin ABC transporter periplasmic binding protein [Enterobactin (VF0228)] [Escherichia coli CFT073]
Kluyvera intermedia	HR2	GCA_009650415.1	3335402	3336189	+	fepC	96.45	78.83	vfdb	NP_752606	(fepC) ferrienterobactin ABC transporter ATPase [Enterobactin (VF0228)] [Escherichia coli CFT073]
Kluyvera intermedia	HR2	GCA_009650415.1	3333446	3334416	+	fepD	94.89	76.18	vfdb	NP_752608	(fepD) ferrienterobactin ABC transporter permease [Enterobactin (VF0228)] [Escherichia coli CFT073]
Kluyvera intermedia	HR2	GCA_009650415.1	3334494	3335405	+	fepG	91.24	78.11	vfdb	NP_752607	(fepG) iron-enterobactin ABC transporter permease [Enterobactin (VF0228)] [Escherichia coli CFT073]
Kluyvera intermedia	HR2	GCA_009650415.1	3340617	3341694	-	fes	87.7	69.98	vfdb	NP_752602	(fes) enterobactin/ferric enterobactin esterase [enterobactin (IA019)] [Escherichia coli CFT073]
Kluyvera intermedia	HR2	GCA_009650415.1	742935	743463	+	fimA	86.63	75.05	vfdb	NP_757241	(fimA) Type-1 fimbrial protein A chain precursor [Type 1 fimbriae (VF0221)] [Escherichia coli CFT073]
Kluyvera intermedia	HR2	GCA_009650415.1	744211	744808	+	fimC	82.37	77.26	vfdb	NP_757243	(fimC) Chaperone protein fimC precursor [Type 1 fimbriae (VF0221)] [Escherichia coli CFT073]
Kluyvera intermedia	HR2	GCA_009650415.1	745038	747451	+	fimD	91.54	74.65	vfdb	NP_757244	(fimD) Outer membrane usher protein fimD precursor [Type 1 fimbriae (VF0221)] [Escherichia coli CFT073]
Kluyvera intermedia	HR2	GCA_009650415.1	747611	748079	+	fimF	87.83	68.87	vfdb	NP_757245	(fimF) FimF protein precursor [Type 1 fimbriae (VF0221)] [Escherichia coli CFT073]
Kluyvera intermedia	HR2	GCA_009650415.1	748153	748595	+	fimG	87.9	75.17	vfdb	NP_757247	(fimG) FimG protein precursor [Type 1 fimbriae (VF0221)] [Escherichia coli CFT073]
Kluyvera intermedia	HR2	GCA_009650415.1	748645	749513	+	fimH	95.29	73.76	vfdb	NP_757248	(fimH) FimH protein precursor [Type 1 fimbriae (VF0221)] [Escherichia coli CFT073]
Kluyvera intermedia	HR2	GCA_009650415.1	743577	744063	+	fimI	89.63	71.02	vfdb	NP_757242	(fimI) Fimbrin-like protein fimI precursor [Type 1 fimbriae (VF0221)] [Escherichia coli CFT073]
Kluyvera intermedia	HR2	GCA_009650415.1	3381535	3382433	+	gtrB	96.67	73.97	vfdb	NP_706258	(gtrB) bactoprenol glucosyl transferase [LPS (VF0124)] [Shigella flexneri 2a str. 301]
Kluyvera intermedia	HR2	GCA_009650415.1	1497629	1498537	-	gtrB	97.74	70.85	vfdb	NP_706258	(gtrB) bactoprenol glucosyl transferase [LPS (VF0124)] [Shigella flexneri 2a str. 301]
Kluyvera intermedia	HR2	GCA_009650415.1	3630831	3633038	+	iutA	96.84	78.03	vfdb	NP_755498	(iutA) ferric aerobactin receptor precusor IutA [Aerobactin (VF0229)] [Escherichia coli CFT073]
Kluyvera intermedia	HR2	GCA_009650415.1	2938532	2939587	+	ompA	100	84.66	vfdb	AAF37887	(ompA) outer membrane protein A [OmpA (VF0236)] [Escherichia coli O18:K1:H7 str. RS218]
Kluyvera intermedia	HR2	GCA_009650415.1	3629281	3630419	+	senB	99.91	93.68	vfdb	YP_406304	(senB) enterotoxin [ShET2 (VF0258)] [Shigella flexneri 2a str. 301]
Kluyvera intermedia	HR2	GCA_009650415.1	1229275	1231257	+	sinH	90.38	75.4	vfdb	NP_461452	(sinH) intimin-like protein [SinH (VF0400)] [Salmonella enterica subsp. enterica serovar Typhimurium str. LT2]
Kluyvera intermedia	HR2	GCA_009650415.1	3542411	3543046	-	yagV/ecpE	82.8	68.45	vfdb	NP_286006	(yagV/ecpE) E. coli common pilus chaperone EcpE [ECP (VF0404)] [Escherichia coli O157:H7 str. EDL933]
Kluyvera intermedia	HR2	GCA_009650415.1	3542981	3544567	-	yagW/ecpD	96.47	72.06	vfdb	NP_286007	(yagW/ecpD) polymerized tip adhesin of ECP fibers [ECP (VF0404)] [Escherichia coli O157:H7 str. EDL933]
Kluyvera intermedia	HR2	GCA_009650415.1	3544666	3547078	-	yagX/ecpC	95.29	74	vfdb	NP_286008	(yagX/ecpC) E. coli common pilus usher EcpC [ECP (VF0404)] [Escherichia coli O157:H7 str. EDL933]
Kluyvera intermedia	HR2	GCA_009650415.1	3547163	3547831	-	yagY/ecpB	99.55	71.58	vfdb	NP_286009	(yagY/ecpB) E. coli common pilus chaperone EcpB [ECP (VF0404)] [Escherichia coli O157:H7 str. EDL933]
Kluyvera intermedia	HR2	GCA_009650415.1	3547892	3548422	-	yagZ/ecpA	89.97	76.73	vfdb	NP_286010	(yagZ/ecpA) E. coli common pilus structural subunit EcpA [ECP (VF0404)] [Escherichia coli O157:H7 str. EDL933]
Kluyvera intermedia	NCTC 12125	GCA_900635475.1	3315968	3317292	+	aslA	92.72	82.04	vfdb	AAG10151	(aslA) putative arylsulfatase [AslA (VF0238)] [Escherichia coli O18:K1:H7 str. RS218]
Kluyvera intermedia	NCTC 12125	GCA_900635475.1	4619023	4620918	-	chuA	97.28	77.61	vfdb	NP_756170	(chuA) Outer membrane heme/hemoglobin receptor ChuA [Chu (VF0227)] [Escherichia coli CFT073]
Kluyvera intermedia	NCTC 12125	GCA_900635475.1	4617989	4618974	-	chuS	95.24	75	vfdb	NP_756169	(chuS) heme oxygenase ChuS [Chu (VF0227)] [Escherichia coli CFT073]
Kluyvera intermedia	NCTC 12125	GCA_900635475.1	4699629	4700338	-	chuV	88.39	71.91	vfdb	NP_756180	(chuV) ATP-binding hydrophilic protein ChuV [Chu (VF0227)] [Escherichia coli CFT073]
Kluyvera intermedia	NCTC 12125	GCA_900635475.1	51198	52517	-	chuW	98.43	76.72	vfdb	NP_756176	(chuW) Putative oxygen independent coproporphyrinogen III oxidase [Chu (VF0227)] [Escherichia coli CFT073]
Kluyvera intermedia	NCTC 12125	GCA_900635475.1	50712	51185	-	chuX	95.56	76.37	vfdb	NP_756177	(chuX) putative heme-binding protein ChuX [Chu (VF0227)] [Escherichia coli CFT073]
Kluyvera intermedia	NCTC 12125	GCA_900635475.1	50067	50690	-	chuY	99.68	71.72	vfdb	NP_756178	(chuY) ChuY [Chu (VF0227)] [Escherichia coli CFT073]
Kluyvera intermedia	NCTC 12125	GCA_900635475.1	1596429	1597124	-	csgG	82.73	74.64	vfdb	NP_460110	(csgG) curli production assembly/transport protein CsgG [Agf (VF0103)] [Salmonella enterica subsp. enterica serovar Typhimurium str. LT2]
Kluyvera intermedia	NCTC 12125	GCA_900635475.1	2157176	2157919	-	entA	99.6	80.78	vfdb	NP_752614	(entA) 23-dihydro-23-dihydroxybenzoate dehydrogenase [Enterobactin (VF0228)] [Escherichia coli CFT073]
Kluyvera intermedia	NCTC 12125	GCA_900635475.1	2157931	2158785	-	entB	99.53	79.74	vfdb	NP_752613	(entB) isochorismatase [Enterobactin (VF0228)] [Escherichia coli CFT073]
Kluyvera intermedia	NCTC 12125	GCA_900635475.1	2160420	2161611	-	entC	98.74	73.47	vfdb	NP_752611	(entC) isochorismate synthase 1 [Enterobactin (VF0228)] [Escherichia coli CFT073]
Kluyvera intermedia	NCTC 12125	GCA_900635475.1	2158818	2160399	-	entE	98.14	78	vfdb	NP_752612	(entE) 23-dihydroxybenzoate-AMP ligase component of enterobactin synthase multienzyme complex [Enterobactin (VF0228)] [Escherichia coli CFT073]
Kluyvera intermedia	NCTC 12125	GCA_900635475.1	2167788	2171598	-	entF	97.09	72.61	vfdb	NP_752604	(entF) enterobactin synthase multienzyme complex component ATP-dependent [Enterobactin (VF0228)] [Escherichia coli CFT073]
Kluyvera intermedia	NCTC 12125	GCA_900635475.1	2162907	2164120	-	entS	97.04	76.52	vfdb	NP_752609	(entS) enterobactin exporter iron-regulated [enterobactin (IA019)] [Escherichia coli CFT073]
Kluyvera intermedia	NCTC 12125	GCA_900635475.1	2173238	2175511	+	fepA	98.62	75.7	vfdb	NP_752600	(fepA) ferrienterobactin outer membrane transporter [Enterobactin (VF0228)] [Escherichia coli CFT073]
Kluyvera intermedia	NCTC 12125	GCA_900635475.1	2161891	2162787	+	fepB	93.31	78.47	vfdb	NP_752610	(fepB) ferrienterobactin ABC transporter periplasmic binding protein [Enterobactin (VF0228)] [Escherichia coli CFT073]
Kluyvera intermedia	NCTC 12125	GCA_900635475.1	2166225	2167012	+	fepC	96.45	78.2	vfdb	NP_752606	(fepC) ferrienterobactin ABC transporter ATPase [Enterobactin (VF0228)] [Escherichia coli CFT073]
Kluyvera intermedia	NCTC 12125	GCA_900635475.1	2164269	2165239	+	fepD	94.89	76.08	vfdb	NP_752608	(fepD) ferrienterobactin ABC transporter permease [Enterobactin (VF0228)] [Escherichia coli CFT073]
Kluyvera intermedia	NCTC 12125	GCA_900635475.1	2165317	2166228	+	fepG	91.54	78.25	vfdb	NP_752607	(fepG) iron-enterobactin ABC transporter permease [Enterobactin (VF0228)] [Escherichia coli CFT073]
Kluyvera intermedia	NCTC 12125	GCA_900635475.1	2171884	2172961	-	fes	87.7	69.61	vfdb	NP_752602	(fes) enterobactin/ferric enterobactin esterase [enterobactin (IA019)] [Escherichia coli CFT073]
Kluyvera intermedia	NCTC 12125	GCA_900635475.1	4302370	4302898	+	fimA	86.63	74.86	vfdb	NP_757241	(fimA) Type-1 fimbrial protein A chain precursor [Type 1 fimbriae (VF0221)] [Escherichia coli CFT073]
Kluyvera intermedia	NCTC 12125	GCA_900635475.1	4303646	4304243	+	fimC	82.37	77.26	vfdb	NP_757243	(fimC) Chaperone protein fimC precursor [Type 1 fimbriae (VF0221)] [Escherichia coli CFT073]
Kluyvera intermedia	NCTC 12125	GCA_900635475.1	4304473	4306886	+	fimD	91.51	75.03	vfdb	NP_757244	(fimD) Outer membrane usher protein fimD precursor [Type 1 fimbriae (VF0221)] [Escherichia coli CFT073]
Kluyvera intermedia	NCTC 12125	GCA_900635475.1	4307588	4308030	+	fimG	87.9	75.62	vfdb	NP_757247	(fimG) FimG protein precursor [Type 1 fimbriae (VF0221)] [Escherichia coli CFT073]
Kluyvera intermedia	NCTC 12125	GCA_900635475.1	4308080	4308948	+	fimH	95.29	72.84	vfdb	NP_757248	(fimH) FimH protein precursor [Type 1 fimbriae (VF0221)] [Escherichia coli CFT073]
Kluyvera intermedia	NCTC 12125	GCA_900635475.1	4303012	4303498	+	fimI	89.63	71.22	vfdb	NP_757242	(fimI) Fimbrin-like protein fimI precursor [Type 1 fimbriae (VF0221)] [Escherichia coli CFT073]
Kluyvera intermedia	NCTC 12125	GCA_900635475.1	424019	424927	-	gtrB	97.74	70.63	vfdb	NP_706258	(gtrB) bactoprenol glucosyl transferase [LPS (VF0124)] [Shigella flexneri 2a str. 301]
Kluyvera intermedia	NCTC 12125	GCA_900635475.1	2474197	2476404	+	iutA	96.84	78.12	vfdb	NP_755498	(iutA) ferric aerobactin receptor precusor IutA [Aerobactin (VF0229)] [Escherichia coli CFT073]
Kluyvera intermedia	NCTC 12125	GCA_900635475.1	1804231	1805286	+	ompA	100	84.66	vfdb	AAF37887	(ompA) outer membrane protein A [OmpA (VF0236)] [Escherichia coli O18:K1:H7 str. RS218]
Kluyvera intermedia	NCTC 12125	GCA_900635475.1	2472647	2473785	+	senB	99.91	93.24	vfdb	YP_406304	(senB) enterotoxin [ShET2 (VF0258)] [Shigella flexneri 2a str. 301]
Kluyvera intermedia	NCTC 12125	GCA_900635475.1	52559	53381	-	shuT	82.28	72.77	vfdb	YP_405017	(shuT) periplasmic binding protein ShuT [Shu (VF0256)] [Shigella dysenteriae Sd197]
Kluyvera intermedia	NCTC 12125	GCA_900635475.1	4700316	4701091	-	shuU	80.98	74.65	vfdb	YP_405014	(shuU) permease of iron compound ABC transport system [Shu (VF0256)] [Shigella dysenteriae Sd197]
Kluyvera intermedia	NCTC 12125	GCA_900635475.1	183831	185813	+	sinH	90.38	75.61	vfdb	NP_461452	(sinH) intimin-like protein [SinH (VF0400)] [Salmonella enterica subsp. enterica serovar Typhimurium str. LT2]
Kluyvera intermedia	NCTC 12125	GCA_900635475.1	2384652	2385288	-	yagV/ecpE	82.8	68.34	vfdb	NP_286006	(yagV/ecpE) E. coli common pilus chaperone EcpE [ECP (VF0404)] [Escherichia coli O157:H7 str. EDL933]
Kluyvera intermedia	NCTC 12125	GCA_900635475.1	2385223	2386809	-	yagW/ecpD	96.47	72.06	vfdb	NP_286007	(yagW/ecpD) polymerized tip adhesin of ECP fibers [ECP (VF0404)] [Escherichia coli O157:H7 str. EDL933]
Kluyvera intermedia	NCTC 12125	GCA_900635475.1	2386908	2389322	-	yagX/ecpC	95.29	73.94	vfdb	NP_286008	(yagX/ecpC) E. coli common pilus usher EcpC [ECP (VF0404)] [Escherichia coli O157:H7 str. EDL933]
Kluyvera intermedia	NCTC 12125	GCA_900635475.1	2389407	2390075	-	yagY/ecpB	99.55	71.58	vfdb	NP_286009	(yagY/ecpB) E. coli common pilus chaperone EcpB [ECP (VF0404)] [Escherichia coli O157:H7 str. EDL933]
Kluyvera intermedia	NCTC 12125	GCA_900635475.1	2390136	2390666	-	yagZ/ecpA	89.97	76.73	vfdb	NP_286010	(yagZ/ecpA) E. coli common pilus structural subunit EcpA [ECP (VF0404)] [Escherichia coli O157:H7 str. EDL933]
Kluyvera sichuanensis	090646	JABBJF000000000	116716	117647	-	chuS	88.63	67.01	vfdb	NP_756169	(chuS) heme oxygenase ChuS [Chu (VF0227)] [Escherichia coli CFT073]
Kluyvera sichuanensis	090646	JABBJF000000000	32516	33498	-	chuU	98.49	74.19	vfdb	NP_756179	(chuU) heme permease protein ChuU [Chu (VF0227)] [Escherichia coli CFT073]
Kluyvera sichuanensis	090646	JABBJF000000000	114902	115747	-	chuU	83.18	65.13	vfdb	NP_756179	(chuU) heme permease protein ChuU [Chu (VF0227)] [Escherichia coli CFT073]
Kluyvera sichuanensis	090646	JABBJF000000000	34679	35999	-	chuW	98.58	76.57	vfdb	NP_756176	(chuW) Putative oxygen independent coproporphyrinogen III oxidase [Chu (VF0227)] [Escherichia coli CFT073]
Kluyvera sichuanensis	090646	JABBJF000000000	34194	34666	-	chuX	95.56	79.28	vfdb	NP_756177	(chuX) putative heme-binding protein ChuX [Chu (VF0227)] [Escherichia coli CFT073]
Kluyvera sichuanensis	090646	JABBJF000000000	33551	34172	-	chuY	99.04	72.05	vfdb	NP_756178	(chuY) ChuY [Chu (VF0227)] [Escherichia coli CFT073]
Kluyvera sichuanensis	090646	JABBJF000000000	11134	11817	+	csgG	82.01	76.61	vfdb	NP_460110	(csgG) curli production assembly/transport protein CsgG [Agf (VF0103)] [Salmonella enterica subsp. enterica serovar Typhimurium str. LT2]
Kluyvera sichuanensis	090646	JABBJF000000000	56805	57547	+	entA	99.46	79.27	vfdb	NP_752614	(entA) 23-dihydro-23-dihydroxybenzoate dehydrogenase [Enterobactin (VF0228)] [Escherichia coli CFT073]
Kluyvera sichuanensis	090646	JABBJF000000000	55939	56793	+	entB	99.65	80.77	vfdb	NP_752613	(entB) isochorismatase [Enterobactin (VF0228)] [Escherichia coli CFT073]
Kluyvera sichuanensis	090646	JABBJF000000000	53113	54305	+	entC	98.74	74.48	vfdb	NP_752611	(entC) isochorismate synthase 1 [Enterobactin (VF0228)] [Escherichia coli CFT073]
Kluyvera sichuanensis	090646	JABBJF000000000	54326	55907	+	entE	98.2	77.18	vfdb	NP_752612	(entE) 23-dihydroxybenzoate-AMP ligase component of enterobactin synthase multienzyme complex [Enterobactin (VF0228)] [Escherichia coli CFT073]
Kluyvera sichuanensis	090646	JABBJF000000000	43796	47605	+	entF	96.93	72.44	vfdb	NP_752604	(entF) enterobactin synthase multienzyme complex component ATP-dependent [Enterobactin (VF0228)] [Escherichia coli CFT073]
Kluyvera sichuanensis	090646	JABBJF000000000	50624	51837	+	entS	97.04	78.34	vfdb	NP_752609	(entS) enterobactin exporter iron-regulated [enterobactin (IA019)] [Escherichia coli CFT073]
Kluyvera sichuanensis	090646	JABBJF000000000	39870	42155	-	fepA	98.84	76.17	vfdb	NP_752600	(fepA) ferrienterobactin outer membrane transporter [Enterobactin (VF0228)] [Escherichia coli CFT073]
Kluyvera sichuanensis	090646	JABBJF000000000	51937	52838	-	fepB	94.25	76.83	vfdb	NP_752610	(fepB) ferrienterobactin ABC transporter periplasmic binding protein [Enterobactin (VF0228)] [Escherichia coli CFT073]
Kluyvera sichuanensis	090646	JABBJF000000000	47733	48520	-	fepC	96.45	77.31	vfdb	NP_752606	(fepC) ferrienterobactin ABC transporter ATPase [Enterobactin (VF0228)] [Escherichia coli CFT073]
Kluyvera sichuanensis	090646	JABBJF000000000	49506	50489	-	fepD	96.36	77.97	vfdb	NP_752608	(fepD) ferrienterobactin ABC transporter permease [Enterobactin (VF0228)] [Escherichia coli CFT073]
Kluyvera sichuanensis	090646	JABBJF000000000	48517	49428	-	fepG	91.64	79.21	vfdb	NP_752607	(fepG) iron-enterobactin ABC transporter permease [Enterobactin (VF0228)] [Escherichia coli CFT073]
Kluyvera sichuanensis	090646	JABBJF000000000	42359	43510	+	fes	93.27	69.66	vfdb	NP_752602	(fes) enterobactin/ferric enterobactin esterase [enterobactin (IA019)] [Escherichia coli CFT073]
Kluyvera sichuanensis	090646	JABBJF000000000	39093	39697	-	fimC	83.06	73.64	vfdb	NP_757243	(fimC) Chaperone protein fimC precursor [Type 1 fimbriae (VF0221)] [Escherichia coli CFT073]
Kluyvera sichuanensis	090646	JABBJF000000000	36462	38890	-	fimD	91.96	73.55	vfdb	NP_757244	(fimD) Outer membrane usher protein fimD precursor [Type 1 fimbriae (VF0221)] [Escherichia coli CFT073]
Kluyvera sichuanensis	090646	JABBJF000000000	35857	36375	-	fimF	97.19	68.79	vfdb	NP_757245	(fimF) FimF protein precursor [Type 1 fimbriae (VF0221)] [Escherichia coli CFT073]
Kluyvera sichuanensis	090646	JABBJF000000000	35341	35779	-	fimG	87.1	72.21	vfdb	NP_757247	(fimG) FimG protein precursor [Type 1 fimbriae (VF0221)] [Escherichia coli CFT073]
Kluyvera sichuanensis	090646	JABBJF000000000	34421	35291	-	fimH	95.5	75.55	vfdb	NP_757248	(fimH) FimH protein precursor [Type 1 fimbriae (VF0221)] [Escherichia coli CFT073]
Kluyvera sichuanensis	090646	JABBJF000000000	244308	246526	+	iutA	96.89	78.2	vfdb	NP_755498	(iutA) ferric aerobactin receptor precusor IutA [Aerobactin (VF0229)] [Escherichia coli CFT073]
Kluyvera sichuanensis	090646	JABBJF000000000	97271	98752	-	kpsD	88.19	72.12	vfdb	AAA21682	(kpsD) KpsD [K1 capsule (VF0239)] [Escherichia coli O18:K1:H7 str. RS218]
Kluyvera sichuanensis	090646	JABBJF000000000	87573	88303	+	kpsM	93.18	69.65	vfdb	AAA24046	(kpsM) KpsM [K1 capsule (VF0239)] [Escherichia coli O18:K1:H7 str. RS218]
Kluyvera sichuanensis	090646	JABBJF000000000	88309	88882	+	kpsT	85.91	70.91	vfdb	AAA24047	(kpsT) KpsT [K1 capsule (VF0239)] [Escherichia coli O18:K1:H7 str. RS218]
Kluyvera sichuanensis	090646	JABBJF000000000	198672	199727	+	ompA	100	83.9	vfdb	AAF37887	(ompA) outer membrane protein A [OmpA (VF0236)] [Escherichia coli O18:K1:H7 str. RS218]
Kluyvera sichuanensis	090646	JABBJF000000000	31829	32500	-	shuV	86.64	70.12	vfdb	YP_405013	(shuV) ATP-binding component of hemin transport system [Shu (VF0256)] [Shigella dysenteriae Sd197]
Kluyvera genomosp. 1	L2	GCA_001266615.1	16870	18172	+	aslA	91.18	79.66	vfdb	AAG10151	(aslA) putative arylsulfatase [AslA (VF0238)] [Escherichia coli O18:K1:H7 str. RS218]
Kluyvera genomosp. 1	L2	GCA_001266615.1	312575	314470	-	chuA	97.38	76.9	vfdb	NP_756170	(chuA) Outer membrane heme/hemoglobin receptor ChuA [Chu (VF0227)] [Escherichia coli CFT073]
Kluyvera genomosp. 1	L2	GCA_001266615.1	311541	312526	-	chuS	95.53	75.63	vfdb	NP_756169	(chuS) heme oxygenase ChuS [Chu (VF0227)] [Escherichia coli CFT073]
Kluyvera genomosp. 1	L2	GCA_001266615.1	28073	29055	-	chuU	98.79	76.24	vfdb	NP_756179	(chuU) heme permease protein ChuU [Chu (VF0227)] [Escherichia coli CFT073]
Kluyvera genomosp. 1	L2	GCA_001266615.1	27393	28095	-	chuV	87.64	72.87	vfdb	NP_756180	(chuV) ATP-binding hydrophilic protein ChuV [Chu (VF0227)] [Escherichia coli CFT073]
Kluyvera genomosp. 1	L2	GCA_001266615.1	30239	31558	-	chuW	98.51	76.93	vfdb	NP_756176	(chuW) Putative oxygen independent coproporphyrinogen III oxidase [Chu (VF0227)] [Escherichia coli CFT073]
Kluyvera genomosp. 1	L2	GCA_001266615.1	29754	30226	-	chuX	95.56	75.48	vfdb	NP_756177	(chuX) putative heme-binding protein ChuX [Chu (VF0227)] [Escherichia coli CFT073]
Kluyvera genomosp. 1	L2	GCA_001266615.1	29113	29732	-	chuY	98.88	73.03	vfdb	NP_756178	(chuY) ChuY [Chu (VF0227)] [Escherichia coli CFT073]
Kluyvera genomosp. 1	L2	GCA_001266615.1	253519	254191	-	csgG	80.7	75.78	vfdb	NP_460110	(csgG) curli production assembly/transport protein CsgG [Agf (VF0103)] [Salmonella enterica subsp. enterica serovar Typhimurium str. LT2]
Kluyvera genomosp. 1	L2	GCA_001266615.1	19808	20553	+	entA	99.73	79.25	vfdb	NP_752614	(entA) 23-dihydro-23-dihydroxybenzoate dehydrogenase [Enterobactin (VF0228)] [Escherichia coli CFT073]
Kluyvera genomosp. 1	L2	GCA_001266615.1	18944	19798	+	entB	99.53	80.21	vfdb	NP_752613	(entB) isochorismatase [Enterobactin (VF0228)] [Escherichia coli CFT073]
Kluyvera genomosp. 1	L2	GCA_001266615.1	16113	17304	+	entC	98.4	73.04	vfdb	NP_752611	(entC) isochorismate synthase 1 [Enterobactin (VF0228)] [Escherichia coli CFT073]
Kluyvera genomosp. 1	L2	GCA_001266615.1	17332	18912	+	entE	97.52	77.12	vfdb	NP_752612	(entE) 23-dihydroxybenzoate-AMP ligase component of enterobactin synthase multienzyme complex [Enterobactin (VF0228)] [Escherichia coli CFT073]
Kluyvera genomosp. 1	L2	GCA_001266615.1	6678	10487	+	entF	97.45	72.53	vfdb	NP_752604	(entF) enterobactin synthase multienzyme complex component ATP-dependent [Enterobactin (VF0228)] [Escherichia coli CFT073]
Kluyvera genomosp. 1	L2	GCA_001266615.1	13627	14837	+	entS	96.64	76.5	vfdb	NP_752609	(entS) enterobactin exporter iron-regulated [enterobactin (IA019)] [Escherichia coli CFT073]
Kluyvera genomosp. 1	L2	GCA_001266615.1	2644	4809	-	fepA	94.42	76.6	vfdb	NP_752600	(fepA) ferrienterobactin outer membrane transporter [Enterobactin (VF0228)] [Escherichia coli CFT073]
Kluyvera genomosp. 1	L2	GCA_001266615.1	14971	15850	-	fepB	91.85	79.23	vfdb	NP_752610	(fepB) ferrienterobactin ABC transporter periplasmic binding protein [Enterobactin (VF0228)] [Escherichia coli CFT073]
Kluyvera genomosp. 1	L2	GCA_001266615.1	10737	11524	-	fepC	96.45	77.57	vfdb	NP_752606	(fepC) ferrienterobactin ABC transporter ATPase [Enterobactin (VF0228)] [Escherichia coli CFT073]
Kluyvera genomosp. 1	L2	GCA_001266615.1	12532	13501	-	fepD	95.38	75.36	vfdb	NP_752608	(fepD) ferrienterobactin ABC transporter permease [Enterobactin (VF0228)] [Escherichia coli CFT073]
Kluyvera genomosp. 1	L2	GCA_001266615.1	11521	12501	-	fepG	98.19	77.2	vfdb	NP_752607	(fepG) iron-enterobactin ABC transporter permease [Enterobactin (VF0228)] [Escherichia coli CFT073]
Kluyvera genomosp. 1	L2	GCA_001266615.1	18092	18612	+	fimA	85.31	72.41	vfdb	NP_757241	(fimA) Type-1 fimbrial protein A chain precursor [Type 1 fimbriae (VF0221)] [Escherichia coli CFT073]
Kluyvera genomosp. 1	L2	GCA_001266615.1	19359	19961	+	fimC	83.06	75.95	vfdb	NP_757243	(fimC) Chaperone protein fimC precursor [Type 1 fimbriae (VF0221)] [Escherichia coli CFT073]
Kluyvera genomosp. 1	L2	GCA_001266615.1	20187	22600	+	fimD	91.54	74.48	vfdb	NP_757244	(fimD) Outer membrane usher protein fimD precursor [Type 1 fimbriae (VF0221)] [Escherichia coli CFT073]
Kluyvera genomosp. 1	L2	GCA_001266615.1	22768	23229	+	fimF	86.14	70.47	vfdb	NP_757245	(fimF) FimF protein precursor [Type 1 fimbriae (VF0221)] [Escherichia coli CFT073]
Kluyvera genomosp. 1	L2	GCA_001266615.1	23304	23745	+	fimG	87.7	73.98	vfdb	NP_757247	(fimG) FimG protein precursor [Type 1 fimbriae (VF0221)] [Escherichia coli CFT073]
Kluyvera genomosp. 1	L2	GCA_001266615.1	23793	24663	+	fimH	95.5	75.2	vfdb	NP_757248	(fimH) FimH protein precursor [Type 1 fimbriae (VF0221)] [Escherichia coli CFT073]
Kluyvera genomosp. 1	L2	GCA_001266615.1	18720	19227	+	fimI	93.89	70.14	vfdb	NP_757242	(fimI) Fimbrin-like protein fimI precursor [Type 1 fimbriae (VF0221)] [Escherichia coli CFT073]
Kluyvera genomosp. 1	L2	GCA_001266615.1	9223	11430	+	iutA	96.75	79.14	vfdb	NP_755498	(iutA) ferric aerobactin receptor precusor IutA [Aerobactin (VF0229)] [Escherichia coli CFT073]
Kluyvera genomosp. 1	L2	GCA_001266615.1	186724	188198	+	kpsD	87.95	71.66	vfdb	AAA21682	(kpsD) KpsD [K1 capsule (VF0239)] [Escherichia coli O18:K1:H7 str. RS218]
Kluyvera genomosp. 1	L2	GCA_001266615.1	198613	199389	-	kpsM	100	64.35	vfdb	AAA24046	(kpsM) KpsM [K1 capsule (VF0239)] [Escherichia coli O18:K1:H7 str. RS218]
Kluyvera genomosp. 1	L2	GCA_001266615.1	198071	198616	-	kpsT	81.82	70.65	vfdb	AAA24047	(kpsT) KpsT [K1 capsule (VF0239)] [Escherichia coli O18:K1:H7 str. RS218]
Kluyvera genomosp. 1	L2	GCA_001266615.1	70407	71462	-	ompA	100	84.38	vfdb	AAF37887	(ompA) outer membrane protein A [OmpA (VF0236)] [Escherichia coli O18:K1:H7 str. RS218]
Kluyvera genomosp. 2	KA2	GCA_003023805.1	14324	15249	-	chuS	89.21	67.23	vfdb	NP_756169	(chuS) heme oxygenase ChuS [Chu (VF0227)] [Escherichia coli CFT073]
Kluyvera genomosp. 2	KA2	GCA_003023805.1	95229	96211	-	chuU	98.79	73.5	vfdb	NP_756179	(chuU) heme permease protein ChuU [Chu (VF0227)] [Escherichia coli CFT073]
Kluyvera genomosp. 2	KA2	GCA_003023805.1	94531	95251	-	chuV	89.89	71.47	vfdb	NP_756180	(chuV) ATP-binding hydrophilic protein ChuV [Chu (VF0227)] [Escherichia coli CFT073]
Kluyvera genomosp. 2	KA2	GCA_003023805.1	97393	98712	-	chuW	98.58	76.68	vfdb	NP_756176	(chuW) Putative oxygen independent coproporphyrinogen III oxidase [Chu (VF0227)] [Escherichia coli CFT073]
Kluyvera genomosp. 2	KA2	GCA_003023805.1	96908	97380	-	chuX	95.56	76.11	vfdb	NP_756177	(chuX) putative heme-binding protein ChuX [Chu (VF0227)] [Escherichia coli CFT073]
Kluyvera genomosp. 2	KA2	GCA_003023805.1	96267	96886	-	chuY	98.72	71.64	vfdb	NP_756178	(chuY) ChuY [Chu (VF0227)] [Escherichia coli CFT073]
Kluyvera genomosp. 2	KA2	GCA_003023805.1	162083	162792	+	csgG	84.65	76.61	vfdb	NP_460110	(csgG) curli production assembly/transport protein CsgG [Agf (VF0103)] [Salmonella enterica subsp. enterica serovar Typhimurium str. LT2]
Kluyvera genomosp. 2	KA2	GCA_003023805.1	342649	343392	-	entA	99.46	78.93	vfdb	NP_752614	(entA) 23-dihydro-23-dihydroxybenzoate dehydrogenase [Enterobactin (VF0228)] [Escherichia coli CFT073]
Kluyvera genomosp. 2	KA2	GCA_003023805.1	343406	344258	-	entB	99.3	78.65	vfdb	NP_752613	(entB) isochorismatase [Enterobactin (VF0228)] [Escherichia coli CFT073]
Kluyvera genomosp. 2	KA2	GCA_003023805.1	345838	347030	-	entC	99.24	73.52	vfdb	NP_752611	(entC) isochorismate synthase 1 [Enterobactin (VF0228)] [Escherichia coli CFT073]
Kluyvera genomosp. 2	KA2	GCA_003023805.1	344291	345817	-	entE	94.72	75.85	vfdb	NP_752612	(entE) 23-dihydroxybenzoate-AMP ligase component of enterobactin synthase multienzyme complex [Enterobactin (VF0228)] [Escherichia coli CFT073]
Kluyvera genomosp. 2	KA2	GCA_003023805.1	352550	356348	-	entF	96.78	72.51	vfdb	NP_752604	(entF) enterobactin synthase multienzyme complex component ATP-dependent [Enterobactin (VF0228)] [Escherichia coli CFT073]
Kluyvera genomosp. 2	KA2	GCA_003023805.1	348263	349476	-	entS	97.04	77.18	vfdb	NP_752609	(entS) enterobactin exporter iron-regulated [enterobactin (IA019)] [Escherichia coli CFT073]
Kluyvera genomosp. 2	KA2	GCA_003023805.1	358110	360223	+	fepA	93.49	78.43	vfdb	NP_752600	(fepA) ferrienterobactin outer membrane transporter [Enterobactin (VF0228)] [Escherichia coli CFT073]
Kluyvera genomosp. 2	KA2	GCA_003023805.1	347305	348186	+	fepB	92.16	78.46	vfdb	NP_752610	(fepB) ferrienterobactin ABC transporter periplasmic binding protein [Enterobactin (VF0228)] [Escherichia coli CFT073]
Kluyvera genomosp. 2	KA2	GCA_003023805.1	351580	352367	+	fepC	96.57	76.78	vfdb	NP_752606	(fepC) ferrienterobactin ABC transporter ATPase [Enterobactin (VF0228)] [Escherichia coli CFT073]
Kluyvera genomosp. 2	KA2	GCA_003023805.1	349699	350587	+	fepD	87.12	77.28	vfdb	NP_752608	(fepD) ferrienterobactin ABC transporter permease [Enterobactin (VF0228)] [Escherichia coli CFT073]
Kluyvera genomosp. 2	KA2	GCA_003023805.1	350677	351583	+	fepG	91.34	78.06	vfdb	NP_752607	(fepG) iron-enterobactin ABC transporter permease [Enterobactin (VF0228)] [Escherichia coli CFT073]
Kluyvera genomosp. 2	KA2	GCA_003023805.1	356614	357784	-	fes	95.18	71.22	vfdb	NP_752602	(fes) enterobactin/ferric enterobactin esterase [enterobactin (IA019)] [Escherichia coli CFT073]
Kluyvera genomosp. 2	KA2	GCA_003023805.1	88253	88764	+	fimA	83.17	73.31	vfdb	NP_757241	(fimA) Type-1 fimbrial protein A chain precursor [Type 1 fimbriae (VF0221)] [Escherichia coli CFT073]
Kluyvera genomosp. 2	KA2	GCA_003023805.1	89520	90100	+	fimC	80.03	74.87	vfdb	NP_757243	(fimC) Chaperone protein fimC precursor [Type 1 fimbriae (VF0221)] [Escherichia coli CFT073]
Kluyvera genomosp. 2	KA2	GCA_003023805.1	90331	92835	+	fimD	94.92	73.63	vfdb	NP_757244	(fimD) Outer membrane usher protein fimD precursor [Type 1 fimbriae (VF0221)] [Escherichia coli CFT073]
Kluyvera genomosp. 2	KA2	GCA_003023805.1	92898	93373	+	fimF	87.83	69.77	vfdb	NP_757245	(fimF) FimF protein precursor [Type 1 fimbriae (VF0221)] [Escherichia coli CFT073]
Kluyvera genomosp. 2	KA2	GCA_003023805.1	93451	93889	+	fimG	87.1	76.77	vfdb	NP_757247	(fimG) FimG protein precursor [Type 1 fimbriae (VF0221)] [Escherichia coli CFT073]
Kluyvera genomosp. 2	KA2	GCA_003023805.1	93903	94810	+	fimH	99.23	75.99	vfdb	NP_757248	(fimH) FimH protein precursor [Type 1 fimbriae (VF0221)] [Escherichia coli CFT073]
Kluyvera genomosp. 2	KA2	GCA_003023805.1	88891	89379	+	fimI	90.56	68.51	vfdb	NP_757242	(fimI) Fimbrin-like protein fimI precursor [Type 1 fimbriae (VF0221)] [Escherichia coli CFT073]
Kluyvera genomosp. 2	KA2	GCA_003023805.1	6359	8568	+	iutA	96.58	76.96	vfdb	NP_755498	(iutA) ferric aerobactin receptor precusor IutA [Aerobactin (VF0229)] [Escherichia coli CFT073]
Kluyvera genomosp. 2	KA2	GCA_003023805.1	47409	48935	-	kpsD	90.28	72.47	vfdb	AAA21682	(kpsD) KpsD [K1 capsule (VF0239)] [Escherichia coli O18:K1:H7 str. RS218]
Kluyvera genomosp. 2	KA2	GCA_003023805.1	38019	38596	+	kpsT	86.82	70.5	vfdb	AAA24047	(kpsT) KpsT [K1 capsule (VF0239)] [Escherichia coli O18:K1:H7 str. RS218]
Kluyvera genomosp. 2	KA2	GCA_003023805.1	66329	67384	+	ompA	100	85.13	vfdb	AAF37887	(ompA) outer membrane protein A [OmpA (VF0236)] [Escherichia coli O18:K1:H7 str. RS218]
Kluyvera genomosp. 2	KA2	GCA_003023805.1	98761	99556	-	shuT	80.06	72.4	vfdb	YP_405017	(shuT) periplasmic binding protein ShuT [Shu (VF0256)] [Shigella dysenteriae Sd197]
Kluyvera genomosp. 2	MGYG-HGUT-02491	GCA_902387575.1	14324	15249	-	chuS	89.21	67.23	vfdb	NP_756169	(chuS) heme oxygenase ChuS [Chu (VF0227)] [Escherichia coli CFT073]
Kluyvera genomosp. 2	MGYG-HGUT-02491	GCA_902387575.1	95229	96211	-	chuU	98.79	73.5	vfdb	NP_756179	(chuU) heme permease protein ChuU [Chu (VF0227)] [Escherichia coli CFT073]
Kluyvera genomosp. 2	MGYG-HGUT-02491	GCA_902387575.1	94531	95251	-	chuV	89.89	71.47	vfdb	NP_756180	(chuV) ATP-binding hydrophilic protein ChuV [Chu (VF0227)] [Escherichia coli CFT073]
Kluyvera genomosp. 2	MGYG-HGUT-02491	GCA_902387575.1	97393	98712	-	chuW	98.58	76.68	vfdb	NP_756176	(chuW) Putative oxygen independent coproporphyrinogen III oxidase [Chu (VF0227)] [Escherichia coli CFT073]
Kluyvera genomosp. 2	MGYG-HGUT-02491	GCA_902387575.1	96908	97380	-	chuX	95.56	76.11	vfdb	NP_756177	(chuX) putative heme-binding protein ChuX [Chu (VF0227)] [Escherichia coli CFT073]
Kluyvera genomosp. 2	MGYG-HGUT-02491	GCA_902387575.1	96267	96886	-	chuY	98.72	71.64	vfdb	NP_756178	(chuY) ChuY [Chu (VF0227)] [Escherichia coli CFT073]
Kluyvera genomosp. 2	MGYG-HGUT-02491	GCA_902387575.1	162083	162792	+	csgG	84.65	76.61	vfdb	NP_460110	(csgG) curli production assembly/transport protein CsgG [Agf (VF0103)] [Salmonella enterica subsp. enterica serovar Typhimurium str. LT2]
Kluyvera genomosp. 2	MGYG-HGUT-02491	GCA_902387575.1	342649	343392	-	entA	99.46	78.93	vfdb	NP_752614	(entA) 23-dihydro-23-dihydroxybenzoate dehydrogenase [Enterobactin (VF0228)] [Escherichia coli CFT073]
Kluyvera genomosp. 2	MGYG-HGUT-02491	GCA_902387575.1	343406	344258	-	entB	99.3	78.65	vfdb	NP_752613	(entB) isochorismatase [Enterobactin (VF0228)] [Escherichia coli CFT073]
Kluyvera genomosp. 2	MGYG-HGUT-02491	GCA_902387575.1	345838	347030	-	entC	99.24	73.52	vfdb	NP_752611	(entC) isochorismate synthase 1 [Enterobactin (VF0228)] [Escherichia coli CFT073]
Kluyvera genomosp. 2	MGYG-HGUT-02491	GCA_902387575.1	344291	345817	-	entE	94.72	75.85	vfdb	NP_752612	(entE) 23-dihydroxybenzoate-AMP ligase component of enterobactin synthase multienzyme complex [Enterobactin (VF0228)] [Escherichia coli CFT073]
Kluyvera genomosp. 2	MGYG-HGUT-02491	GCA_902387575.1	352550	356348	-	entF	96.78	72.51	vfdb	NP_752604	(entF) enterobactin synthase multienzyme complex component ATP-dependent [Enterobactin (VF0228)] [Escherichia coli CFT073]
Kluyvera genomosp. 2	MGYG-HGUT-02491	GCA_902387575.1	348263	349476	-	entS	97.04	77.18	vfdb	NP_752609	(entS) enterobactin exporter iron-regulated [enterobactin (IA019)] [Escherichia coli CFT073]
Kluyvera genomosp. 2	MGYG-HGUT-02491	GCA_902387575.1	358110	360223	+	fepA	93.49	78.43	vfdb	NP_752600	(fepA) ferrienterobactin outer membrane transporter [Enterobactin (VF0228)] [Escherichia coli CFT073]
Kluyvera genomosp. 2	MGYG-HGUT-02491	GCA_902387575.1	347305	348186	+	fepB	92.16	78.46	vfdb	NP_752610	(fepB) ferrienterobactin ABC transporter periplasmic binding protein [Enterobactin (VF0228)] [Escherichia coli CFT073]
Kluyvera genomosp. 2	MGYG-HGUT-02491	GCA_902387575.1	351580	352367	+	fepC	96.57	76.78	vfdb	NP_752606	(fepC) ferrienterobactin ABC transporter ATPase [Enterobactin (VF0228)] [Escherichia coli CFT073]
Kluyvera genomosp. 2	MGYG-HGUT-02491	GCA_902387575.1	349699	350587	+	fepD	87.12	77.28	vfdb	NP_752608	(fepD) ferrienterobactin ABC transporter permease [Enterobactin (VF0228)] [Escherichia coli CFT073]
Kluyvera genomosp. 2	MGYG-HGUT-02491	GCA_902387575.1	350677	351583	+	fepG	91.34	78.06	vfdb	NP_752607	(fepG) iron-enterobactin ABC transporter permease [Enterobactin (VF0228)] [Escherichia coli CFT073]
Kluyvera genomosp. 2	MGYG-HGUT-02491	GCA_902387575.1	356614	357784	-	fes	95.18	71.22	vfdb	NP_752602	(fes) enterobactin/ferric enterobactin esterase [enterobactin (IA019)] [Escherichia coli CFT073]
Kluyvera genomosp. 2	MGYG-HGUT-02491	GCA_902387575.1	88253	88764	+	fimA	83.17	73.31	vfdb	NP_757241	(fimA) Type-1 fimbrial protein A chain precursor [Type 1 fimbriae (VF0221)] [Escherichia coli CFT073]
Kluyvera genomosp. 2	MGYG-HGUT-02491	GCA_902387575.1	89520	90100	+	fimC	80.03	74.87	vfdb	NP_757243	(fimC) Chaperone protein fimC precursor [Type 1 fimbriae (VF0221)] [Escherichia coli CFT073]
Kluyvera genomosp. 2	MGYG-HGUT-02491	GCA_902387575.1	90331	92835	+	fimD	94.92	73.63	vfdb	NP_757244	(fimD) Outer membrane usher protein fimD precursor [Type 1 fimbriae (VF0221)] [Escherichia coli CFT073]
Kluyvera genomosp. 2	MGYG-HGUT-02491	GCA_902387575.1	92898	93373	+	fimF	87.83	69.77	vfdb	NP_757245	(fimF) FimF protein precursor [Type 1 fimbriae (VF0221)] [Escherichia coli CFT073]
Kluyvera genomosp. 2	MGYG-HGUT-02491	GCA_902387575.1	93451	93889	+	fimG	87.1	76.77	vfdb	NP_757247	(fimG) FimG protein precursor [Type 1 fimbriae (VF0221)] [Escherichia coli CFT073]
Kluyvera genomosp. 2	MGYG-HGUT-02491	GCA_902387575.1	93903	94810	+	fimH	99.23	75.99	vfdb	NP_757248	(fimH) FimH protein precursor [Type 1 fimbriae (VF0221)] [Escherichia coli CFT073]
Kluyvera genomosp. 2	MGYG-HGUT-02491	GCA_902387575.1	88891	89379	+	fimI	90.56	68.51	vfdb	NP_757242	(fimI) Fimbrin-like protein fimI precursor [Type 1 fimbriae (VF0221)] [Escherichia coli CFT073]
Kluyvera genomosp. 2	MGYG-HGUT-02491	GCA_902387575.1	6359	8568	+	iutA	96.58	76.96	vfdb	NP_755498	(iutA) ferric aerobactin receptor precusor IutA [Aerobactin (VF0229)] [Escherichia coli CFT073]
Kluyvera genomosp. 2	MGYG-HGUT-02491	GCA_902387575.1	47409	48935	-	kpsD	90.28	72.47	vfdb	AAA21682	(kpsD) KpsD [K1 capsule (VF0239)] [Escherichia coli O18:K1:H7 str. RS218]
Kluyvera genomosp. 2	MGYG-HGUT-02491	GCA_902387575.1	38019	38596	+	kpsT	86.82	70.5	vfdb	AAA24047	(kpsT) KpsT [K1 capsule (VF0239)] [Escherichia coli O18:K1:H7 str. RS218]
Kluyvera genomosp. 2	MGYG-HGUT-02491	GCA_902387575.1	66329	67384	+	ompA	100	85.13	vfdb	AAF37887	(ompA) outer membrane protein A [OmpA (VF0236)] [Escherichia coli O18:K1:H7 str. RS218]
Kluyvera genomosp. 2	MGYG-HGUT-02491	GCA_902387575.1	98761	99556	-	shuT	80.06	72.4	vfdb	YP_405017	(shuT) periplasmic binding protein ShuT [Shu (VF0256)] [Shigella dysenteriae Sd197]
Kluyvera genomosp. 3	missing	ERR3712946	50851	52167	-	aslA	92.16	81.02	vfdb	AAG10151	(aslA) putative arylsulfatase [AslA (VF0238)] [Escherichia coli O18:K1:H7 str. RS218]
Kluyvera genomosp. 3	missing	ERR3712946	14494	14608	-	astA	98.29	91.3	vfdb	BAA94855	(astA) heat-stable enterotoxin 1 [EAST1 (VF0216)] [Escherichia coli O44:H18 042]
Kluyvera genomosp. 3	missing	ERR3712946	8238	9151	-	chuS	87.76	66.92	vfdb	NP_756169	(chuS) heme oxygenase ChuS [Chu (VF0227)] [Escherichia coli CFT073]
Kluyvera genomosp. 3	missing	ERR3712946	6431	7251	-	chuU	81.37	65.71	vfdb	NP_756179	(chuU) heme permease protein ChuU [Chu (VF0227)] [Escherichia coli CFT073]
Kluyvera genomosp. 3	missing	ERR3712946	96393	97145	+	csgG	89.81	75.03	vfdb	NP_460110	(csgG) curli production assembly/transport protein CsgG [Agf (VF0103)] [Salmonella enterica subsp. enterica serovar Typhimurium str. LT2]
Kluyvera genomosp. 3	missing	ERR3712946	6869	7593	-	entA	96.92	78.79	vfdb	NP_752614	(entA) 23-dihydro-23-dihydroxybenzoate dehydrogenase [Enterobactin (VF0228)] [Escherichia coli CFT073]
Kluyvera genomosp. 3	missing	ERR3712946	7623	8477	-	entB	99.53	78.81	vfdb	NP_752613	(entB) isochorismatase [Enterobactin (VF0228)] [Escherichia coli CFT073]
Kluyvera genomosp. 3	missing	ERR3712946	10111	11303	-	entC	98.57	74.94	vfdb	NP_752611	(entC) isochorismate synthase 1 [Enterobactin (VF0228)] [Escherichia coli CFT073]
Kluyvera genomosp. 3	missing	ERR3712946	8510	10090	-	entE	97.77	77.38	vfdb	NP_752612	(entE) 23-dihydroxybenzoate-AMP ligase component of enterobactin synthase multienzyme complex [Enterobactin (VF0228)] [Escherichia coli CFT073]
Kluyvera genomosp. 3	missing	ERR3712946	19236	22951	-	entF	94.59	72.01	vfdb	NP_752604	(entF) enterobactin synthase multienzyme complex component ATP-dependent [Enterobactin (VF0228)] [Escherichia coli CFT073]
Kluyvera genomosp. 3	missing	ERR3712946	14872	16050	-	entS	94.24	77.44	vfdb	NP_752609	(entS) enterobactin exporter iron-regulated [enterobactin (IA019)] [Escherichia coli CFT073]
Kluyvera genomosp. 3	missing	ERR3712946	24689	26808	+	fepA	94.38	78.58	vfdb	NP_752600	(fepA) ferrienterobactin outer membrane transporter [Enterobactin (VF0228)] [Escherichia coli CFT073]
Kluyvera genomosp. 3	missing	ERR3712946	11579	12480	+	fepB	94.15	77.3	vfdb	NP_752610	(fepB) ferrienterobactin ABC transporter periplasmic binding protein [Enterobactin (VF0228)] [Escherichia coli CFT073]
Kluyvera genomosp. 3	missing	ERR3712946	18155	18942	+	fepC	96.45	77.44	vfdb	NP_752606	(fepC) ferrienterobactin ABC transporter ATPase [Enterobactin (VF0228)] [Escherichia coli CFT073]
Kluyvera genomosp. 3	missing	ERR3712946	16186	17148	+	fepD	94.69	77.57	vfdb	NP_752608	(fepD) ferrienterobactin ABC transporter permease [Enterobactin (VF0228)] [Escherichia coli CFT073]
Kluyvera genomosp. 3	missing	ERR3712946	17245	18158	+	fepG	91.74	78.63	vfdb	NP_752607	(fepG) iron-enterobactin ABC transporter permease [Enterobactin (VF0228)] [Escherichia coli CFT073]
Kluyvera genomosp. 3	missing	ERR3712946	23228	24305	-	fes	87.45	71.72	vfdb	NP_752602	(fes) enterobactin/ferric enterobactin esterase [enterobactin (IA019)] [Escherichia coli CFT073]
Kluyvera genomosp. 3	missing	ERR3712946	31734	32242	+	fimA	83.83	70.39	vfdb	NP_757241	(fimA) Type-1 fimbrial protein A chain precursor [Type 1 fimbriae (VF0221)] [Escherichia coli CFT073]
Kluyvera genomosp. 3	missing	ERR3712946	32985	33580	+	fimC	82.09	76.01	vfdb	NP_757243	(fimC) Chaperone protein fimC precursor [Type 1 fimbriae (VF0221)] [Escherichia coli CFT073]
Kluyvera genomosp. 3	missing	ERR3712946	33776	36239	+	fimD	93.25	74.86	vfdb	NP_757244	(fimD) Outer membrane usher protein fimD precursor [Type 1 fimbriae (VF0221)] [Escherichia coli CFT073]
Kluyvera genomosp. 3	missing	ERR3712946	36277	36809	+	fimF	98.5	71.11	vfdb	NP_757245	(fimF) FimF protein precursor [Type 1 fimbriae (VF0221)] [Escherichia coli CFT073]
Kluyvera genomosp. 3	missing	ERR3712946	36887	37325	+	fimG	87.1	71.98	vfdb	NP_757247	(fimG) FimG protein precursor [Type 1 fimbriae (VF0221)] [Escherichia coli CFT073]
Kluyvera genomosp. 3	missing	ERR3712946	37335	38243	+	fimH	99.34	75.8	vfdb	NP_757248	(fimH) FimH protein precursor [Type 1 fimbriae (VF0221)] [Escherichia coli CFT073]
Kluyvera genomosp. 3	missing	ERR3712946	32351	32856	+	fimI	93.52	67.26	vfdb	NP_757242	(fimI) Fimbrin-like protein fimI precursor [Type 1 fimbriae (VF0221)] [Escherichia coli CFT073]
Kluyvera genomosp. 3	missing	ERR3712946	49150	50056	-	gtrB	97.53	70.23	vfdb	NP_706258	(gtrB) bactoprenol glucosyl transferase [LPS (VF0124)] [Shigella flexneri 2a str. 301]
Kluyvera genomosp. 3	missing	ERR3712946	23290	25499	-	iutA	96.8	78.04	vfdb	NP_755498	(iutA) ferric aerobactin receptor precusor IutA [Aerobactin (VF0229)] [Escherichia coli CFT073]
Kluyvera genomosp. 3	missing	ERR3712946	95473	96528	-	ompA	100	84.47	vfdb	AAF37887	(ompA) outer membrane protein A [OmpA (VF0236)] [Escherichia coli O18:K1:H7 str. RS218]
Kluyvera genomosp. 3	YDC799	GCA_002211745.1	4775172	4776486	+	aslA	92.02	80.87	vfdb	AAG10151	(aslA) putative arylsulfatase [AslA (VF0238)] [Escherichia coli O18:K1:H7 str. RS218]
Kluyvera genomosp. 3	YDC799	GCA_002211745.1	1025790	1026702	-	chuS	87.66	66.6	vfdb	NP_756169	(chuS) heme oxygenase ChuS [Chu (VF0227)] [Escherichia coli CFT073]
Kluyvera genomosp. 3	YDC799	GCA_002211745.1	1023986	1024803	-	chuU	81.07	65.95	vfdb	NP_756179	(chuU) heme permease protein ChuU [Chu (VF0227)] [Escherichia coli CFT073]
Kluyvera genomosp. 3	YDC799	GCA_002211745.1	2931345	2932065	-	csgG	85.97	75.07	vfdb	NP_460110	(csgG) curli production assembly/transport protein CsgG [Agf (VF0103)] [Salmonella enterica subsp. enterica serovar Typhimurium str. LT2]
Kluyvera genomosp. 3	YDC799	GCA_002211745.1	3561044	3561767	-	entA	96.79	78.79	vfdb	NP_752614	(entA) 23-dihydro-23-dihydroxybenzoate dehydrogenase [Enterobactin (VF0228)] [Escherichia coli CFT073]
Kluyvera genomosp. 3	YDC799	GCA_002211745.1	3561797	3562650	-	entB	99.42	78.7	vfdb	NP_752613	(entB) isochorismatase [Enterobactin (VF0228)] [Escherichia coli CFT073]
Kluyvera genomosp. 3	YDC799	GCA_002211745.1	3564282	3565467	-	entC	98.15	74.81	vfdb	NP_752611	(entC) isochorismate synthase 1 [Enterobactin (VF0228)] [Escherichia coli CFT073]
Kluyvera genomosp. 3	YDC799	GCA_002211745.1	3562683	3564261	-	entE	97.64	77.69	vfdb	NP_752612	(entE) 23-dihydroxybenzoate-AMP ligase component of enterobactin synthase multienzyme complex [Enterobactin (VF0228)] [Escherichia coli CFT073]
Kluyvera genomosp. 3	YDC799	GCA_002211745.1	3571064	3574870	-	entF	96.81	71.96	vfdb	NP_752604	(entF) enterobactin synthase multienzyme complex component ATP-dependent [Enterobactin (VF0228)] [Escherichia coli CFT073]
Kluyvera genomosp. 3	YDC799	GCA_002211745.1	3566770	3567979	-	entS	96.72	77.71	vfdb	NP_752609	(entS) enterobactin exporter iron-regulated [enterobactin (IA019)] [Escherichia coli CFT073]
Kluyvera genomosp. 3	YDC799	GCA_002211745.1	3576606	3578720	+	fepA	94.15	78.76	vfdb	NP_752600	(fepA) ferrienterobactin outer membrane transporter [Enterobactin (VF0228)] [Escherichia coli CFT073]
Kluyvera genomosp. 3	YDC799	GCA_002211745.1	3565742	3566608	+	fepB	90.49	78.37	vfdb	NP_752610	(fepB) ferrienterobactin ABC transporter periplasmic binding protein [Enterobactin (VF0228)] [Escherichia coli CFT073]
Kluyvera genomosp. 3	YDC799	GCA_002211745.1	3570080	3570864	+	fepC	96.08	77.48	vfdb	NP_752606	(fepC) ferrienterobactin ABC transporter ATPase [Enterobactin (VF0228)] [Escherichia coli CFT073]
Kluyvera genomosp. 3	YDC799	GCA_002211745.1	3568116	3569076	+	fepD	94.49	77.57	vfdb	NP_752608	(fepD) ferrienterobactin ABC transporter permease [Enterobactin (VF0228)] [Escherichia coli CFT073]
Kluyvera genomosp. 3	YDC799	GCA_002211745.1	3569173	3570083	+	fepG	91.44	78.41	vfdb	NP_752607	(fepG) iron-enterobactin ABC transporter permease [Enterobactin (VF0228)] [Escherichia coli CFT073]
Kluyvera genomosp. 3	YDC799	GCA_002211745.1	3575147	3576288	-	fes	92.85	70.85	vfdb	NP_752602	(fes) enterobactin/ferric enterobactin esterase [enterobactin (IA019)] [Escherichia coli CFT073]
Kluyvera genomosp. 3	YDC799	GCA_002211745.1	761195	761702	+	fimA	83.66	70.39	vfdb	NP_757241	(fimA) Type-1 fimbrial protein A chain precursor [Type 1 fimbriae (VF0221)] [Escherichia coli CFT073]
Kluyvera genomosp. 3	YDC799	GCA_002211745.1	762444	763037	+	fimC	81.82	75.5	vfdb	NP_757243	(fimC) Chaperone protein fimC precursor [Type 1 fimbriae (VF0221)] [Escherichia coli CFT073]
Kluyvera genomosp. 3	YDC799	GCA_002211745.1	763233	765685	+	fimD	92.87	74.89	vfdb	NP_757244	(fimD) Outer membrane usher protein fimD precursor [Type 1 fimbriae (VF0221)] [Escherichia coli CFT073]
Kluyvera genomosp. 3	YDC799	GCA_002211745.1	765786	766252	+	fimF	86.33	72.06	vfdb	NP_757245	(fimF) FimF protein precursor [Type 1 fimbriae (VF0221)] [Escherichia coli CFT073]
Kluyvera genomosp. 3	YDC799	GCA_002211745.1	766330	766768	+	fimG	87.1	71.98	vfdb	NP_757247	(fimG) FimG protein precursor [Type 1 fimbriae (VF0221)] [Escherichia coli CFT073]
Kluyvera genomosp. 3	YDC799	GCA_002211745.1	766778	767686	+	fimH	99.34	75.14	vfdb	NP_757248	(fimH) FimH protein precursor [Type 1 fimbriae (VF0221)] [Escherichia coli CFT073]
Kluyvera genomosp. 3	YDC799	GCA_002211745.1	761811	762315	+	fimI	93.33	67.06	vfdb	NP_757242	(fimI) Fimbrin-like protein fimI precursor [Type 1 fimbriae (VF0221)] [Escherichia coli CFT073]
Kluyvera genomosp. 3	YDC799	GCA_002211745.1	3897846	3900051	+	iutA	96.62	77.81	vfdb	NP_755498	(iutA) ferric aerobactin receptor precusor IutA [Aerobactin (VF0229)] [Escherichia coli CFT073]
Kluyvera genomosp. 3	YDC799	GCA_002211745.1	4220282	4221761	+	kpsD	88.13	71.23	vfdb	AAA21682	(kpsD) KpsD [K1 capsule (VF0239)] [Escherichia coli O18:K1:H7 str. RS218]
Kluyvera genomosp. 3	YDC799	GCA_002211745.1	4230419	4231120	-	kpsM	89.32	66.62	vfdb	AAA24046	(kpsM) KpsM [K1 capsule (VF0239)] [Escherichia coli O18:K1:H7 str. RS218]
Kluyvera genomosp. 3	YDC799	GCA_002211745.1	4229772	4230344	-	kpsT	86.21	73.31	vfdb	AAA24047	(kpsT) KpsT [K1 capsule (VF0239)] [Escherichia coli O18:K1:H7 str. RS218]
Kluyvera genomosp. 3	YDC799	GCA_002211745.1	3163825	3164879	+	ompA	99.9	85.32	vfdb	AAF37887	(ompA) outer membrane protein A [OmpA (VF0236)] [Escherichia coli O18:K1:H7 str. RS218]
Kluyvera genomosp. 3	PO2S7	GCA_011765685.1	4842527	4843843	+	aslA	92.16	80.94	vfdb	AAG10151	(aslA) putative arylsulfatase [AslA (VF0238)] [Escherichia coli O18:K1:H7 str. RS218]
Kluyvera genomosp. 3	PO2S7	GCA_011765685.1	1091450	1092363	-	chuS	87.76	66.92	vfdb	NP_756169	(chuS) heme oxygenase ChuS [Chu (VF0227)] [Escherichia coli CFT073]
Kluyvera genomosp. 3	PO2S7	GCA_011765685.1	1089643	1090464	-	chuU	81.47	65.99	vfdb	NP_756179	(chuU) heme permease protein ChuU [Chu (VF0227)] [Escherichia coli CFT073]
Kluyvera genomosp. 3	PO2S7	GCA_011765685.1	3038644	3039396	-	csgG	89.81	74.9	vfdb	NP_460110	(csgG) curli production assembly/transport protein CsgG [Agf (VF0103)] [Salmonella enterica subsp. enterica serovar Typhimurium str. LT2]
Kluyvera genomosp. 3	PO2S7	GCA_011765685.1	3659292	3660016	-	entA	96.92	79.06	vfdb	NP_752614	(entA) 23-dihydro-23-dihydroxybenzoate dehydrogenase [Enterobactin (VF0228)] [Escherichia coli CFT073]
Kluyvera genomosp. 3	PO2S7	GCA_011765685.1	3660046	3660900	-	entB	99.53	78.7	vfdb	NP_752613	(entB) isochorismatase [Enterobactin (VF0228)] [Escherichia coli CFT073]
Kluyvera genomosp. 3	PO2S7	GCA_011765685.1	3662534	3663726	-	entC	98.57	75.02	vfdb	NP_752611	(entC) isochorismate synthase 1 [Enterobactin (VF0228)] [Escherichia coli CFT073]
Kluyvera genomosp. 3	PO2S7	GCA_011765685.1	3660933	3662513	-	entE	97.58	77.48	vfdb	NP_752612	(entE) 23-dihydroxybenzoate-AMP ligase component of enterobactin synthase multienzyme complex [Enterobactin (VF0228)] [Escherichia coli CFT073]
Kluyvera genomosp. 3	PO2S7	GCA_011765685.1	3671658	3675373	-	entF	94.41	72.22	vfdb	NP_752604	(entF) enterobactin synthase multienzyme complex component ATP-dependent [Enterobactin (VF0228)] [Escherichia coli CFT073]
Kluyvera genomosp. 3	PO2S7	GCA_011765685.1	3667294	3668472	-	entS	94.24	77.27	vfdb	NP_752609	(entS) enterobactin exporter iron-regulated [enterobactin (IA019)] [Escherichia coli CFT073]
Kluyvera genomosp. 3	PO2S7	GCA_011765685.1	3677111	3679281	+	fepA	94.78	76.48	vfdb	NP_752600	(fepA) ferrienterobactin outer membrane transporter [Enterobactin (VF0228)] [Escherichia coli CFT073]
Kluyvera genomosp. 3	PO2S7	GCA_011765685.1	3664001	3664868	+	fepB	90.7	78.69	vfdb	NP_752610	(fepB) ferrienterobactin ABC transporter periplasmic binding protein [Enterobactin (VF0228)] [Escherichia coli CFT073]
Kluyvera genomosp. 3	PO2S7	GCA_011765685.1	3670577	3671364	+	fepC	96.45	77.82	vfdb	NP_752606	(fepC) ferrienterobactin ABC transporter ATPase [Enterobactin (VF0228)] [Escherichia coli CFT073]
Kluyvera genomosp. 3	PO2S7	GCA_011765685.1	3668608	3669570	+	fepD	94.69	77.98	vfdb	NP_752608	(fepD) ferrienterobactin ABC transporter permease [Enterobactin (VF0228)] [Escherichia coli CFT073]
Kluyvera genomosp. 3	PO2S7	GCA_011765685.1	3669667	3670580	+	fepG	91.74	78.3	vfdb	NP_752607	(fepG) iron-enterobactin ABC transporter permease [Enterobactin (VF0228)] [Escherichia coli CFT073]
Kluyvera genomosp. 3	PO2S7	GCA_011765685.1	3675650	3676727	-	fes	87.53	71.05	vfdb	NP_752602	(fes) enterobactin/ferric enterobactin esterase [enterobactin (IA019)] [Escherichia coli CFT073]
Kluyvera genomosp. 3	PO2S7	GCA_011765685.1	821434	822029	+	fimC	82.09	76.01	vfdb	NP_757243	(fimC) Chaperone protein fimC precursor [Type 1 fimbriae (VF0221)] [Escherichia coli CFT073]
Kluyvera genomosp. 3	PO2S7	GCA_011765685.1	822225	824688	+	fimD	93.29	74.93	vfdb	NP_757244	(fimD) Outer membrane usher protein fimD precursor [Type 1 fimbriae (VF0221)] [Escherichia coli CFT073]
Kluyvera genomosp. 3	PO2S7	GCA_011765685.1	824726	825258	+	fimF	98.5	71.11	vfdb	NP_757245	(fimF) FimF protein precursor [Type 1 fimbriae (VF0221)] [Escherichia coli CFT073]
Kluyvera genomosp. 3	PO2S7	GCA_011765685.1	825336	825774	+	fimG	87.1	72.67	vfdb	NP_757247	(fimG) FimG protein precursor [Type 1 fimbriae (VF0221)] [Escherichia coli CFT073]
Kluyvera genomosp. 3	PO2S7	GCA_011765685.1	825784	826692	+	fimH	99.34	75.36	vfdb	NP_757248	(fimH) FimH protein precursor [Type 1 fimbriae (VF0221)] [Escherichia coli CFT073]
Kluyvera genomosp. 3	PO2S7	GCA_011765685.1	820800	821305	+	fimI	93.52	67.06	vfdb	NP_757242	(fimI) Fimbrin-like protein fimI precursor [Type 1 fimbriae (VF0221)] [Escherichia coli CFT073]
Kluyvera genomosp. 3	PO2S7	GCA_011765685.1	1628245	1629151	-	gtrB	97.53	70.12	vfdb	NP_706258	(gtrB) bactoprenol glucosyl transferase [LPS (VF0124)] [Shigella flexneri 2a str. 301]
Kluyvera genomosp. 3	PO2S7	GCA_011765685.1	3974106	3976315	+	iutA	96.8	77.99	vfdb	NP_755498	(iutA) ferric aerobactin receptor precusor IutA [Aerobactin (VF0229)] [Escherichia coli CFT073]
Kluyvera genomosp. 3	PO2S7	GCA_011765685.1	4317460	4318984	+	kpsD	90.34	71.99	vfdb	AAA21682	(kpsD) KpsD [K1 capsule (VF0239)] [Escherichia coli O18:K1:H7 str. RS218]
Kluyvera genomosp. 3	PO2S7	GCA_011765685.1	4328856	4329632	-	kpsM	99.23	66.41	vfdb	AAA24046	(kpsM) KpsM [K1 capsule (VF0239)] [Escherichia coli O18:K1:H7 str. RS218]
Kluyvera genomosp. 3	PO2S7	GCA_011765685.1	3287076	3288131	+	ompA	100	85.32	vfdb	AAF37887	(ompA) outer membrane protein A [OmpA (VF0236)] [Escherichia coli O18:K1:H7 str. RS218]
Kluyvera genomosp. 4	D51-sc-1712206	ERR2221162	48281	49709	+	aslA	99.72	81.16	vfdb	AAG10151	(aslA) putative arylsulfatase [AslA (VF0238)] [Escherichia coli O18:K1:H7 str. RS218]
Kluyvera genomosp. 4	D51-sc-1712206	ERR2221162	141755	143665	-	chuA	97.69	77.05	vfdb	NP_756170	(chuA) Outer membrane heme/hemoglobin receptor ChuA [Chu (VF0227)] [Escherichia coli CFT073]
Kluyvera genomosp. 4	D51-sc-1712206	ERR2221162	140721	141706	-	chuS	95.43	75.86	vfdb	NP_756169	(chuS) heme oxygenase ChuS [Chu (VF0227)] [Escherichia coli CFT073]
Kluyvera genomosp. 4	D51-sc-1712206	ERR2221162	13463	14285	-	chuT	82.88	72.09	vfdb	NP_756175	(chuT) periplasmic heme-binding protein ChuT [Chu (VF0227)] [Escherichia coli CFT073]
Kluyvera genomosp. 4	D51-sc-1712206	ERR2221162	9937	10919	-	chuU	98.69	73.22	vfdb	NP_756179	(chuU) heme permease protein ChuU [Chu (VF0227)] [Escherichia coli CFT073]
Kluyvera genomosp. 4	D51-sc-1712206	ERR2221162	9238	9959	-	chuV	90.01	70.26	vfdb	NP_756180	(chuV) ATP-binding hydrophilic protein ChuV [Chu (VF0227)] [Escherichia coli CFT073]
Kluyvera genomosp. 4	D51-sc-1712206	ERR2221162	12102	13421	-	chuW	98.51	76.17	vfdb	NP_756176	(chuW) Putative oxygen independent coproporphyrinogen III oxidase [Chu (VF0227)] [Escherichia coli CFT073]
Kluyvera genomosp. 4	D51-sc-1712206	ERR2221162	11617	12089	-	chuX	95.56	76.96	vfdb	NP_756177	(chuX) putative heme-binding protein ChuX [Chu (VF0227)] [Escherichia coli CFT073]
Kluyvera genomosp. 4	D51-sc-1712206	ERR2221162	4996	5735	+	entA	98.93	78.68	vfdb	NP_752614	(entA) 23-dihydro-23-dihydroxybenzoate dehydrogenase [Enterobactin (VF0228)] [Escherichia coli CFT073]
Kluyvera genomosp. 4	D51-sc-1712206	ERR2221162	4130	4984	+	entB	99.53	80.21	vfdb	NP_752613	(entB) isochorismatase [Enterobactin (VF0228)] [Escherichia coli CFT073]
Kluyvera genomosp. 4	D51-sc-1712206	ERR2221162	1304	2496	+	entC	98.32	72.94	vfdb	NP_752611	(entC) isochorismate synthase 1 [Enterobactin (VF0228)] [Escherichia coli CFT073]
Kluyvera genomosp. 4	D51-sc-1712206	ERR2221162	2517	4098	+	entE	97.95	77.3	vfdb	NP_752612	(entE) 23-dihydroxybenzoate-AMP ligase component of enterobactin synthase multienzyme complex [Enterobactin (VF0228)] [Escherichia coli CFT073]
Kluyvera genomosp. 4	D51-sc-1712206	ERR2221162	52711	56514	+	entF	97.35	72.24	vfdb	NP_752604	(entF) enterobactin synthase multienzyme complex component ATP-dependent [Enterobactin (VF0228)] [Escherichia coli CFT073]
Kluyvera genomosp. 4	D51-sc-1712206	ERR2221162	59823	61033	+	entS	96.8	77.46	vfdb	NP_752609	(entS) enterobactin exporter iron-regulated [enterobactin (IA019)] [Escherichia coli CFT073]
Kluyvera genomosp. 4	D51-sc-1712206	ERR2221162	48788	51061	-	fepA	98.75	75.93	vfdb	NP_752600	(fepA) ferrienterobactin outer membrane transporter [Enterobactin (VF0228)] [Escherichia coli CFT073]
Kluyvera genomosp. 4	D51-sc-1712206	ERR2221162	129	1007	-	fepB	91.85	79.75	vfdb	NP_752610	(fepB) ferrienterobactin ABC transporter periplasmic binding protein [Enterobactin (VF0228)] [Escherichia coli CFT073]
Kluyvera genomosp. 4	D51-sc-1712206	ERR2221162	56933	57720	-	fepC	96.57	77.54	vfdb	NP_752606	(fepC) ferrienterobactin ABC transporter ATPase [Enterobactin (VF0228)] [Escherichia coli CFT073]
Kluyvera genomosp. 4	D51-sc-1712206	ERR2221162	58706	59608	-	fepD	88.2	77.79	vfdb	NP_752608	(fepD) ferrienterobactin ABC transporter permease [Enterobactin (VF0228)] [Escherichia coli CFT073]
Kluyvera genomosp. 4	D51-sc-1712206	ERR2221162	57717	58628	-	fepG	91.54	78.03	vfdb	NP_752607	(fepG) iron-enterobactin ABC transporter permease [Enterobactin (VF0228)] [Escherichia coli CFT073]
Kluyvera genomosp. 4	D51-sc-1712206	ERR2221162	51326	52414	+	fes	88.78	70.23	vfdb	NP_752602	(fes) enterobactin/ferric enterobactin esterase [enterobactin (IA019)] [Escherichia coli CFT073]
Kluyvera genomosp. 4	D51-sc-1712206	ERR2221162	75130	75658	+	fimA	86.63	75.05	vfdb	NP_757241	(fimA) Type-1 fimbrial protein A chain precursor [Type 1 fimbriae (VF0221)] [Escherichia coli CFT073]
Kluyvera genomosp. 4	D51-sc-1712206	ERR2221162	76406	77003	+	fimC	82.37	76.42	vfdb	NP_757243	(fimC) Chaperone protein fimC precursor [Type 1 fimbriae (VF0221)] [Escherichia coli CFT073]
Kluyvera genomosp. 4	D51-sc-1712206	ERR2221162	77233	79737	+	fimD	94.77	74.59	vfdb	NP_757244	(fimD) Outer membrane usher protein fimD precursor [Type 1 fimbriae (VF0221)] [Escherichia coli CFT073]
Kluyvera genomosp. 4	D51-sc-1712206	ERR2221162	79753	80274	+	fimF	97.19	69.33	vfdb	NP_757245	(fimF) FimF protein precursor [Type 1 fimbriae (VF0221)] [Escherichia coli CFT073]
Kluyvera genomosp. 4	D51-sc-1712206	ERR2221162	80327	80790	+	fimG	91.47	75.16	vfdb	NP_757247	(fimG) FimG protein precursor [Type 1 fimbriae (VF0221)] [Escherichia coli CFT073]
Kluyvera genomosp. 4	D51-sc-1712206	ERR2221162	80805	81708	+	fimH	98.68	75.58	vfdb	NP_757248	(fimH) FimH protein precursor [Type 1 fimbriae (VF0221)] [Escherichia coli CFT073]
Kluyvera genomosp. 4	D51-sc-1712206	ERR2221162	75772	76258	+	fimI	89.63	69.59	vfdb	NP_757242	(fimI) Fimbrin-like protein fimI precursor [Type 1 fimbriae (VF0221)] [Escherichia coli CFT073]
Kluyvera genomosp. 4	D51-sc-1712206	ERR2221162	15763	16652	-	gtrB	95.59	76.99	vfdb	NP_706258	(gtrB) bactoprenol glucosyl transferase [LPS (VF0124)] [Shigella flexneri 2a str. 301]
Kluyvera genomosp. 4	D51-sc-1712206	ERR2221162	44879	45768	-	gtrB	95.7	74.16	vfdb	NP_706258	(gtrB) bactoprenol glucosyl transferase [LPS (VF0124)] [Shigella flexneri 2a str. 301]
Kluyvera genomosp. 4	D51-sc-1712206	ERR2221162	298161	299069	+	gtrB	97.31	69.66	vfdb	NP_706258	(gtrB) bactoprenol glucosyl transferase [LPS (VF0124)] [Shigella flexneri 2a str. 301]
Kluyvera genomosp. 4	D51-sc-1712206	ERR2221162	69997	72204	-	iutA	96.84	78.03	vfdb	NP_755498	(iutA) ferric aerobactin receptor precusor IutA [Aerobactin (VF0229)] [Escherichia coli CFT073]
Kluyvera genomosp. 4	D51-sc-1712206	ERR2221162	24114	25169	-	ompA	100	84.94	vfdb	AAF37887	(ompA) outer membrane protein A [OmpA (VF0236)] [Escherichia coli O18:K1:H7 str. RS218]
Kluyvera genomosp. 4	D51-sc-1712206	ERR2221162	10979	11595	-	shuY	97.76	72.6	vfdb	YP_405015	(shuY) shu locus protein ShuY [Shu (VF0256)] [Shigella dysenteriae Sd197]
Kluyvera genomosp. 4	D51-sc-1712206	ERR2221162	83843	85848	+	sinH	91.43	75.29	vfdb	NP_461452	(sinH) intimin-like protein [SinH (VF0400)] [Salmonella enterica subsp. enterica serovar Typhimurium str. LT2]
Kluyvera genomosp. 4	D51-sc-1712206	ERR2221162	28482	29122	+	spaP	92.3	68.55	vfdb	NP_461811	(spaP) type III secretion system minor export apparatus protein SpaP [TTSS(SPI-1 encode) (VF0116)] [Salmonella enterica subsp. enterica serovar Typhimurium str. LT2]
Kluyvera genomosp. 4	D51-sc-1712206	ERR2221162	73733	74397	+	yagV/ecpE	86.64	66.22	vfdb	NP_286006	(yagV/ecpE) E. coli common pilus chaperone EcpE [ECP (VF0404)] [Escherichia coli O157:H7 str. EDL933]
Kluyvera genomosp. 4	D51-sc-1712206	ERR2221162	72232	73809	+	yagW/ecpD	95.92	70.99	vfdb	NP_286007	(yagW/ecpD) polymerized tip adhesin of ECP fibers [ECP (VF0404)] [Escherichia coli O157:H7 str. EDL933]
Kluyvera genomosp. 4	D51-sc-1712206	ERR2221162	69703	72125	+	yagX/ecpC	95.65	73.59	vfdb	NP_286008	(yagX/ecpC) E. coli common pilus usher EcpC [ECP (VF0404)] [Escherichia coli O157:H7 str. EDL933]
Kluyvera genomosp. 4	D51-sc-1712206	ERR2221162	69008	69627	+	yagY/ecpB	92.68	70.81	vfdb	NP_286009	(yagY/ecpB) E. coli common pilus chaperone EcpB [ECP (VF0404)] [Escherichia coli O157:H7 str. EDL933]
Kluyvera genomosp. 4	D51-sc-1712206	ERR2221162	68368	68898	+	yagZ/ecpA	89.97	77.86	vfdb	NP_286010	(yagZ/ecpA) E. coli common pilus structural subunit EcpA [ECP (VF0404)] [Escherichia coli O157:H7 str. EDL933]
Kluyvera genomosp. 4	e02842a0-063f-11e6-bb80-3c4a9275d6c8	ERR2221354	39150	40578	-	aslA	99.72	81.16	vfdb	AAG10151	(aslA) putative arylsulfatase [AslA (VF0238)] [Escherichia coli O18:K1:H7 str. RS218]
Kluyvera genomosp. 4	e02842a0-063f-11e6-bb80-3c4a9275d6c8	ERR2221354	50455	52365	+	chuA	97.69	77.05	vfdb	NP_756170	(chuA) Outer membrane heme/hemoglobin receptor ChuA [Chu (VF0227)] [Escherichia coli CFT073]
Kluyvera genomosp. 4	e02842a0-063f-11e6-bb80-3c4a9275d6c8	ERR2221354	52414	53399	+	chuS	95.43	75.86	vfdb	NP_756169	(chuS) heme oxygenase ChuS [Chu (VF0227)] [Escherichia coli CFT073]
Kluyvera genomosp. 4	e02842a0-063f-11e6-bb80-3c4a9275d6c8	ERR2221354	59326	60148	+	chuT	82.88	72.09	vfdb	NP_756175	(chuT) periplasmic heme-binding protein ChuT [Chu (VF0227)] [Escherichia coli CFT073]
Kluyvera genomosp. 4	e02842a0-063f-11e6-bb80-3c4a9275d6c8	ERR2221354	62692	63674	+	chuU	98.69	73.22	vfdb	NP_756179	(chuU) heme permease protein ChuU [Chu (VF0227)] [Escherichia coli CFT073]
Kluyvera genomosp. 4	e02842a0-063f-11e6-bb80-3c4a9275d6c8	ERR2221354	63652	64373	+	chuV	90.01	70.26	vfdb	NP_756180	(chuV) ATP-binding hydrophilic protein ChuV [Chu (VF0227)] [Escherichia coli CFT073]
Kluyvera genomosp. 4	e02842a0-063f-11e6-bb80-3c4a9275d6c8	ERR2221354	60190	61509	+	chuW	98.51	76.17	vfdb	NP_756176	(chuW) Putative oxygen independent coproporphyrinogen III oxidase [Chu (VF0227)] [Escherichia coli CFT073]
Kluyvera genomosp. 4	e02842a0-063f-11e6-bb80-3c4a9275d6c8	ERR2221354	61522	61994	+	chuX	95.56	76.96	vfdb	NP_756177	(chuX) putative heme-binding protein ChuX [Chu (VF0227)] [Escherichia coli CFT073]
Kluyvera genomosp. 4	e02842a0-063f-11e6-bb80-3c4a9275d6c8	ERR2221354	5008	5747	+	entA	98.93	78.68	vfdb	NP_752614	(entA) 23-dihydro-23-dihydroxybenzoate dehydrogenase [Enterobactin (VF0228)] [Escherichia coli CFT073]
Kluyvera genomosp. 4	e02842a0-063f-11e6-bb80-3c4a9275d6c8	ERR2221354	4142	4996	+	entB	99.53	80.21	vfdb	NP_752613	(entB) isochorismatase [Enterobactin (VF0228)] [Escherichia coli CFT073]
Kluyvera genomosp. 4	e02842a0-063f-11e6-bb80-3c4a9275d6c8	ERR2221354	1316	2508	+	entC	98.32	72.94	vfdb	NP_752611	(entC) isochorismate synthase 1 [Enterobactin (VF0228)] [Escherichia coli CFT073]
Kluyvera genomosp. 4	e02842a0-063f-11e6-bb80-3c4a9275d6c8	ERR2221354	2529	4110	+	entE	97.95	77.3	vfdb	NP_752612	(entE) 23-dihydroxybenzoate-AMP ligase component of enterobactin synthase multienzyme complex [Enterobactin (VF0228)] [Escherichia coli CFT073]
Kluyvera genomosp. 4	e02842a0-063f-11e6-bb80-3c4a9275d6c8	ERR2221354	251794	255597	+	entF	97.35	72.24	vfdb	NP_752604	(entF) enterobactin synthase multienzyme complex component ATP-dependent [Enterobactin (VF0228)] [Escherichia coli CFT073]
Kluyvera genomosp. 4	e02842a0-063f-11e6-bb80-3c4a9275d6c8	ERR2221354	258906	260116	+	entS	96.8	77.46	vfdb	NP_752609	(entS) enterobactin exporter iron-regulated [enterobactin (IA019)] [Escherichia coli CFT073]
Kluyvera genomosp. 4	e02842a0-063f-11e6-bb80-3c4a9275d6c8	ERR2221354	247871	250144	-	fepA	98.75	75.93	vfdb	NP_752600	(fepA) ferrienterobactin outer membrane transporter [Enterobactin (VF0228)] [Escherichia coli CFT073]
Kluyvera genomosp. 4	e02842a0-063f-11e6-bb80-3c4a9275d6c8	ERR2221354	141	1019	-	fepB	91.85	79.75	vfdb	NP_752610	(fepB) ferrienterobactin ABC transporter periplasmic binding protein [Enterobactin (VF0228)] [Escherichia coli CFT073]
Kluyvera genomosp. 4	e02842a0-063f-11e6-bb80-3c4a9275d6c8	ERR2221354	256016	256803	-	fepC	96.57	77.54	vfdb	NP_752606	(fepC) ferrienterobactin ABC transporter ATPase [Enterobactin (VF0228)] [Escherichia coli CFT073]
Kluyvera genomosp. 4	e02842a0-063f-11e6-bb80-3c4a9275d6c8	ERR2221354	257789	258691	-	fepD	88.2	77.79	vfdb	NP_752608	(fepD) ferrienterobactin ABC transporter permease [Enterobactin (VF0228)] [Escherichia coli CFT073]
Kluyvera genomosp. 4	e02842a0-063f-11e6-bb80-3c4a9275d6c8	ERR2221354	256800	257711	-	fepG	91.54	78.03	vfdb	NP_752607	(fepG) iron-enterobactin ABC transporter permease [Enterobactin (VF0228)] [Escherichia coli CFT073]
Kluyvera genomosp. 4	e02842a0-063f-11e6-bb80-3c4a9275d6c8	ERR2221354	250409	251497	+	fes	88.78	70.23	vfdb	NP_752602	(fes) enterobactin/ferric enterobactin esterase [enterobactin (IA019)] [Escherichia coli CFT073]
Kluyvera genomosp. 4	e02842a0-063f-11e6-bb80-3c4a9275d6c8	ERR2221354	68747	69275	-	fimA	86.63	75.05	vfdb	NP_757241	(fimA) Type-1 fimbrial protein A chain precursor [Type 1 fimbriae (VF0221)] [Escherichia coli CFT073]
Kluyvera genomosp. 4	e02842a0-063f-11e6-bb80-3c4a9275d6c8	ERR2221354	67402	67999	-	fimC	82.37	76.42	vfdb	NP_757243	(fimC) Chaperone protein fimC precursor [Type 1 fimbriae (VF0221)] [Escherichia coli CFT073]
Kluyvera genomosp. 4	e02842a0-063f-11e6-bb80-3c4a9275d6c8	ERR2221354	64668	67172	-	fimD	94.77	74.59	vfdb	NP_757244	(fimD) Outer membrane usher protein fimD precursor [Type 1 fimbriae (VF0221)] [Escherichia coli CFT073]
Kluyvera genomosp. 4	e02842a0-063f-11e6-bb80-3c4a9275d6c8	ERR2221354	64131	64652	-	fimF	97.19	69.33	vfdb	NP_757245	(fimF) FimF protein precursor [Type 1 fimbriae (VF0221)] [Escherichia coli CFT073]
Kluyvera genomosp. 4	e02842a0-063f-11e6-bb80-3c4a9275d6c8	ERR2221354	63615	64078	-	fimG	91.47	75.16	vfdb	NP_757247	(fimG) FimG protein precursor [Type 1 fimbriae (VF0221)] [Escherichia coli CFT073]
Kluyvera genomosp. 4	e02842a0-063f-11e6-bb80-3c4a9275d6c8	ERR2221354	62697	63600	-	fimH	98.68	75.58	vfdb	NP_757248	(fimH) FimH protein precursor [Type 1 fimbriae (VF0221)] [Escherichia coli CFT073]
Kluyvera genomosp. 4	e02842a0-063f-11e6-bb80-3c4a9275d6c8	ERR2221354	68147	68633	-	fimI	89.63	69.59	vfdb	NP_757242	(fimI) Fimbrin-like protein fimI precursor [Type 1 fimbriae (VF0221)] [Escherichia coli CFT073]
Kluyvera genomosp. 4	e02842a0-063f-11e6-bb80-3c4a9275d6c8	ERR2221354	214846	215735	-	gtrB	95.59	76.99	vfdb	NP_706258	(gtrB) bactoprenol glucosyl transferase [LPS (VF0124)] [Shigella flexneri 2a str. 301]
Kluyvera genomosp. 4	e02842a0-063f-11e6-bb80-3c4a9275d6c8	ERR2221354	44891	45780	-	gtrB	95.7	74.16	vfdb	NP_706258	(gtrB) bactoprenol glucosyl transferase [LPS (VF0124)] [Shigella flexneri 2a str. 301]
Kluyvera genomosp. 4	e02842a0-063f-11e6-bb80-3c4a9275d6c8	ERR2221354	207335	208243	-	gtrB	97.31	69.66	vfdb	NP_706258	(gtrB) bactoprenol glucosyl transferase [LPS (VF0124)] [Shigella flexneri 2a str. 301]
Kluyvera genomosp. 4	e02842a0-063f-11e6-bb80-3c4a9275d6c8	ERR2221354	70009	72216	-	iutA	96.84	78.03	vfdb	NP_755498	(iutA) ferric aerobactin receptor precusor IutA [Aerobactin (VF0229)] [Escherichia coli CFT073]
Kluyvera genomosp. 4	e02842a0-063f-11e6-bb80-3c4a9275d6c8	ERR2221354	86374	87429	-	ompA	100	84.94	vfdb	AAF37887	(ompA) outer membrane protein A [OmpA (VF0236)] [Escherichia coli O18:K1:H7 str. RS218]
Kluyvera genomosp. 4	e02842a0-063f-11e6-bb80-3c4a9275d6c8	ERR2221354	62016	62632	+	shuY	97.76	72.6	vfdb	YP_405015	(shuY) shu locus protein ShuY [Shu (VF0256)] [Shigella dysenteriae Sd197]
Kluyvera genomosp. 4	e02842a0-063f-11e6-bb80-3c4a9275d6c8	ERR2221354	85024	87029	+	sinH	91.43	75.29	vfdb	NP_461452	(sinH) intimin-like protein [SinH (VF0400)] [Salmonella enterica subsp. enterica serovar Typhimurium str. LT2]
Kluyvera genomosp. 4	e02842a0-063f-11e6-bb80-3c4a9275d6c8	ERR2221354	61521	62161	+	spaP	92.3	68.55	vfdb	NP_461811	(spaP) type III secretion system minor export apparatus protein SpaP [TTSS(SPI-1 encode) (VF0116)] [Salmonella enterica subsp. enterica serovar Typhimurium str. LT2]
Kluyvera genomosp. 4	e02842a0-063f-11e6-bb80-3c4a9275d6c8	ERR2221354	73727	74391	+	yagV/ecpE	86.64	66.22	vfdb	NP_286006	(yagV/ecpE) E. coli common pilus chaperone EcpE [ECP (VF0404)] [Escherichia coli O157:H7 str. EDL933]
Kluyvera genomosp. 4	e02842a0-063f-11e6-bb80-3c4a9275d6c8	ERR2221354	72226	73803	+	yagW/ecpD	95.92	70.99	vfdb	NP_286007	(yagW/ecpD) polymerized tip adhesin of ECP fibers [ECP (VF0404)] [Escherichia coli O157:H7 str. EDL933]
Kluyvera genomosp. 4	e02842a0-063f-11e6-bb80-3c4a9275d6c8	ERR2221354	69697	72119	+	yagX/ecpC	95.65	73.59	vfdb	NP_286008	(yagX/ecpC) E. coli common pilus usher EcpC [ECP (VF0404)] [Escherichia coli O157:H7 str. EDL933]
Kluyvera genomosp. 4	e02842a0-063f-11e6-bb80-3c4a9275d6c8	ERR2221354	69002	69621	+	yagY/ecpB	92.68	70.81	vfdb	NP_286009	(yagY/ecpB) E. coli common pilus chaperone EcpB [ECP (VF0404)] [Escherichia coli O157:H7 str. EDL933]
Kluyvera genomosp. 4	e02842a0-063f-11e6-bb80-3c4a9275d6c8	ERR2221354	68362	68892	+	yagZ/ecpA	89.97	77.86	vfdb	NP_286010	(yagZ/ecpA) E. coli common pilus structural subunit EcpA [ECP (VF0404)] [Escherichia coli O157:H7 str. EDL933]
